# Supplementary material
Source: Royal Society of Chemistry journal article supplement (doi:10.1039/d5ja00508f)
Supplement: d5ja00508f2.xlsx [file d5ja00508f2.xlsx]

## Sheet: Table S1
Table S1. Summary of U-Pb isotopic compositions of reported zircon reference materials.
Ref. material Name	Age (Ma) (2s)	U (μg g-1)	Quantity	Ref.
OG-1	3465.4 ± 0.6	236±184	Small grain available from rock outcrop	1
KV01	3230 ± 26	83±74	Small grain available from rock outcrop	2
QGNG	1851.6±0.6	304±502	Small grain available from rock outcrop	3
FC-1/AS3	1099.0±0.6/1099.1±0.5	428±698	Small grain available from rock outcrop	4
91500	1065.4±0.3	81±9	Megacryst	5
Mud Tank (MT)	732 ± 5	15±11	Megacryst	6
GJ-1	608.5±0.4	287±151	Megacryst	7
LKZ-1	570.0±2.5	490±450	Megacryst	8
SL13	572.1±0.4	~238	Megacryst	9
CAM18	571.1 ± 1.4	673±14	Megacryst	10
Tanz	566.16 ± 0.77	269±103	Megacryst	11
Peixe	564±4	-	Small grain available from rock outcrop	12
CZ3	563.9±1.3	550±10	Megacryst	13
Sri Lanka F (SLF)	563.2 ± 4.8	417±57	Megacryst	14
M257	561.3±0.3	853±24	Megacryst	15
S513	561.18 ± 0.63	924±64.6	Megacryst	16
ZS	560.6 ± 1.3	570±40	Megacryst	17
BB	~560	270±3.5	Megacryst	18
Z6266/BR266	559.0±0.2	909±27	Megacryst	19
SLZA/SLZB/SLZC	556.94 ± 1.29/552.90 ± 1.29/560.83 ± 1.29	839±56/1106±106/551±35	Megacryst	20
GZ8	543.92±0.06	1305±57	Megacryst	21
SA01	535.08±0.32	161±50	Megacryst	22
SA02	533.7±3.7	580±23	Megacryst	23
SZR	532.39 ± 0.66	123±109	Megacryst	24
GZ7	530.26±0.05	680±31	Megacryst	21
M127	524.36±0.16	~923	Megacryst	25
R33	418.9±0.4	175±181	Small grain available from rock outcrop	26
Temora 1 (TEM1)	416.75±0.24	161±152	Small grain available from rock outcrop	27
Temora 2 (TEM2)	416.78±0.33	176±140	Small grain available from rock outcrop	26
Plešovice	337.13±0.37	1485±1460	Small grain available from rock outcrop	28
Qinghu	159.38±0.12	1042±773	Small grain available from rock outcrop	29
Jilin	117.63 ± 0.04	439±26	Small grain available from rock outcrop	30
GHR1	48.106±0.023	837±2998	Small grain available from rock outcrop	31
Aus Z2&Aus Z5	38.8963±0.0044/ 38.9022±0.0035	244±3/ 314±4	Megacryst	32
Fish Canyon Tuff (FCT)	28.478 ± 0.024	498±268	Small grain available from rock outcrop	33
Penglai	4.4 ± 0.1	37±16	Megacryst	34
Reference:
1. R. A. Stern, S. Bodorkos, S. L. Kamo, A. H. Hickman and F. Corfu, Geostand. Geoanal. Res., 2009, 33, 145-168.
2. Q. D. Wei, H. Wang, Y. H. Yang, J. H. Yang, C. Huang, S. T. Wu and L. W. Xie, Sci. China. Earth. Sci., 2020, 63, 1780-1790.
3. L. P. Black, S. L. Kamo, I. S. Williams, R. Mundil, D. W. Davis, R. J. Korsch and C. Foudoulis, Chem. Geol., 2003, 200, 171-188.
4. J. B. Paces and J. D. Miller Jr, J. Geophys. Res. Sol. Ea., 1993, 98, 13997-14013.
5. M. Wiedenbeck, P. AllÉ, F. Corfu, W. L. Griffin, M. Meier, F. Oberli, A. V. Quadt, J. C. Roddick and W. Spiegel, Geostand. Newsl., 1995, 19, 1-23.
6. S. E. Gain, Y. Gréau, H. Henry, E. Belousova, I. Dainis, W. L. Griffin and S. Y. O'reilly, Geostand. Geoanal. Res., 2019, 43, 339-354.
7. S. E. Jackson, N. J. Pearson, W. L. Griffin and E. A. Belousova, Chem. Geol., 2004, 211, 47-69.
8. A. C. s. Cheong, Y. J. Jeong, S. Lee, K. Yi, H. J. Jo, H.-S. Lee, C. Park, N. K. Kim, X. H. Li and S. L. Kamo, Minerals, 2019, 9, 325.
9. J. C. Claoué-Long, W. Compston, J. Roberts and C. M. Fanning, SEPM Special Publication, 1995, 54, 3-21.
10. W. Li, B. Xu, Z. Miao, Z. Zhao and H. Liu, Crystals., 2023, 13, 1364.
11. Z. C. Hu, X. H. Li, T. Luo, W. Zhang, J. Crowley, Q. L. Li, X. X. Ling, C. Yang, Y. Li and L. P. Feng, J. Anal. At. Spectrom., 2021, 36, 2715-2734.
12. W. R. Dickinson and G. E. Gehrels, Sediment. Geol., 2003, 163, 29-66.
13. L. Nasdala, P. W. Reiners, J. I. Garver, A. K. Kennedy, R. A. Stern, E. Balan and R. Wirth, Am. Mineral., 2004, 89, 219-231.
14. G. E. Gehrels, V. A. Valencia and J. Ruiz, Geochem. Geophys. Geosyst., 2008, 9, Q03017, doi:10.1029/2007GC001805.
15. L. Nasdala, W. Hofmeister, N. Norberg, J. M. Martinson, F. Corfu, W. Dörr, S. L. Kamo, A. K. Kennedy, A. Kronz and P. W. Reiners, Geostand. Geoanal. Res., 2008, 32, 247-265.
16. T. Luo, L. Qing, C. Zhang, X. D. Deng, H. Li, Z. F. Zhang, Y. S. Liu and Z. C. Hu, Geostand. Geoanal. Res., 2025, 49, 403-423.
17. X. X. Ling, Q. L. Li, C. Yang, T. Luo, Y. Liu, G. Q. Tang, H. L. Yuan and Z. C. Hu, At. Spectrosc., 2022, 43, 134-144.
18. M. M. Santos, C. Lana, R. Scholz, I. Buick, M. D. Schmitz, S. L. Kamo, A. Gerdes, F. Corfu, S. Tapster, P. Lancaster, C. D. Storey, M. A. S. Basei, E. Tohver, A. Alkmim, H. Nalini, K. Krambrock, C. Fantini and M. Wiedenbeck, Geostand. Geoanal. Res., 2017, 41, 335-358.
19. R. A. Stern, Geol. Surv. Can., Curr. Res., 2001, F1, 1-11.
20. P. Hu, T. Luo, J. Crowley, Y. Wu, C. Zhang, X. Xia, T. Long, S. Zhang, Z. Bao and L. Xu, Geostand. Geoanal. Res., 2023, 47, 509-533.
21. L. Nasdala, F. Corfu, B. Schoene, S. R. Tapster, C. J. Wall, M. D. Schmitz, M. Ovtcharova, U. Schaltegger, A. K. Kennedy and A. Kronz, Geostand. Geoanal. Res., 2018, 42, 431-457.research, 2018, 42, 431-457.
22. C. Huang, H. Wang, J. H. Yang, J. Ramezani, C. Yang, S. B. Zhang, Y. H. Yang, X. P. Xia, L. J. Feng and J. Lin, Geostand. Geoanal. Res., 2020, 44, 103-123.
23. C. Huang, H. Wang, J. Yang, C. Yang, Z. Li, Y. Yang, L. Feng, L. Xie and S. Wu, J. Anal. At. Spectrom., 2021, 36, 368-374.
24. D. Gallhofer, E. Skrzypek, C. Hauzenberger, Q. L. Li and S. W. H. Chan, Geostand. Geoanal. Res., 2023, 47, 749-771.
25. L. Nasdala, F. Corfu, J. W. Valley, M. J. Spicuzza, F. Y. Wu, Q. L. Li, Y. H. Yang, C. Fisher, C. Münker and A. K. Kennedy, Geostand. Geoanal. Res., 2016, 40, 457-475.
26. L. P. Black, S. L. Kamo, C. M. Allen, D. W. Davis, J. N. Aleinikoff, J. W. Valley, R. Mundil, I. H. Campbell, R. J. Korsch, I. S. Williams and C. Foudoulis, Chem. Geol., 2004, 205, 115-140.
27. L. P. Black, S. L. Kamo, C. M. Allen, J. N. Aleinikoff, D. W. Davis, R. J. Korsch and C. Foudoulis, Chem. Geol., 2003, 200, 155-170.
28. J. Sláma, J. Košler, D. J. Condon, J. L. Crowley, A. Gerdes, J. M. Hanchar, M. S. Horstwood, G. A. Morris, L. Nasdala and N. Norberg, Chem. Geol., 2008, 249, 1-35.
29. X. H. Li, G. Q. Tang, B. Gong, Y. H. Yang, K. J. Hou, Z. C. Hu, Q. L. Li, Y. Liu and W. X. Li, Chin. Sci. Bull., 2013, 58, 4647-4654.
30. T. Luo, Q. L. Li, X. X. Ling, C. Yang, Y. H. Yang, X. P. Xia, H. L. Yuan and Z. C. Hu, J. Anal. At. Spectrom., 2021, 36, 2216-2226.
31. M. P. Eddy, M. Ibañez-Mejia, S. D. Burgess, M. A. Coble, U. G. Cordani, J. DesOrmeau, G. E. Gehrels, X. H. Li, S. MacLennan and M. Pecha, Geostand. Geoanal. Res., 2019, 43, 113-132.
32. A. K. Kennedy, J. F. Wotzlaw, U. Schaltegger, J. L. Crowley and M. Schmitz, The Can. Mineral., 2014, 52, 409-421.
33. M. D. Schmitz and S. A. Bowring, Geochim. Cosmochim. Acta., 2001, 65, 2571-2587.
34. X. H. Li, W. G. Long, Q. L. Li, Y. Liu, Y. F. Zheng, Y. H. Yang, K. R. Chamberlain, D. F. Wan, C. H. Guo, X. C. Wang and H. Tao, Geostand. Geoanal. Res., 2010, 34, 117-134.

## Sheet: Table S2
Table S2. Major element compositions of TGZ zircon megacrysts determined by EPMA.
Oxide	Na2O	MgO	Al2O3	SiO2	P2O5	CaO	TiO2	Y2O3	La2O3	Ce2O3	ZrO2	HfO2	Yb2O3	ThO2	UO2	Total
Analyses	Mass fraction (% m/m)	Mass fraction (% m/m)	Mass fraction (% m/m)	Mass fraction (% m/m)	Mass fraction (% m/m)	Mass fraction (% m/m)	Mass fraction (% m/m)	Mass fraction (% m/m)	Mass fraction (% m/m)	Mass fraction (% m/m)	Mass fraction (% m/m)	Mass fraction (% m/m)	Mass fraction (% m/m)	Mass fraction (% m/m)	Mass fraction (% m/m)	Mass fraction (% m/m)
TTZ_01	0.035	0.027	-	32.41	0.122	0.036	0.04	-	-	-	65.879	1.751	0.031	0.064	0.199	100.594
TTZ_02	0.054	-	0.036	32.457	0.127	-	-	0.011	-	0.071	65.115	1.626	-	-	0.062	99.559
TTZ_03	0.045	0.007	0.017	32.082	0.14	0.003	-	-	-	-	66.906	1.584	0.106	-	0.003	100.893
TTZ_04	0.017	0.023	-	32.276	0.053	-	0.019	-	0.144	-	65.472	1.37	-	0.038	-	99.412
TTZ_05	-	0.013	-	32.684	0.131	0.002	0.032	-	0.001	0.012	65.288	1.349	-	-	-	99.512
average	0.03775	0.0175	0.0265	32.3818	0.1146	0.0136667	0.0303333	0.011	0.0725	0.0415	65.732	1.536	0.0685	0.051	0.088	99.994
2SD	0.0274727	0.015843	0.019	0.398847	0.0627197	0.0315947	0.0173077	0	0.143	0.059	1.27916	0.308745	0.075	0.026	0.164203	1.24209
"-". The value was below 0.0005% m/m.

## Sheet: Table S3
Table S3. Trace element compositions of TGZ zircon obtained by LA-ICP-MS analysis.
	Ti	Y	Nb	La	Ce	Pr	Nd	Sm	Eu	Gd	Tb	Dy	Ho	Er	Tm	Yb	Lu	Hf	Ta	Pb	Th	U	Th/U
	μg g-1	μg g-1	μg g-1	μg g-1	μg g-1	μg g-1	μg g-1	μg g-1	μg g-1	μg g-1	μg g-1	μg g-1	μg g-1	μg g-1	μg g-1	μg g-1	μg g-1	μg g-1	μg g-1	μg g-1	μg g-1	μg g-1
CUG
TGZ_01	11.4575	118.811	1.53823	-	5.43758	0.04159	0.715668	1.57878	0.984133	6.52428	1.62138	14.5879	3.94198	14.7345	2.57501	21.4926	3.94875	14177	1.03823	34.8117	24.02	96.1702	0.249766
TGZ_02	11.6338	119.919	1.57855	-	5.56751	0.0378131	0.738615	1.63104	0.950006	6.54949	1.66771	14.8943	3.98579	14.9736	2.66543	21.6645	4.02473	14273.6	1.04727	35.5714	24.3471	97.3432	0.250116
TGZ_03	10.071	118.173	1.55114	-	5.49489	0.0407958	0.723528	1.67329	0.954514	6.51598	1.65099	14.7623	3.94906	14.7755	2.59016	21.5127	3.93826	14309.4	1.07337	35.0825	24.1729	96.8062	0.249704
TGZ_04	10.8055	114.155	1.49108	-	5.32478	0.030408	0.65465	1.5214	0.90626	6.28787	1.57328	14.2252	3.83813	14.3601	2.53721	20.7287	3.88141	14212	0.971577	34.1423	23.4304	94.4324	0.248118
TGZ_05	10.0311	114.959	1.52201	-	5.38598	0.0333044	0.702259	1.56394	0.96844	6.40558	1.61671	14.3286	3.90712	14.6226	2.51205	20.9052	3.87628	14347.8	0.988405	34.2408	23.4791	94.6218	0.248136
TGZ_06	11.5709	124.648	1.61011	-	5.70161	0.0391673	0.742637	1.70387	0.992859	6.67901	1.73558	15.4207	4.14445	15.3573	2.66912	22.1674	4.16923	14746.3	1.07639	35.1895	24.5064	98.1078	0.249791
TGZ_07	12.0776	125.331	1.66388	-	5.7151	0.0394402	0.741753	1.77847	1.00233	6.95062	1.73494	15.4792	4.16062	15.552	2.67087	21.9637	4.09643	14598.7	1.07463	35.9046	24.6619	98.8777	0.249418
TGZ_08	10.9112	115.266	1.48856	-	5.36082	0.0317907	0.694999	1.61172	0.930101	6.24123	1.57054	14.2749	3.78781	13.9869	2.45723	20.2843	3.74046	14182	0.95746	33.8684	22.6753	92.6751	0.244675
TGZ_09	10.6054	115.432	1.52089	-	5.22784	0.0306964	0.692087	1.59538	0.906714	6.24404	1.58374	14.166	3.77757	14.2819	2.42651	20.3377	3.78014	14310.9	0.951379	33.4259	22.9817	92.8433	0.247532
TGZ_10	12.2005	119.971	1.58439	-	5.47657	0.0339107	0.706953	1.62934	0.934642	6.57801	1.64097	14.8023	3.94442	14.9293	2.53365	21.3627	4.02872	14632.4	0.988851	34.4268	24.0425	96.7607	0.248474
TGZ_11	10.761	119.046	1.5463	-	5.61549	0.0382771	0.770406	1.64001	0.953473	6.48288	1.68649	14.7347	3.95422	15.0626	2.63468	21.2161	4.06346	15173.2	0.991212	36.1346	24.3719	99.0359	0.246091
TGZ_12	11.8878	129.961	1.67753	-	6.08494	0.0465387	0.822368	1.90527	1.06043	7.2017	1.84347	16.6352	4.53121	16.8179	2.99465	24.298	4.57984	16223.4	1.17892	38.6337	27.6419	110.65	0.249813
TGZ_13	9.88227	126.926	1.62855	-	5.95305	0.0385372	0.738641	1.8012	1.0257	7.31961	1.84599	16.3466	4.37566	16.8627	2.9539	23.8928	4.58482	16325.1	1.12589	38.505	27.6366	110.108	0.250994
TGZ_14	10.3083	128.492	1.64157	-	6.22858	0.0442225	0.764133	1.82012	1.06404	7.31347	1.87235	17.1037	4.6105	17.6553	3.06343	25.2543	4.66582	17131.4	1.23954	40.3755	29.0882	116.838	0.248961
TGZ_15	10.1615	130.468	1.67282	-	6.36701	0.0517663	0.84465	1.88136	1.17204	7.70031	2.00314	17.8833	4.80415	18.0297	3.25793	26.0794	4.9029	17687.9	1.27415	41.8764	30.2895	122.452	0.247358
TGZ_16	11.912	123.355	1.55199	-	5.66221	0.0360175	0.715855	1.5971	0.945937	6.61897	1.66739	14.8856	4.0663	15.0581	2.63861	21.8793	4.01175	15104	1.02096	35.3924	24.5029	98.0018	0.250025
TGZ_17	10.772	125.323	1.59945	-	5.76412	0.0344471	0.727623	1.69983	0.965964	6.77797	1.73186	15.2219	4.17304	15.4502	2.77361	22.3619	4.19276	14892.5	1.07118	36.044	24.9822	100.091	0.249596
TGZ_18	8.83823	115.678	1.52542	-	5.44911	0.0381678	0.680227	1.50753	0.972593	6.351	1.57745	14.2812	3.82645	14.0859	2.52161	20.7918	3.83285	14555.8	0.987441	34.394	23.2335	95.6379	0.242932
TGZ_19	9.20603	97.1753	1.28989	-	5.07594	0.0225112	0.543655	1.11487	0.735278	5.22892	1.33083	11.8301	3.22282	11.9959	2.13731	17.7091	3.26969	15236.6	0.872865	34.4256	22.8879	95.5974	0.23942
TGZ_20	7.39886	83.0997	1.09223	-	4.87095	0.0178189	0.422992	1.01116	0.611828	4.2458	1.0945	10.1539	2.70822	10.3732	1.87689	15.1412	2.81872	14894	0.871622	38.6496	24.4975	106.659	0.22968
TGZ_21	12.8881	182.603	1.69739	-	6.14836	0.066984	1.10649	2.75172	1.48586	9.85541	2.60049	22.8723	6.09682	22.3356	3.92984	31.8687	6.00271	14267.5	1.06759	40.2436	28.3272	111.645	0.253724
TGZ_22	13.6521	185.091	1.76306	-	6.17808	0.0560973	1.15856	2.71164	1.53804	10.4576	2.60606	22.9618	6.12277	22.8731	3.98295	31.8384	6.00524	14045.6	1.08933	41.4996	28.5207	113.519	0.251242
TGZ_23	13.8001	195.15	1.78326	-	6.34763	0.0575717	1.2567	2.81775	1.60915	11.1009	2.80718	24.7883	6.57559	24.0583	4.14858	33.9428	6.35123	14022.6	1.14181	43.6961	30.2908	118.813	0.254944
TGZ_24	13.8427	201.269	1.83961	-	6.56314	0.0746578	1.26678	2.7923	1.6952	11.5006	2.89021	25.5829	6.83383	24.9908	4.32854	34.7723	6.63294	13955.2	1.13404	45.1996	31.5123	122.459	0.257329
TGZ_25	13.8402	189.07	1.84771	-	6.31356	0.0616874	1.20862	2.67681	1.59839	10.6761	2.70566	23.8675	6.41561	23.2851	4.06033	33.3949	6.18819	13918.1	1.13408	42.064	29.4378	116.388	0.252928
TGZ_26	13.7418	181.166	1.71651	-	6.14604	0.0620176	1.13085	2.48177	1.49752	10.3651	2.58613	22.6249	6.16935	22.1481	3.87044	32.084	5.89626	13994.8	1.0718	40.8592	28.6407	112.141	0.255399
TGZ_27	12.7613	181.729	1.70569	-	6.12807	0.0538833	1.10809	2.64874	1.53691	10.3507	2.56808	22.8442	6.12279	22.0631	3.92323	31.392	5.86618	13918.3	1.07084	40.8734	28.0818	111.747	0.251299
TGZ_28	14.182	200.527	1.8826	-	6.62882	0.0743985	1.30311	2.99793	1.68773	11.5577	2.86457	25.3862	6.71675	24.5128	4.22019	34.5301	6.43972	13817	1.1348	44.6819	31.1022	122.541	0.25381
TGZ_29	11.6851	164.634	1.55736	-	5.77647	0.0512857	0.989893	2.39962	1.38333	9.48784	2.32005	20.5714	5.49971	19.9553	3.55197	28.4439	5.34714	14103.7	0.938252	37.4539	25.5545	102.575	0.249131
TGZ_30	12.166	159.864	1.51985	-	5.66071	0.0575771	0.863384	2.22606	1.29753	8.87399	2.22844	19.6044	5.32249	19.6273	3.49642	27.6097	5.19691	14207.3	0.892341	36.1867	24.9941	99.1899	0.251983
TGZ_31	12.8081	178.714	1.66305	-	6.04159	0.0652013	1.15445	2.63922	1.48594	10.2203	2.54844	22.2179	6.01413	21.7255	3.81438	31.14	5.73084	14039.3	1.02218	40.3621	27.5536	110.609	0.249108
TGZ_32	12.0876	169.262	1.6452	-	5.88708	0.0606338	0.991667	2.37879	1.4203	9.61647	2.41117	21.1684	5.67886	20.5519	3.63155	29.2325	5.52618	14025.4	0.967469	38.3074	26.2103	104.613	0.250546
TGZ_33	11.9721	157.819	1.5756	-	5.60813	0.0575128	1.01467	2.34442	1.29348	8.92882	2.19536	19.9072	5.28723	19.4101	3.40686	28.0588	5.23181	14121.3	0.896376	35.8533	24.9092	98.2452	0.253541
TGZ_34	12.167	167.48	1.60081	-	5.78433	0.0523278	1.00852	2.33927	1.37411	9.33928	2.34635	20.9148	5.55296	20.1825	3.6375	29.207	5.45293	14156.3	0.959592	37.5922	26.0756	103.327	0.25236
TGZ_35	14.1754	195.189	1.85497	-	6.52664	0.067673	1.30082	2.86828	1.63286	11.3297	2.82529	24.6214	6.65203	24.1867	4.19078	33.8628	6.37934	14108.9	1.14475	44.0824	30.9566	120.827	0.256205
TGZ_36	12.7012	172.692	1.65491	-	5.97617	0.0517079	1.09389	2.44772	1.42996	9.72325	2.47723	21.712	5.78465	21.1529	3.72341	30.5969	5.61925	14390.1	0.989458	39.0657	26.8124	107.068	0.250424
TGZ_37	12.2407	160.216	1.518	-	5.73292	0.0496671	0.823866	2.18936	1.33335	8.91571	2.28087	20.0393	5.407	19.9728	3.44693	28.383	5.16869	14290.3	0.894241	36.4989	25.141	99.1169	0.25365
TGZ_38	13.4775	169.612	1.59826	-	5.81876	0.059096	1.02251	2.3861	1.41615	9.44315	2.40627	21.2598	5.67325	20.9687	3.68361	29.8026	5.51979	14359.2	1.00244	38.2251	26.687	104.485	0.255414
TGZ_39	13.3883	163.144	1.57274	-	5.76175	0.0527062	0.961875	2.20687	1.38146	9.07514	2.3302	20.4833	5.48777	20.0537	3.52998	28.5408	5.35952	14598.5	0.926819	36.6411	25.4105	99.6382	0.255027
TGZ_40	12.8013	174.936	1.63552	-	5.89503	0.0526585	1.11769	2.44139	1.53826	9.90741	2.48855	22.0466	5.87571	21.5038	3.77924	30.6419	5.75064	14362.6	0.997336	39.6533	27.4364	108.832	0.252098
TGZ_41	13.4773	182.705	1.68524	-	6.21451	0.0620308	1.06915	2.68347	1.52835	10.5225	2.63072	22.8556	6.07705	22.466	3.9533	31.9223	5.84933	14504.4	1.04294	41.4788	28.5495	113.419	0.251717
TGZ_42	12.9871	170.278	1.63206	-	5.95591	0.0512938	1.00768	2.38289	1.391	9.66001	2.41401	21.2883	5.7471	20.8098	3.66089	29.9634	5.54275	14454.9	0.992378	38.3721	26.517	105.486	0.25138
TGZ_43	13.4485	169.375	1.60617	-	5.89827	0.0647154	1.03083	2.3555	1.36841	9.47964	2.40877	20.9389	5.72165	20.971	3.71725	30.4171	5.5536	14518.2	0.949538	37.9867	26.3348	105.625	0.249325
TGZ_44	13.9115	186.097	1.76855	-	6.33029	0.0687212	1.15921	2.79822	1.58883	10.7555	2.7086	23.7072	6.36954	22.8123	4.07041	33.0988	6.11654	14348	1.05482	41.7618	29.3301	116.697	0.251336
TGZ_45	14.5868	183.859	1.73291	0.00550611	6.2271	0.0623597	1.13952	2.57342	1.62423	10.4587	2.60302	23.1957	6.21179	22.7057	3.98595	32.9651	5.99303	14285.8	1.02462	41.947	28.6476	115.521	0.247987
TGZ_46	13.3354	181.234	1.68712	-	6.05542	0.0650926	1.11655	2.52601	1.48798	10.3495	2.57418	22.5308	6.01702	22.2231	3.91237	31.7359	5.88187	14558.8	1.05543	40.3176	28.1169	109.865	0.255922
TGZ_47	14.4386	183.608	1.73624	-	6.17766	0.0601678	1.14797	2.66081	1.60203	10.4143	2.60767	23.0373	6.17225	22.4149	3.95252	32.4207	6.0036	14061.6	1.0407	41.7273	28.6059	113.811	0.251345
TGZ_48	12.9358	181.175	1.72246	-	6.16432	0.0654043	1.166	2.59694	1.54079	10.1509	2.58885	22.6777	6.0743	22.2738	3.94672	32.4312	5.9343	14095.9	1.04189	41.3032	28.3647	112.262	0.252665
TGZ_49	12.386	164.409	1.55357	-	5.76239	0.0483871	0.919841	2.30138	1.33217	9.14038	2.33233	20.4127	5.52919	20.5126	3.57638	28.8949	5.38193	14179.5	0.951892	37.4391	25.7042	101.84	0.252397
TGZ_50	14.1137	170.675	1.58897	-	5.82031	0.0535093	1.02822	2.30119	1.38661	9.74208	2.4673	21.2752	5.70422	21.026	3.70429	29.8057	5.58808	14271.3	0.995715	38.5699	26.4354	105.159	0.251385
TGZ_51	14.1652	183.965	1.68807	0.00605796	6.14928	0.0593844	1.23367	2.66226	1.55676	10.5495	2.69117	23.044	6.07743	22.8699	3.97293	32.0878	5.98179	14217.5	1.02823	41.4386	28.4656	112.485	0.253061
TGZ_52	12.822	167.008	1.56361	-	5.71814	0.0489923	1.00613	2.29968	1.38386	9.18106	2.38193	20.5048	5.59791	20.4005	3.57192	29.309	5.4331	14327.1	0.948779	37.6233	26.0412	102.365	0.254395
TGZ_53	13.6083	187.472	1.77544	-	6.27097	0.0599989	1.18529	2.63276	1.53437	10.3412	2.65261	23.2923	6.24518	22.8437	4.02163	33.0075	6.10216	14058.7	1.10769	42.3263	29.3699	114.545	0.256406
TGZ_54	13.7034	178.393	1.68364	-	5.95969	0.0648847	1.17273	2.53955	1.51138	10.0297	2.51433	22.1803	5.89889	21.691	3.8685	31.0481	5.81307	14096.3	1.012	40.0436	27.6251	109.624	0.251998
TGZ_55	13.7488	172.461	1.59151	-	5.88104	0.0598465	1.0524	2.5474	1.45222	9.76171	2.46329	21.6217	5.79515	20.9558	3.71341	29.9692	5.62424	13845	0.958488	39.4298	26.9514	107.05	0.251765
TGZ_56	9.46738	147.239	1.3101	-	6.22451	0.0305124	0.660356	1.61834	1.01791	7.24079	1.89349	17.361	4.9293	18.4435	3.22862	26.1217	4.88201	14474	1.45653	61.1299	39.8453	165.805	0.240315
TGZ_57	9.82634	128.917	1.20544	-	5.55963	0.036319	0.612686	1.43881	0.907432	6.45189	1.67124	15.2327	4.28456	16.3447	2.85791	23.0377	4.34276	14377.1	1.25511	50.8255	33.061	138.167	0.239283
TGZ_58	10.0507	167.066	1.49374	-	6.76266	0.041921	0.724766	1.8517	1.11832	7.7696	2.0654	19.3882	5.46713	20.9319	3.73629	29.884	5.54797	14773	1.63733	69.9992	45.7672	190.599	0.240123
TGZ_59	10.0289	143.008	1.27319	-	5.88741	0.0325706	0.66188	1.76031	0.989463	6.96279	1.82225	16.8636	4.73522	17.967	3.25741	26.462	5.02509	14438.1	1.17209	52.7357	34.5704	144.376	0.239447
TGZ_60	9.99201	138.704	1.23579	-	5.45198	0.0353264	0.599861	1.58178	0.969366	7.04278	1.73886	16.2821	4.56129	17.909	3.17471	26.6747	5.21304	14224.8	1.10678	49.2581	31.439	134.257	0.23417
WHCGS
TGZ_01	10.0176	81.9547	1.05143	-	4.06984	0.0176706	0.711319	1.1278	0.696303	4.60742	1.20316	10.5209	2.78951	10.0496	1.79761	15.3806	2.50477	11802.4	0.568662	25.8589	17.8756	71.5706	0.249761
TGZ_02	5.16362	85.0543	1.03541	-	4.07388	0.0299966	0.555042	0.966713	0.733781	3.99312	1.32931	10.9235	3.10325	10.442	1.79942	15.4018	2.8507	11595.3	0.571623	26.0302	18.2393	70.9074	0.257228
TGZ_03	5.4736	95.9618	0.99971	0.0108911	4.15324	0.0449083	0.532749	1.53925	0.747067	5.7532	1.46213	12.7506	3.30052	11.4462	1.98144	17.901	2.9543	11471.7	0.65383	28.8799	19.3151	78.0934	0.247333
TGZ_04	5.51992	90.5856	1.06365	0.00722197	4.03874	0.0322662	0.530079	1.27417	0.754246	5.3461	1.33335	11.9463	3.04592	11.1743	1.92561	16.7497	2.8922	11300.2	0.714838	27.2001	18.2863	75.405	0.242508
TGZ_05	7.10596	85.1866	0.9414	-	3.91891	0.0150968	0.644939	1.10709	0.609606	4.88141	1.23106	11.2214	2.76177	9.75744	1.71181	15.2153	2.63483	11699.9	0.628644	25.8104	17.8968	71.5242	0.25022
TGZ_06	5.06659	58.1325	1.01516	-	3.48052	0.00501323	0.27846	0.8522	0.478896	3.10311	0.788877	7.54604	2.06519	7.08384	1.20414	10.545	1.8424	11805.3	0.72152	23.0085	14.2544	62.9273	0.226522
TGZ_07	7.77582	62.5316	1.01594	-	3.89649	0.0220574	0.256943	0.849521	0.569574	3.84203	0.913166	8.71941	2.10005	7.49978	1.26859	10.6262	1.85571	11335.8	0.809916	24.915	15.8581	69.056	0.229642
TGZ_08	5.94606	61.6507	1.00429	-	3.77944	0.0225751	0.428828	0.802532	0.464347	3.34485	0.939129	8.37792	2.14642	7.51035	1.24558	10.9982	1.98614	11740.1	0.768163	25.4477	16.1493	69.3676	0.232808
TGZ_09	7.88525	86.2358	0.956068	0.00715213	4.08364	0.0246032	0.694131	1.0987	0.823657	5.41016	1.31944	11.2259	2.92632	10.0194	1.88232	15.2322	2.64758	11478.8	0.705921	25.7043	18.0081	71.651	0.251331
TGZ_10	9.01838	93.4674	0.987508	-	4.47322	0.041426	0.604263	1.68907	0.806141	5.55785	1.32887	11.801	3.27583	11.0461	1.93118	16.5097	3.07119	11248.5	0.619273	27.6252	18.3239	75.8877	0.241461
TGZ_11	8.24539	86.5971	1.06177	-	4.01226	0.0275199	0.556461	1.26702	0.753604	5.20312	1.15838	11.2369	3.13124	9.75421	1.88486	14.8127	2.63127	11655	0.660747	26.4135	17.8725	71.4972	0.249974
TGZ_12	5.4356	87.6322	0.943882	-	4.1196	0.0294843	0.405035	1.03144	0.769092	4.92756	1.3043	11.3129	2.93551	10.0795	1.82568	14.826	2.63458	11338.3	0.648737	26.6454	17.901	76.5376	0.233885
TGZ_13	7.83198	60.4332	1.10533	-	3.68324	0.014874	0.593988	0.974531	0.444078	3.77522	0.854124	8.11824	1.97012	7.72743	1.38764	10.9255	1.94646	11787.3	0.734714	24.5607	15.1555	67.0614	0.225994
TGZ_14	7.45749	62.399	1.08725	0.00711593	3.64526	0.0202624	0.314676	0.816535	0.522364	3.56357	0.866675	7.59001	2.35792	7.85087	1.386	11.0688	1.89725	11484.3	0.778438	25.9546	16.223	69.6847	0.232806
TGZ_15	7.8252	88.6619	1.03539	-	4.07753	0.0320538	0.738725	1.23202	0.79592	5.51084	1.32224	11.4418	2.92541	10.3342	1.79962	15.1991	2.9628	11527.6	0.639048	27.4389	18.2889	74.4209	0.24575
TGZ_16	8.18279	85.7544	0.895213	-	3.7852	0.0171491	0.713133	1.04888	0.805237	5.17168	1.30047	11.4096	2.91453	10.4393	1.74245	15.1103	2.64245	11444.7	0.621169	26.0302	17.7832	71.8887	0.247371
TGZ_17	8.9851	99.599	1.08203	-	4.38652	0.0465741	0.587714	1.44132	0.974498	5.14403	1.54565	12.684	3.59317	12.0047	2.23289	18.6596	3.21501	11365.8	0.730199	30.1267	20.0686	81.5323	0.246142
TGZ_18	5.26265	99.8807	0.971823	0.00724243	3.97504	0.0374484	0.513145	1.48007	0.900404	5.3356	1.53295	12.6411	3.3256	12.2373	2.281	18.2256	3.09923	11319.4	0.660354	29.5545	20.0472	81.229	0.246798
TGZ_19	4.62738	60.2129	0.947193	-	3.58542	0.0195826	0.377407	0.819568	0.510586	3.36926	0.834509	7.88459	2.04679	6.73088	1.23531	11.1625	1.88637	11589.6	2.78712	24.1195	15.2219	66.3425	0.229444
TGZ_20	7.9109	60.2059	0.928552	-	3.57583	0.0247521	0.593738	0.939693	0.530876	3.27038	0.897555	7.76916	1.97167	7.11652	1.32102	10.4099	1.77757	11662.9	0.750421	24.9452	15.5306	68.0423	0.228249
TGZ_21	8.78068	104.238	1.15088	-	4.20958	0.00562991	0.80922	1.35615	0.889216	6.02751	1.46216	13.4292	3.49864	12.6248	2.24886	19.2623	3.52518	11366.5	0.829877	30.3952	19.5691	83.9682	0.233053
TGZ_22	4.85547	114.474	1.0691	-	4.58631	0.0397655	0.61805	1.27859	0.92394	5.46902	1.7058	13.787	3.96774	13.6368	2.44934	20.8015	3.74057	11292.9	0.846211	33.3129	21.5561	91.1753	0.236424
TGZ_23	9.20199	123.081	1.34295	0.0325788	4.93582	0.0574987	0.964831	1.73099	0.907344	7.34411	1.80624	15.0515	4.07899	14.5758	2.60452	22.4963	3.95051	11249.8	1.11152	36.2393	23.9335	100.518	0.238103
TGZ_24	8.79355	115.229	1.3147	-	4.84635	0.0442411	0.638109	1.61992	1.05378	6.46287	1.69579	14.4119	4.06162	13.6797	2.52138	20.7565	3.82341	11205.3	0.864159	33.6292	22.4264	92.4342	0.24262
TGZ_25	8.73765	112.653	1.26669	-	4.56774	0.0273837	0.576645	1.27605	0.902107	6.272	1.63428	14.453	4.00374	13.3906	2.51197	20.5853	3.70458	11486.3	0.883576	32.6563	21.7173	90.6641	0.239536
TGZ_26	11.0255	111.787	1.08315	-	4.65327	0.022158	0.802763	1.5897	1.04091	6.62122	1.57397	13.9945	3.78721	13.8598	2.45486	20.2557	3.62354	11280.3	0.832745	32.9362	21.4772	90.5013	0.237313
TGZ_27	10.3054	122.735	1.35968	0.0286449	4.85707	0.0526291	0.722088	1.84491	1.15814	7.14319	1.73426	15.2285	4.16057	14.6008	2.70529	22.3087	4.04806	11221.3	0.946246	36.5557	24.0006	99.8583	0.240347
TGZ_28	10.3915	92.0659	1.17699	-	3.81955	0.0273492	0.469495	1.22459	0.777283	4.85076	1.34217	12.3847	3.24248	11.0076	2.10484	17.2	3.05436	11594.6	0.747184	27.2722	17.8345	74.8396	0.238303
TGZ_29	8.76059	113.634	1.03633	-	4.72173	0.0597361	0.72649	1.57374	1.02276	6.53508	1.5777	14.6871	3.92702	13.712	2.52947	20.5244	3.69502	11452.3	0.802172	33.8567	21.6957	92.3199	0.235006
TGZ_30	10.4261	122.602	1.30693	-	4.89651	0.0390556	0.880253	1.4783	0.945378	7.52211	1.71059	15.0803	4.22809	14.224	2.65371	22.7753	3.89094	10961.9	0.932524	35.6753	23.492	98.1516	0.239344
TGZ_31	10.752	117.494	1.27024	-	4.88504	0.0297713	0.765561	1.70033	0.969766	6.72658	1.90783	15.3187	4.02552	14.2565	2.71553	21.9474	3.90784	11235.9	0.844899	34.3583	22.761	94.2853	0.241406
TGZ_32	8.6698	109.911	1.24616	0.010708	4.69629	0.0271467	0.46509	1.70773	0.988629	6.48835	1.59663	14.4512	3.73869	13.664	2.34822	21.6478	3.67779	11216.6	0.831406	32.122	21.375	87.7435	0.243608
TGZ_33	7.73265	121.101	1.31406	0.0178091	5.03587	0.0467865	0.885398	2.10147	1.03936	7.31151	1.74271	15.14	4.08292	14.8465	2.73225	21.4287	3.84087	11168.6	0.913487	36.0538	23.3615	97.4517	0.239724
TGZ_34	7.01132	119.895	1.12782	0.00720742	4.81629	0.0348762	0.80991	1.82314	0.992524	6.37782	1.62353	15.1475	4.04651	14.4974	2.66457	21.2457	3.842	11217.5	0.898961	35.1521	23.1395	95.9838	0.241077
TGZ_35	9.69534	108.983	1.23561	-	4.22297	0.0350647	0.856608	1.68294	0.820694	5.96786	1.48744	13.9179	3.57146	13.1721	2.35347	19.4969	3.7654	11294	0.826074	30.9102	20.4837	85.248	0.240284
TGZ_36	10.8821	119.062	1.28861	-	4.64589	0.0388756	0.577414	1.56949	1.05059	6.1157	1.67694	14.8164	4.06713	14.0426	2.66624	21.7528	3.87276	11298	0.831792	33.8873	22.6251	94.1784	0.240237
TGZ_37	7.9791	121.923	1.08767	-	4.84819	0.0471079	1.00077	1.64934	1.10371	7.17131	1.76097	15.3945	4.23129	14.9014	2.70376	22.9632	4.23052	11229.4	0.94049	36.3938	24.0965	100.032	0.240888
TGZ_38	7.70682	96.0701	0.985267	0.0108715	4.16082	0.0375611	0.683859	1.26593	0.942582	5.45247	1.28148	12.2385	3.35201	11.353	2.06057	17.4179	3.12371	11599.7	0.802965	28.021	18.5568	76.8118	0.241588
TGZ_39	6.29102	100.973	0.925955	-	4.09698	0.0298633	0.849015	1.47327	0.795054	5.77348	1.41808	13.0843	3.57632	12.1848	2.17009	18.5069	3.22834	11403.3	0.703485	28.805	19.1677	79.8038	0.240185
TGZ_40	7.70198	128.451	1.28521	-	5.16017	0.0501155	0.689163	2.13337	1.01635	6.81799	1.86405	15.6504	4.43136	15.7881	2.6662	24.2995	4.34306	11186.9	1.01757	38.248	26.2129	102.99	0.25452
mean	10.4234	131.725	1.39944	-	5.24635	0.0426193	0.811424	1.83562	1.08995	7.36508	1.86834	16.5397	4.44981	16.1742	2.86439	23.5428	4.32704	13264.4	0.962905	35.986	24.3863	98.9403
2SD	5.34127	78.0114	0.570888	-	1.77344	0.0316179	0.501201	1.17475	0.656382	4.44941	1.10602	9.55374	2.58137	9.77434	1.69276	13.3621	2.59649	3225.89	0.517824	14.9519	10.4369	40.7883
RSD (%)	51.2429	59.2229	40.7942	-	33.8032	74.1867	61.7681	63.9976	60.2214	60.4123	59.1979	57.7625	58.0108	60.4318	59.0965	56.7568	60.0062	24.3199	53.7772	41.5493	42.7983	41.2251
F critical	3.9	3.9	3.9	-	3.9	3.9	3.9	3.9	3.9	3.9	3.9	3.9	3.9	3.9	3.9	3.9	3.9	3.9	3.9	3.9	3.9	3.9
F value	141.028	113.275	269.124	-	347.876	39.3571	47.4921	75.7661	74.5531	88.1776	88.2873	101.733	102.443	136.966	122.486	111.879	132.615	693.176	21.0684	81.3521	113.883	86.6099
"-". The value was below detection limit.

## Sheet: Table S4
Table S4. U-Pb isotopic data of TGZ zircon obtained with CA-ID-TIMS.
	Dates (Ma)							Composition				Ratios
	206Pb/				207Pb/									206Pb/						207Pb/
Fraction	238U	±2σ	207Pb/	±2σ	206Pb	±2σ		Th/	Pb*	Pbc	Pb*/	206Pb/	208Pb/	238U		206Pb/		207Pb/		206Pb		Corr.
	<Th> a	abs	235U b	abs	<Th> a	abs	% disc c	U d	(pg) e	(pg) f	Pbc g	204Pb h	206Pb i	<Th> ia	±2σ %	238U i	±2σ %	235U i	±2σ %	<Th> ia	±2σ %	coef.
TGZ
TGZ_01	561.634	0.248446	562.423	0.517445	565.615	1.84619	0.779026	0.421892	163.343	0.511299	319.467	19567.1	0.130813	0.0910314	0.0461912	0.0910172	0.0461984	0.74003	0.119824	0.0589864	0.0782391	0.840661
TGZ_02	561.988	0.251782	562.44	0.508196	564.268	2.17092	0.485406	0.238763	24.8175	0.251726	98.5894	6356.26	0.074031	0.0910914	0.0467832	0.091076	0.0467911	0.740059	0.117679	0.0589499	0.0941682	0.554339
TGZ_03	562.006	0.259947	561.311	1.20989	558.491	5.93208	-0.546326	0.234207	12.2021	0.424137	28.7692	1870.21	0.0726185	0.0910944	0.048299	0.091079	0.0483071	0.738125	0.280587	0.0587939	0.270113	0.259588
TGZ_04	561.654	0.235308	561.443	0.388642	560.588	1.59741	-0.107479	0.231252	197.146	0.628076	313.889	20241.2	0.0717035	0.0910348	0.0437471	0.0910194	0.0437545	0.738352	0.0901144	0.0588505	0.0656172	0.591409
TGZ_05	561.892	0.461807	562.705	2.19937	565.993	10.7209	0.79966	0.422082	6.87812	0.397751	17.2925	1076.21	0.13087	0.0910751	0.0858218	0.0910609	0.0858351	0.740513	0.509112	0.0589966	0.491262	0.276492
TGZ_06	561.554	0.225137	561.986	0.438242	563.734	1.96924	0.468423	0.230728	134.004	0.291365	459.917	29651.5	0.0715413	0.0910179	0.0418633	0.0910025	0.0418704	0.739281	0.101542	0.0589355	0.0842984	0.457693
a Corrected for initial Th/U disequilibrium using radiogenic 208Pb and Th/U[magma] = 2.8 ± 1.0 (2s).
b Isotopic dates calculated using λ238 = 1.55125E-10 (Jaffey et al. 1971) and λ235 = 9.8485E-10 (Jaffey et al. 1971).
c % discordance = 100 - (100 * (206Pb/238U date) / (207Pb/206Pb date))
d Th contents calculated from radiogenic 208Pb and 230Th-corrected 206Pb/238U date of the sample, assuming concordance between U-Pb Th-Pb systems.
e Total mass of radiogenic Pb.
f Total mass of common Pb.
g Ratio of radiogenic Pb (including 208Pb) to common Pb.
h Measured ratio corrected for fractionation and spike contribution only.
i Measured ratios corrected for fractionation, tracer and blank.
All common Pb assumed to be laboratory blank. Total procedural blank less than 0.03 pg for U.
Blank isotopic composition: 206Pb/204Pb = 18.10 ± 1.51%, 207Pb/204Pb =15.55 ± 0.88%, 208Pb/204Pb = 37.82 ± 1.08% (1s).
Corr. coef. = correlation coefficient.
Ages calculated using the decay constants λ238 = 1.55125E-10 y-1 and λ235 = 9.8485E-10 y-1 (Jaffey et al. 1971).
238U/235U ratio of sample is predicted at 137.818 ± 0.045 (Hiess et al., 2012).
Weighted mean 206Pb/238U age (Th-corrected): 561.76 ± 0.11/0.18/0.63 Ma (n = 6, MSWD = 2.5)

## Sheet: Table S5
Table S5. U-Pb dating results of TGZ zircon obtained by LA-ICP-MS analysis.
	Rediogenic isotopic ratios								Isotopic age (Ma)
Sample/	207Pb	±1s	207Pb	±1s	206Pb	±1s	Rho		207Pb	±1s	207Pb	±1s	206Pb	±1s
spot #	206Pb	abs	235U	abs	238U	abs			206Pb		235U		238U
LA-ICP-MS results (CUG-Session)
TGZ_01	0.0582102	0.00121433	0.729279	0.0157983	0.0908197	0.000803955	0.26148		538.925	41.66	556.13	9.28404	560.383	4.76076
TGZ_02	0.0598286	0.00122043	0.742315	0.0150965	0.0902494	0.000793678	0.160651		598.17	44.435	563.755	8.80624	557.012	4.70248
TGZ_03	0.0593009	0.00128075	0.747322	0.0151216	0.0921776	0.000888436	0.0868208		588.915	50.915	566.669	8.79571	568.403	5.25283
TGZ_04	0.0545765	0.00147069	0.744207	0.0239803	0.0929359	0.000983828	0.1314		394.495	61.105	564.858	13.9653	572.877	5.81111
TGZ_05	0.0591685	0.00125349	0.739272	0.0168693	0.0903364	0.000784091	0.354537		572.255	46.2875	561.981	9.85565	557.526	4.64556
TGZ_06	0.0593211	0.00125948	0.736031	0.0158747	0.0899901	0.000767034	0.2469		588.915	50.915	560.087	9.29275	555.478	4.5463
TGZ_07	0.0573568	0.00127285	0.72095	0.0170078	0.0911375	0.00100813	0.381395		505.595	48.145	551.227	10.0418	562.261	5.96377
TGZ_08	0.0587853	0.0014561	0.734327	0.0186242	0.0909574	0.000952399	0.154621		566.7	53.6925	559.089	10.9104	561.197	5.63584
TGZ_09	0.0626255	0.00493994	0.751694	0.0180322	0.0914088	0.000954696	0.213746		694.455	169.268	569.207	10.4596	563.864	5.64714
TGZ_10	0.0588953	0.00128356	0.735779	0.0155034	0.0908754	0.000853713	0.116958		564.85	46.2875	559.939	9.07704	560.712	5.05401
TGZ_11	0.0589229	0.00141666	0.737548	0.0168218	0.091088	0.000760246	0.0351652		564.85	53.6925	560.973	9.83766	561.969	4.50196
TGZ_12	0.0584298	0.00139228	0.735875	0.0174735	0.0914965	0.000930148	0.241532		546.33	51.8425	559.995	10.228	564.381	5.50193
TGZ_13	0.0603934	0.00118507	0.745846	0.0154002	0.0894392	0.00072421	0.291295		616.685	42.5825	565.811	8.96498	552.22	4.29565
TGZ_14	0.0592676	0.00128991	0.736734	0.0160153	0.0903127	0.000785203	0.18917		575.96	52.7675	560.498	9.37114	557.386	4.65222
TGZ_15	0.0603151	0.00143444	0.751791	0.0158906	0.0900141	0.00103487	0.132088		616.685	51.8425	569.263	9.21875	555.621	6.12765
TGZ_16	0.0601503	0.00128198	0.740913	0.015674	0.0895684	0.000767454	0.142543		609.28	46.2875	562.938	9.1498	552.984	4.55044
TGZ_17	0.0604501	0.00122383	0.742477	0.0156445	0.0890752	0.000729455	0.251249		620.39	43.355	563.85	9.12446	550.065	4.32797
TGZ_18	0.0583399	0.00127439	0.734517	0.0168566	0.0915293	0.000912067	0.298015		542.63	48.1425	559.201	9.87513	564.575	5.39516
TGZ_19	0.058557	0.00127858	0.729465	0.0164943	0.0907569	0.000886824	0.234416		550.035	48.14	556.239	9.69132	560.012	5.24988
TGZ_20	0.0602326	0.00166592	0.74913	0.0209482	0.0905275	0.000972315	0.197695		612.98	61.1	567.719	12.1667	558.656	5.75554
TGZ_21	0.0600944	0.00179608	0.747988	0.0214036	0.0909672	0.000890692	0.0186224		605.575	63.72	567.056	12.439	561.255	5.27173
TGZ_22	0.058604	0.00173865	0.737207	0.0206704	0.0907675	0.000855303	0.111625		553.74	64.8025	560.774	12.0877	560.074	5.06386
TGZ_23	0.0598326	0.00181239	0.744506	0.0227087	0.0903033	0.00090476	0.120792		598.17	64.8025	565.032	13.2231	557.331	5.35785
TGZ_24	0.0605209	0.00182309	0.752125	0.0204108	0.0905457	0.000945157	0.180751		633.35	60.175	569.457	11.8347	558.764	5.59514
TGZ_25	0.0600261	0.00249096	0.744423	0.0295556	0.0905349	0.000892607	0.0431239		605.575	88.875	564.983	17.2078	558.7	5.28503
TGZ_26	0.0601362	0.00143406	0.746089	0.0174366	0.0903068	0.000806436	0.148556		609.28	46.13	565.953	10.147	557.351	4.77752
TGZ_27	0.0613827	0.00166069	0.752043	0.020314	0.0892554	0.00086812	0.133151		653.72	57.4	569.409	11.7792	551.132	5.14631
TGZ_28	0.058457	0.00161938	0.732468	0.0196101	0.0917396	0.00108286	0.0308057		546.33	59.2475	558.001	11.4996	565.817	6.40128
TGZ_29	0.0580706	0.00142741	0.731031	0.0181936	0.0915967	0.000858273	0.144891		531.52	55.5475	557.158	10.6787	564.973	5.0777
TGZ_30	0.0574523	0.00140745	0.732277	0.0177075	0.0928278	0.000803847	0.0353175		509.3	53.6975	557.889	10.3863	572.24	4.75182
TGZ_31	0.0588624	0.00128937	0.736907	0.0162065	0.0909257	0.000776822	0.173025		561.145	43.51	560.599	9.48188	561.009	4.60032
TGZ_32	0.0593092	0.00158311	0.741314	0.021066	0.0904692	0.000881905	0.27355		588.915	57.395	563.172	12.2899	558.312	5.22218
TGZ_33	0.0594993	0.00180999	0.741972	0.0216366	0.091216	0.000867249	-0.0342534		587.065	66.655	563.555	12.6176	562.725	5.13232
TGZ_34	0.0575984	0.00209835	0.732529	0.0259869	0.0926803	0.00107444	0.0849649		522.26	80.39	558.036	15.2349	571.369	6.34632
TGZ_35	0.0594665	0.00169989	0.739853	0.0209331	0.090851	0.000914896	0.10177		583.36	67.58	562.32	12.2226	560.568	5.41507
TGZ_36	0.0602429	0.00187489	0.744534	0.0218984	0.0905225	0.00101072	0.109591		612.98	68.505	565.048	12.7515	558.626	5.98227
TGZ_37	0.0588801	0.00144611	0.742213	0.0180508	0.0907142	0.000902651	0.215299		561.145	53.6925	563.696	10.5272	559.76	5.34347
TGZ_38	0.0582882	0.00134212	0.73638	0.0178964	0.0915313	0.000836714	0.281344		538.925	45.365	560.291	10.4722	564.587	4.9509
TGZ_39	0.0595081	0.00138946	0.738702	0.0178452	0.0899843	0.000920618	0.284102		587.065	17.5875	561.648	10.4284	555.444	5.453
TGZ_40	0.0603846	0.00150712	0.746221	0.0174739	0.0903169	0.000985276	0.128198		616.685	54.4625	566.029	10.1679	557.411	5.83314
TGZ_41	0.0590188	0.00135265	0.739635	0.0169589	0.0910894	0.000915128	0.234554		568.55	49.99	562.193	9.90589	561.977	5.4153
TGZ_42	0.0588138	0.00191355	0.739761	0.023453	0.0907603	0.000994574	0.082327		561.145	71.13	562.266	13.6933	560.032	5.88573
TGZ_43	0.0577201	0.00161816	0.725728	0.0200481	0.0917965	0.000926078	0.13376		520.41	65.7325	554.043	11.8019	566.153	5.47648
TGZ_44	0.05599	0.00169623	0.738302	0.0166192	0.0908149	0.00118569	0.22132		453.75	66.66	561.414	9.71517	560.355	7.01364
TGZ_45	0.0586882	0.00131301	0.735687	0.0178632	0.0908401	0.00092399	0.439591		553.74	52.7675	559.885	10.457	560.504	5.46878
TGZ_46	0.0582414	0.0018729	0.734498	0.0241614	0.0917512	0.000966248	0.17306		538.925	65.73	559.19	14.1493	565.886	5.71354
TGZ_47	0.0581433	0.00209792	0.729266	0.0259305	0.0915738	0.00103379	0.139284		600.025	79.615	556.122	15.2305	564.838	6.11275
TGZ_48	0.059417	0.00157976	0.744652	0.0206794	0.0911478	0.000920039	0.221766		583.36	57.3975	565.117	12.0415	562.322	5.44399
TGZ_49	0.0591231	0.00147727	0.740525	0.0194786	0.0907715	0.000793533	0.285324		572.255	58.3225	562.712	11.3698	560.098	4.69949
TGZ_50	0.0591944	0.00147433	0.735364	0.0182198	0.0904178	0.000774592	0.131009		575.96	53.6925	559.697	10.6674	558.008	4.5892
TGZ_51	0.0586721	0.00149384	0.730133	0.0188583	0.0905526	0.000817577	0.131711		553.74	55.545	556.631	11.0741	558.805	4.84223
TGZ_52	0.0579789	0.00122629	0.728621	0.015182	0.09134	0.000689782	0.139255		527.815	46.2925	555.744	8.92584	563.457	4.08581
TGZ_53	0.0582998	0.00111302	0.732428	0.0143285	0.0912093	0.000676749	0.209861		542.63	42.585	557.977	8.40654	562.685	4.00949
TGZ_54	0.0579657	0.000953343	0.733274	0.0121215	0.0918218	0.00064071	0.220074		527.815	32.405	558.473	7.11114	566.303	3.79527
TGZ_55	0.0596492	0.0013019	0.744112	0.0168897	0.0904399	0.000720604	0.257869		590.77	48.1375	564.802	9.84032	558.138	4.27068
TGZ_56	0.0595347	0.00169201	0.735256	0.0211148	0.090107	0.00094798	0.160187		587.065	65.73	559.633	12.3612	556.17	5.61398
TGZ_57	0.0588184	0.00162835	0.731723	0.0191452	0.0909389	0.000850162	0.0561926		561.145	61.1	557.564	11.2321	561.087	5.03278
TGZ_58	0.0587635	0.00199112	0.73993	0.0224737	0.0910036	0.000827466	-0.0415412		566.7	74.0625	562.365	13.1207	561.47	4.89864
TGZ_59	0.0577505	0.00178985	0.728547	0.0232329	0.0914188	0.000814479	0.2072		520.41	68.51	555.7	13.6527	563.922	4.82031
TGZ_60	0.0587274	0.00153782	0.737626	0.0197947	0.0912046	0.000783732	0.154231		566.7	57.395	561.019	11.5734	562.657	4.63994
TGZ_61	0.0584039	0.00167972	0.730524	0.0211448	0.0909318	0.000874634	0.179853		546.33	62.9525	556.861	12.4125	561.046	5.17716
TGZ_62	0.0600673	0.00124333	0.743401	0.0152492	0.0900231	0.000761198	0.14542		605.575	44.435	564.388	8.88964	555.674	4.51173
TGZ_63	0.0600689	0.00144148	0.745505	0.0193371	0.0899808	0.000921814	0.351262		605.575	51.84	565.613	11.2552	555.424	5.46008
TGZ_64	0.0598532	0.00129123	0.74872	0.0166804	0.0908194	0.000746826	0.222842		598.17	47.0575	567.481	9.69306	560.381	4.42388
TGZ_65	0.0592306	0.00140605	0.741363	0.0175159	0.0911416	0.000845439	0.200921		575.96	51.8425	563.201	10.2206	562.285	5.00403
TGZ_66	0.0592338	0.00126776	0.737685	0.0152306	0.0905907	0.000781778	0.0917629		575.96	46.2875	561.054	8.90786	559.029	4.63089
TGZ_67	0.0588048	0.00131008	0.731199	0.0165375	0.0902247	0.000789756	0.23832		561.145	49.99	557.257	9.70696	556.866	4.67944
TGZ_68	0.0569167	0.00147185	0.7298	0.0165708	0.090677	0.00106768	0.329125		487.08	55.55	556.436	9.73433	559.54	6.31774
TGZ_69	0.057085	0.00149133	0.723654	0.0192302	0.0921028	0.000994454	0.259919		494.485	57.4025	552.821	11.3345	567.962	5.87802
TGZ_70	0.0593327	0.00134732	0.737085	0.016802	0.0901476	0.000778622	0.180243		588.915	49.99	560.703	9.82874	556.41	4.61405
TGZ_71	0.0594787	0.00152417	0.74581	0.0181309	0.0905629	0.000825617	0.136979		583.36	55.545	565.79	10.5522	558.865	4.88962
TGZ_72	0.0596551	0.00165193	0.737603	0.0197714	0.0900581	0.00101491	0.170239		590.77	59.2475	561.006	11.5599	555.881	6.00953
TGZ_73	0.0580334	0.00166315	0.72823	0.0215742	0.090857	0.00100702	0.293369		531.52	57.245	555.514	12.681	560.604	5.95866
TGZ_74	0.0575275	0.00137903	0.721155	0.0174874	0.0910507	0.000805321	0.174452		522.26	53.7	551.349	10.3234	561.748	4.76785
TGZ_75	0.0577408	0.00155009	0.723568	0.0187944	0.090776	0.00081186	0.0961077		520.41	58.1725	552.771	11.0785	560.125	4.80756
TGZ_76	0.0601143	0.00145267	0.743947	0.0172375	0.0907066	0.00102332	0.213269		609.28	52.61	564.706	10.0436	559.715	6.05568
TGZ_77	0.058402	0.00144619	0.725513	0.0181917	0.0909028	0.00109802	0.226539		546.33	49.065	553.916	10.7116	560.874	6.49551
TGZ_78	0.0589594	0.0026948	0.735813	0.0173631	0.0901766	0.000992587	0.119998		564.85	99.985	559.959	10.1639	556.582	5.87704
TGZ_79	0.0584431	0.00141961	0.732172	0.0177795	0.0909624	0.000930225	0.31202		546.33	49.065	557.827	10.4291	561.226	5.50498
TGZ_80	0.0603546	0.00134719	0.744691	0.0169869	0.0896107	0.000935789	0.267779		616.685	48.14	565.139	9.89356	553.234	5.54442
TGZ_81	0.0582457	0.00131627	0.726832	0.0163657	0.0908453	0.000831791	0.144845		538.925	49.9925	554.692	9.6305	560.534	4.92483
TGZ_82	0.058261	0.00165478	0.734437	0.0184707	0.0910783	0.000909512	0.036846		538.925	67.58	559.154	10.8199	561.911	5.38223
TGZ_83	0.0599624	0.0015166	0.751665	0.0188302	0.0914678	0.000948162	0.111971		611.13	55.545	569.19	10.9221	564.212	5.60831
TGZ_84	0.061114	0.00175315	0.757692	0.0211209	0.0903949	0.00088508	0.0893386		642.61	58.325	572.677	12.2073	557.872	5.24126
TGZ_85	0.0582314	0.00180232	0.733357	0.02396	0.0916678	0.00101913	0.225298		538.925	63.8775	558.521	14.0407	565.393	6.02583
TGZ_86	0.0580314	0.00167656	0.731339	0.0220776	0.0909176	0.000865461	0.316075		531.52	64.805	557.339	12.9535	560.962	5.12312
TGZ_87	0.058541	0.00160913	0.730024	0.0206862	0.0902609	0.000880171	0.246069		550.035	61.1	556.567	12.147	557.08	5.2129
TGZ_88	0.0589939	0.00195823	0.72985	0.0236399	0.0901184	0.000937713	0.0825406		568.55	72.21	556.465	13.8813	556.237	5.55329
TGZ_89	0.0593111	0.00135655	0.742646	0.0176045	0.0905943	0.000869319	0.231685		588.915	49.99	563.949	10.2647	559.051	5.14733
TGZ_90	0.0594439	0.00159767	0.740644	0.0207825	0.0901191	0.000901746	0.305155		583.36	58.17	562.781	12.1293	556.241	5.34093
TGZ_91	0.0592257	0.00173132	0.737983	0.0214147	0.09066	0.000904143	0.157059		575.96	64.8025	561.228	12.5169	559.44	5.35253
TGZ_92	0.0608062	0.00211183	0.746977	0.0264381	0.0896057	0.00114815	0.192753		631.5	69.4325	566.469	15.3713	553.204	6.79932
TGZ_93	0.058725	0.00169109	0.727446	0.0203572	0.0907143	0.000952942	0.0340892		566.7	61.8725	555.053	11.9718	559.76	5.64025
TGZ_94	0.0598481	0.00182901	0.742995	0.0227837	0.09065	0.000993094	0.162947		598.17	65.575	564.152	13.2782	559.38	5.87757
TGZ_95	0.0579486	0.00163725	0.72598	0.019529	0.0916297	0.000807435	-0.00851054		527.815	61.1025	554.191	11.495	565.168	4.77791
TGZ_96	0.0593799	0.002061	0.738085	0.025769	0.0907166	0.00102888	0.220322		588.915	74.0625	561.287	15.059	559.774	6.08848
TGZ_97	0.0582788	0.00192481	0.726943	0.0241712	0.0908358	0.00101054	0.212279		538.925	72.21	554.757	14.2168	560.478	5.97956
TGZ_98	0.059269	0.00149464	0.739427	0.0194479	0.0906227	0.000947428	0.295674		575.96	55.545	562.071	11.3591	559.219	5.60816
TGZ_99	0.0592248	0.00145118	0.743305	0.0180832	0.0912755	0.000990718	0.283561		575.96	53.6925	564.333	10.5395	563.076	5.86029
TGZ_100	0.0594885	0.00151955	0.742639	0.018935	0.0907888	0.000953049	0.218577		583.36	55.545	563.945	11.0395	560.201	5.64051
TGZ_101	0.0603171	0.00199004	0.739286	0.0231297	0.0897897	0.0010866	0.163812		616.685	70.3575	561.989	13.5084	554.293	6.43449
TGZ_102	0.0600564	0.00222416	0.736891	0.0256515	0.0904219	0.000914013	-0.0808481		605.575	79.6175	560.589	15.0007	558.032	5.41191
TGZ_103	0.0591145	0.00177995	0.731401	0.0211546	0.0905383	0.0008929	0.021889		572.255	64.8025	557.375	12.4119	558.72	5.28675
TGZ_104	0.0594022	0.00169156	0.744263	0.0213211	0.0912832	0.000917718	0.163801		583.36	61.1	564.89	12.4175	563.122	5.42965
TGZ_105	0.0578868	0.00139437	0.727117	0.0175073	0.0913094	0.000792749	0.163319		524.11	51.8475	554.859	10.2996	563.277	4.69267
TGZ_106	0.058489	0.00174978	0.732173	0.0219566	0.0910144	0.000775997	0.0926432		546.33	66.655	557.828	12.8763	561.534	4.5951
TGZ_107	0.05648	0.0023835	0.73516	0.023567	0.0910955	0.00116178	-0.00316569		472.265	92.5825	559.577	13.7962	562.013	6.87073
TGZ_108	0.0583311	0.0019246	0.732027	0.0230559	0.0912575	0.000929274	0.0836554		542.63	67.58	557.742	13.5216	562.97	5.49793
TGZ_109	0.0596186	0.00198168	0.743262	0.0233979	0.0901343	0.00108808	0.107945		590.77	72.21	564.307	13.6338	556.331	6.44126
TGZ_110	0.0591563	0.00132707	0.737119	0.0171648	0.090157	0.000821431	0.317951		572.255	48.14	560.723	10.0404	556.465	4.86665
TGZ_111	0.0582415	0.0013564	0.729419	0.0174382	0.0909224	0.000853784	0.230697		538.925	51.845	556.212	10.2454	560.99	5.05422
TGZ_112	0.0595665	0.00145982	0.742835	0.0180383	0.0908232	0.000807903	0.112232		587.065	19.44	564.059	10.5162	560.404	4.78403
TGZ_113	0.0590252	0.00132546	0.740705	0.0171747	0.0907748	0.000838863	0.340809		568.55	49.99	562.817	10.0256	560.118	4.96685
TGZ_114	0.0607463	0.00139239	0.750202	0.0173033	0.0897412	0.00072764	0.131243		631.5	45.3625	568.342	10.046	554.006	4.31477
TGZ_115	0.0596185	0.00127743	0.739515	0.0148439	0.0903478	0.00079628	0.0689787		590.77	46.285	562.123	8.67307	557.594	4.71743
TGZ_116	0.0594228	0.00164715	0.736368	0.0195308	0.0906551	0.00102825	0.118668		583.36	61.1	560.284	11.4275	559.41	6.08505
TGZ_117	0.0585608	0.00171321	0.731957	0.0208624	0.0907808	0.00109323	0.199614		550.035	62.95	557.701	12.2367	560.153	6.46796
TGZ_118	0.0586101	0.00219964	0.734813	0.026005	0.0899028	0.000981739	0.13947		553.74	76.84	559.374	15.2254	554.962	5.81439
TGZ_119	0.0606596	0.00513267	0.737505	0.0324375	0.0909038	0.00125612	-0.141364		627.795	182.23	560.949	18.9601	560.88	7.4289
TGZ_120	0.0579514	0.00177922	0.724546	0.0214025	0.0915989	0.00108855	0.10855		527.815	68.51	553.347	12.6071	564.986	6.43563
TGZ_121	0.0593467	0.00216493	0.739609	0.0255305	0.0903216	0.000988871	0.0970534		588.915	79.615	562.177	14.9067	557.439	5.85434
TGZ_122	0.0596835	0.00187909	0.740219	0.0224281	0.0911187	0.000998692	-0.0070713		590.77	66.655	562.533	13.0919	562.15	5.90815
TGZ_123	0.0587361	0.00195973	0.728173	0.0230012	0.0910125	0.00100705	0.103676		566.7	72.21	555.48	13.5196	561.522	5.95801
TGZ_124	0.0600029	0.00197468	0.738937	0.0225976	0.090448	0.00097685	0.0264235		603.41	70.3575	561.785	13.2005	558.186	5.78271
TGZ_125	0.0585365	0.00147945	0.731205	0.0190119	0.090728	0.00098353	0.287163		550.035	55.545	557.26	11.1572	559.841	5.82071
TGZ_126	0.0591358	0.00168894	0.734196	0.0208012	0.0903756	0.000966792	0.180202		572.255	61.1	559.013	12.1852	557.758	5.7237
TGZ_127	0.058867	0.00152441	0.737553	0.0188158	0.0912923	0.000975432	0.135737		561.145	55.545	560.976	11.0021	563.175	5.77003
TGZ_128	0.0591264	0.00135598	0.742041	0.0172827	0.0908943	0.000804604	0.288167		572.255	49.99	563.596	10.0809	560.824	4.76428
TGZ_129	0.0583099	0.00144738	0.735615	0.0187385	0.0913051	0.000839693	0.281601		542.63	53.695	559.843	10.9692	563.251	4.96944
TGZ_130	0.057374	0.00147972	0.724347	0.0187602	0.0915224	0.000788008	0.190191		505.595	52.7725	553.23	11.0534	564.535	4.66386
TGZ_131	0.0577616	0.00183353	0.735894	0.0193389	0.0921764	0.00082947	-0.0504261		520.41	69.2825	560.007	11.3184	568.396	4.90544
TGZ_132	0.0590608	0.0015547	0.744776	0.0198858	0.0913593	0.000829874	0.261715		568.55	62.025	565.189	11.579	563.571	4.91131
TGZ_133	0.0589247	0.00161399	0.732392	0.0198893	0.0905639	0.000916087	0.125551		564.85	65.73	557.956	11.6636	558.871	5.42347
TGZ_134	0.055114	0.00182882	0.735606	0.0197016	0.0906999	0.00104638	0.23893		416.715	78.695	559.838	11.5323	559.675	6.19186
TGZ_135	0.0590204	0.001732	0.739004	0.0221267	0.0908844	0.000842122	0.165572		568.55	64.805	561.824	12.9252	560.765	4.9856
TGZ_136	0.0573348	0.00147171	0.717839	0.0180511	0.0909234	0.000765701	0.100954		505.595	52.7725	549.391	10.6762	560.996	4.53476
TGZ_137	0.0584516	0.00193626	0.739135	0.0238172	0.0923389	0.00101002	0.0983375		546.33	72.21	561.901	13.9108	569.355	5.96855
TGZ_138	0.0580775	0.00152252	0.746737	0.0164291	0.0913057	0.000900475	0.16421		531.52	57.4	566.329	9.55807	563.254	5.32786
TGZ_139	0.0579366	0.00133994	0.734233	0.0178949	0.0919194	0.000970772	-0.0642296		527.815	49.995	559.034	10.4842	566.879	5.73936
TGZ_140	0.0592913	0.00198564	0.739509	0.0250925	0.0910863	0.00100863	0.147581		577.5	74.0625	562.119	14.6519	561.958	5.96699
TGZ_141	0.0593637	0.001931	0.738803	0.0233075	0.0910548	0.000919278	0.0796604		588.915	70.3575	561.707	13.6159	561.772	5.43995
TGZ_142	0.060032	0.00239287	0.743051	0.0278039	0.0903768	0.000968025	0.027918		605.575	85.9425	564.185	16.2012	557.765	5.73098
TGZ_143	0.0558339	0.00160001	0.73315	0.0187718	0.091436	0.000971044	0.303566		455.6	60.18	558.4	11.0042	564.024	5.74342
TGZ_144	0.05926	0.00147093	0.739282	0.018701	0.0905815	0.000911181	0.221062		575.96	55.545	561.986	10.9242	558.975	5.39443
TGZ_145	0.0591615	0.00218224	0.735889	0.0265554	0.0910312	0.00101376	0.0591138		572.255	74.9875	560.004	15.5379	561.633	5.99753
TGZ_146	0.0592366	0.00183885	0.742099	0.0228171	0.0911902	0.00097638	0.241431		575.96	68.5075	563.629	13.3045	562.572	5.77615
TGZ_147	0.0602768	0.00185174	0.740655	0.0220454	0.0903034	0.000988047	0.0505222		612.98	66.655	562.788	12.8655	557.331	5.84957
TGZ_148	0.0580812	0.00173117	0.731853	0.0217743	0.0913847	0.00103838	0.199543		531.52	66.655	557.64	12.7719	563.721	6.14086
TGZ_149	0.0589706	0.00215746	0.729047	0.0244389	0.0905132	0.00099022	-0.0249054		564.85	79.6175	555.994	14.3567	558.572	5.86131
TGZ_150	0.0593844	0.00190676	0.738147	0.0233017	0.0907716	0.00095614	0.104252		588.915	70.3575	561.324	13.6176	560.099	5.65884
TGZ_151	0.0587816	0.00201269	0.729537	0.0247691	0.090645	0.00101723	0.151034		566.7	74.0625	556.281	14.5465	559.35	6.02008
TGZ_152	0.0592656	0.00194754	0.740463	0.0244097	0.0910349	0.000927199	0.134631		575.96	74.9875	562.676	14.2457	561.655	5.48678
TGZ_153	0.0606978	0.00248757	0.742282	0.0295421	0.0896363	0.000964288	0.0333864		627.795	91.6525	563.736	17.2211	553.386	5.71266
GJ-1_01	0.0597349	0.00102644	0.815867	0.0138667	0.0991331	0.000771895	0.278549		594.47	32.4	605.74	7.7648	609.326	4.53911
GJ-1_02	0.0591341	0.000889886	0.803796	0.0122684	0.0986006	0.000704459	0.219044		572.255	33.325	598.968	6.91803	606.203	4.14659
GJ-1_03	0.059604	0.000898012	0.810789	0.0128069	0.0985511	0.000708264	0.329934		590.77	26.845	602.897	7.19304	605.912	4.16903
GJ-1_04	0.059175	0.000977208	0.815981	0.0130557	0.100202	0.000831615	0.136189		572.255	35.1775	605.804	7.31154	615.593	4.88401
GJ-1_05	0.0616882	0.00104833	0.830759	0.0140407	0.0978195	0.000698013	0.134034		664.83	35.1825	614.033	7.79847	601.617	4.1116
GJ-1_06	0.0598749	0.000891256	0.81944	0.0120853	0.0991625	0.000736931	0.195978		598.17	33.325	607.736	6.75717	609.499	4.33449
GJ-1_07	0.0607255	0.000993	0.828764	0.0140998	0.0988519	0.000876598	0.384823		629.34	35.18	612.926	7.83973	607.677	5.15302
GJ-1_08	0.0604258	0.00103699	0.82216	0.0143153	0.0984285	0.000739507	0.21794		620.39	33.1725	609.253	7.98783	605.192	4.35228
GJ-1_09	0.0613858	0.00109186	0.828656	0.0155506	0.0976581	0.000784736	0.355769		653.72	43.515	612.866	8.64471	600.67	4.62006
GJ-1_10	0.0599229	0.00109119	0.815785	0.0139618	0.0981352	0.00086175	0.326943		611.13	38.88	605.694	7.81825	603.471	5.06924
GJ-1_11	0.0590945	0.000903565	0.809914	0.0128448	0.0992689	0.000782271	0.341563		572.255	5.5525	602.406	7.21774	610.123	4.59927
GJ-1_12	0.0595453	0.000995809	0.808864	0.0138512	0.0987115	0.000785729	0.217918		587.065	41.6575	601.816	7.78593	606.853	4.6217
GJ-1_13	0.0599552	0.000979317	0.811424	0.0138388	0.0983592	0.000805806	0.341498		611.13	35.945	603.253	7.76807	604.786	4.74065
GJ-1_14	0.060566	0.00108844	0.819408	0.0153537	0.0981958	0.000734544	0.289602		633.35	38.8825	607.718	8.57863	603.827	4.32409
GJ-1_15	0.0595196	0.000919098	0.81035	0.0128041	0.0986848	0.000748872	0.318085		587.065	33.325	602.65	7.1932	606.697	4.40612
GJ-1_16	0.0593513	0.00106903	0.809542	0.0146372	0.0989091	0.000799172	0.239487		588.915	40.7325	602.197	8.22355	608.013	4.69958
GJ-1_17	0.0593263	0.00106029	0.807319	0.0143757	0.0988051	0.000774578	0.149592		588.915	38.88	600.949	8.08683	607.403	4.55607
GJ-1_18	0.0603491	0.000976758	0.820447	0.0135241	0.0982572	0.00079167	0.296775		616.685	30.55	608.298	7.55462	604.188	4.65829
GJ-1_19	0.0612695	0.00103674	0.82686	0.0137546	0.0977534	0.000713169	0.208532		650.015	35.1825	611.869	7.65625	601.23	4.20056
GJ-1_20	0.0598959	0.00118133	0.816125	0.0160904	0.0989487	0.00079323	0.18607		598.17	37.955	605.884	9.00547	608.245	4.66465
GJ-1_21	0.0608752	0.00111631	0.824689	0.0153194	0.0983361	0.000727739	0.223852		635.2	38.8825	610.661	8.53487	604.65	4.28375
GJ-1_22	0.0601724	0.00107615	0.813784	0.0144991	0.0980067	0.000807921	0.233619		609.28	37.7975	604.574	8.12724	602.717	4.75447
GJ-1_23	0.0593	0.00099885	0.810297	0.0137692	0.0991146	0.000717006	0.203416		588.915	35.175	602.621	7.73392	609.218	4.21816
GJ-1_24	0.060156	0.00110006	0.816264	0.015168	0.0985241	0.000754374	0.172793		609.28	40.7325	605.962	8.48971	605.754	4.43892
GJ-1_25	0.0607801	0.0011129	0.824795	0.0153691	0.0981769	0.000728589	0.268866		631.5	40.7325	610.72	8.56202	603.716	4.2893
GJ-1_26	0.0595657	0.00102986	0.814652	0.0141528	0.0992786	0.000875558	0.231652		587.065	41.6575	605.061	7.92981	610.18	5.14503
GJ-1_27	0.0594738	0.00103863	0.809513	0.0150019	0.0984465	0.000764667	0.409153		583.36	37.03	602.181	8.42807	605.298	4.49946
91500_01	0.0743378	0.00134353	1.84204	0.0341091	0.179799	0.00150839	0.256126		1050.01	37.04	1060.59	12.2076	1065.88	8.26193
91500_02	0.0738533	0.00137402	1.84861	0.0354473	0.181541	0.00147256	0.303969		1038.89	38.12	1062.93	12.6558	1075.39	8.05516
91500_03	0.0756382	0.0015595	1.85616	0.0377145	0.178721	0.00143833	0.0717648		1087.04	42.13	1065.62	13.4273	1059.99	7.88701
91500_04	0.0770245	0.00153221	1.8851	0.0378101	0.177739	0.00152829	0.201474		1121.91	38.89	1075.86	13.327	1054.61	8.38454
91500_05	0.0746243	0.00145182	1.84306	0.0344662	0.179365	0.00149602	0.117259		1058.34	38.89	1060.95	12.3305	1063.5	8.19738
91500_06	0.075894	0.00139936	1.86441	0.0359195	0.177928	0.00143284	0.302083		1092.28	37.0375	1068.55	12.7535	1055.65	7.86217
91500_07	0.0758975	0.00153266	1.8778	0.0366856	0.179799	0.00149184	0.132691		1092.28	40.4325	1073.29	12.9644	1065.87	8.17168
91500_08	0.0754472	0.0014336	1.84606	0.0352047	0.178144	0.00157967	0.233267		1079.63	37.805	1062.03	12.5807	1056.83	8.66227
91500_09	0.0741597	0.00136099	1.82602	0.0352763	0.178864	0.00160823	0.309728		1055.56	37.0375	1054.85	12.695	1060.76	8.81295
91500_10	0.0758751	0.00173152	1.86509	0.0420539	0.179079	0.00193047	0.183273		1091.66	40.585	1068.79	14.9216	1061.94	10.5701
91500_11	0.0746651	0.00153883	1.84638	0.037425	0.179762	0.00163926	0.17436		1061.12	42.5925	1062.14	13.3701	1065.67	8.97564
91500_12	0.0756381	0.00169941	1.85287	0.0438568	0.177673	0.00174554	0.327884		1087.04	45.835	1064.45	15.6261	1054.25	9.57181
91500_13	0.0742832	0.00176037	1.83139	0.0428531	0.179931	0.00169414	0.0660919		1050.01	42.44	1056.78	15.3846	1066.6	9.27362
91500_14	0.0756943	0.0021717	1.87094	0.0550868	0.179388	0.00193052	0.263932		1087.04	57.875	1070.86	19.4965	1063.63	10.5676
91500_15	0.0762184	0.00214484	1.88663	0.0544272	0.180146	0.00194877	0.19446		1101.85	62.035	1076.4	19.159	1067.77	10.6605
91500_16	0.0762779	0.00128809	1.89356	0.032938	0.179772	0.00137226	0.285928		1101.85	5.5575	1078.83	11.5816	1065.73	7.52025
91500_17	0.0744128	0.00130887	1.86011	0.0353164	0.180621	0.00135105	0.39207		1053.71	35.1875	1067.02	12.5589	1070.36	7.39959
91500_18	0.0755354	0.00152668	1.86553	0.0380355	0.179204	0.00130616	0.18793		1083.34	40.7375	1068.95	13.4972	1062.63	7.16345
91500_19	0.0754447	0.00150242	1.86509	0.0374647	0.179521	0.00143569	0.145523		1079.63	40.275	1068.79	13.2973	1064.36	7.86749
91500_20	0.0758975	0.00155543	1.86202	0.0385093	0.178231	0.0017404	0.155652		1092.28	41.5125	1067.7	13.6815	1057.3	9.53927
91500_21	0.0752688	0.00159505	1.84608	0.0397342	0.178021	0.00164931	0.250878		1075.93	42.59	1062.03	14.1942	1056.15	9.04345
91500_22	0.0748206	0.0015097	1.85725	0.0387985	0.179924	0.00152738	0.294774		1064.82	36.11	1066.01	13.8069	1066.56	8.36457
91500_23	0.0751726	0.00190117	1.86531	0.0358491	0.177963	0.00189938	0.231084		1073.15	51.39	1068.87	12.7247	1055.84	10.41
91500_24	0.0753759	0.00161751	1.86145	0.0405985	0.179391	0.00151816	0.195641		1079.63	42.59	1067.5	14.4246	1063.65	8.31793
91500_25	0.0763336	0.00163199	1.85871	0.0391849	0.177333	0.00153293	0.14617		1105.56	42.5925	1066.53	13.937	1052.39	8.4127
91500_26	0.0747564	0.00146531	1.85281	0.0365617	0.179697	0.00151347	0.243046		1062.04	39.97	1064.43	13.0333	1065.32	8.29027
91500_27	0.0761266	0.00146041	1.85923	0.0347103	0.177798	0.00148306	0.160256		1098.15	37.5	1066.71	12.3478	1054.94	8.13716
91500_28	0.0739191	0.00154536	1.83483	0.0378888	0.180372	0.00171109	0.213639		1038.89	41.51	1058.01	13.5901	1069.01	9.36264
91500_29	0.0738432	0.00144968	1.83653	0.0381682	0.180189	0.00170355	0.336872		1038.89	38.89	1058.62	13.6819	1068.01	9.32298
91500_30	0.0729913	0.0017785	1.81884	0.0451897	0.180689	0.00162848	0.262129		1012.96	48.615	1052.27	16.2936	1070.74	8.9101
91500_31	0.0748986	0.00215554	1.84958	0.0523932	0.180542	0.00203139	0.151062		1065.74	58.4875	1063.28	18.6831	1069.93	11.1075
91500_32	0.0747561	0.00235471	1.83643	0.0554216	0.180622	0.00222173	-0.000697328		1061.12	62.9625	1058.58	19.8529	1070.37	12.1448
91500_33	0.0732286	0.00206648	1.83499	0.0524656	0.181934	0.00185199	0.279168		1020.37	57.41	1058.07	18.8049	1077.53	10.1177
91500_34	0.0753494	0.00156611	1.86327	0.0379445	0.18003	0.00176825	0.170523		1079.63	42.59	1068.15	13.4756	1067.14	9.67696
91500_35	0.0755216	0.00193641	1.85494	0.0466039	0.178846	0.00178457	0.193187		1083.34	50.7725	1065.19	16.5909	1060.67	9.77557
91500_36	0.0732414	0.00211464	1.81667	0.0531253	0.180385	0.00187967	0.211783		1020.37	59.26	1051.49	19.1645	1069.08	10.2816
91500_37	0.0749479	0.00210641	1.85689	0.054491	0.179565	0.00189296	0.280085		1133.34	57.4075	1065.88	19.3805	1064.6	10.3611
91500_38	0.0758822	0.00130511	1.86647	0.0343657	0.178167	0.00139626	0.341936		1091.66	35.1875	1069.28	12.195	1056.95	7.66102
91500_39	0.0753089	0.00151032	1.86045	0.0365919	0.179706	0.00152232	0.116635		1076.86	40.7375	1067.15	13.0094	1065.37	8.33849
91500_40	0.0755013	0.00164025	1.86952	0.0396246	0.180402	0.00159591	0.0639054		1083.34	43.0525	1070.36	14.0401	1069.17	8.73469
91500_41	0.0762234	0.00161891	1.88595	0.0405559	0.179589	0.00156905	0.204378		1101.85	42.595	1076.16	14.2878	1064.73	8.59405
91500_42	0.0775481	0.0015785	1.91142	0.0399726	0.179021	0.00169309	0.290769		1144.45	40.7425	1085.08	13.9603	1061.62	9.27486
91500_43	0.0753763	0.0016175	1.85678	0.0395488	0.178841	0.00167187	0.235776		1079.63	42.59	1065.84	14.0755	1060.64	9.16043
91500_44	0.0759044	0.00148196	1.85294	0.0381821	0.176829	0.00167551	0.361079		1092.28	38.89	1064.48	13.6086	1049.63	9.19558
91500_45	0.0738161	0.00152402	1.82566	0.0379505	0.179468	0.00152849	0.194606		1036.73	41.5125	1054.72	13.6561	1064.07	8.37373
91500_46	0.0764146	0.00154176	1.86225	0.0383771	0.177082	0.00154234	0.222499		1105.56	40.74	1067.79	13.6336	1051.01	8.46582
91500_47	0.0739373	0.00135749	1.84394	0.0338263	0.181046	0.00147072	0.161211		1038.89	32.41	1061.27	12.0986	1072.69	8.04838
91500_48	0.0741631	0.00147751	1.83538	0.0356467	0.179874	0.00152374	0.154769		1055.56	40.7425	1058.21	12.7858	1066.28	8.34506
91500_49	0.0758382	0.00155868	1.85993	0.0394282	0.177919	0.00155103	0.243329		1100	40.7425	1066.96	14.0173	1055.59	8.50745
91500_50	0.0737292	0.00216301	1.82989	0.0523754	0.180814	0.00195801	0.161897		1035.19	59.255	1056.24	18.8063	1071.42	10.705
91500_51	0.0766057	0.00209865	1.86136	0.0467747	0.178458	0.00207366	-0.0259904		1110.8	54.785	1067.47	16.6143	1058.55	11.3577
91500_52	0.0751455	0.00287338	1.85877	0.0677687	0.180494	0.00215418	0.139712		1072.22	76.39	1066.55	24.0812	1069.67	11.7777
91500_53	0.0745181	0.00236273	1.83813	0.0574769	0.180419	0.00187393	0.101196		1055.25	63.735	1059.19	20.5758	1069.26	10.25
91500_54	0.0770899	0.00242428	1.89115	0.0568797	0.1793	0.00190197	0.0593303		1124.08	61.8825	1077.98	19.9898	1063.15	10.4126
91500_55	0.0752349	0.00223391	1.84923	0.0550737	0.17906	0.00192126	0.121335		1075.93	59.5725	1063.15	19.64	1061.84	10.52
SLZB_01	0.0589624	0.000696167	0.725915	0.00893872	0.0892458	0.000556659	0.316257		564.85	25.9225	554.153	5.27228	551.075	3.30785
SLZB_02	0.0579512	0.000635004	0.71709	0.00868918	0.0896068	0.000602538	0.508618		527.815	24.0725	548.947	5.1518	553.211	3.57728
SLZB_03	0.0591626	0.000662097	0.726291	0.00893615	0.0889097	0.000680295	0.558431		572.255	24.0675	554.374	5.26963	549.086	4.03829
SLZB_04	0.0588751	0.000717481	0.72408	0.00946462	0.0891022	0.000603029	0.362568		561.145	-6.48	553.073	5.58678	550.225	3.58168
SLZB_05	0.0590264	0.000723841	0.726359	0.00916441	0.089221	0.000646272	0.361152		568.55	25.92	554.414	5.40335	550.929	3.83643
SLZB_06	0.0585104	0.000731113	0.721716	0.00928071	0.0892933	0.000669556	0.393129		550.035	27.775	551.679	5.48614	551.356	3.97359
SLZB_07	0.059556	0.000668608	0.728397	0.00844807	0.0884768	0.00063178	0.368908		587.065	25.9175	555.612	4.97736	546.522	3.75329
SLZB_08	0.0592721	0.000677614	0.732078	0.00874635	0.0895045	0.000673376	0.411252		575.96	28.695	557.772	5.14131	552.606	3.99541
SLZB_09	0.0590338	0.000694672	0.730204	0.00877791	0.0896745	0.000668151	0.421356		568.55	25.92	556.673	5.16527	553.612	3.96401
SLZB_10	0.058509	0.00063718	0.728495	0.00863273	0.0901164	0.000659705	0.533154		550.035	24.0725	555.67	5.08525	556.226	3.91272
SLZB_11	0.0586549	0.000625607	0.720435	0.00869972	0.0889997	0.00066717	0.544907		553.74	22.22	550.924	5.14813	549.618	3.9605
SLZB_12	0.0582732	0.000637648	0.718599	0.0085359	0.0895627	0.000693226	0.382171		538.925	24.0725	549.839	5.05702	552.95	4.11233
SLZB_13	0.0582565	0.000655379	0.719395	0.00927631	0.0895737	0.000695097	0.660608		538.925	21.295	550.309	5.49086	553.016	4.12334
SLZB_14	0.059732	0.000717452	0.739725	0.00930497	0.0895506	0.000566993	0.436727		594.47	25.92	562.245	5.44425	552.879	3.36792
SLZB_15	0.0580902	0.000768323	0.727703	0.00989348	0.0906491	0.00059527	0.374418		531.52	27.775	555.204	5.82671	559.375	3.53136
SLZB_16	0.0576593	0.000686988	0.719964	0.00964929	0.0904328	0.000656845	0.599557		516.705	21.295	550.646	5.70877	558.096	3.89481
SLZB_17	0.0580178	0.000783637	0.71796	0.0106928	0.0896805	0.000705038	0.519551		531.52	29.6275	549.462	6.3309	553.647	4.18162
SLZB_18	0.0580988	0.000807655	0.720291	0.0104175	0.0896363	0.000624149	0.432996		600.025	31.48	550.839	6.16021	553.386	3.70461
SLZB_19	0.0582565	0.000736023	0.720387	0.0099674	0.0894018	0.000633471	0.523795		538.925	23.145	550.895	5.89474	551.998	3.76033
SLZB_20	0.0583215	0.000681313	0.721294	0.00936997	0.0894754	0.000613656	0.511586		542.63	25.9225	551.43	5.54001	552.434	3.64323
SLZB_21	0.0594584	0.00073197	0.726935	0.00948381	0.0885877	0.000637184	0.470808		583.36	21.29	554.753	5.58892	547.179	3.78484
SLZB_22	0.0577574	0.000695735	0.717431	0.00933239	0.089977	0.000572749	0.469217		520.41	25.9225	549.149	5.53014	555.401	3.40064
SLZB_23	0.05788	0.000628093	0.716888	0.00848223	0.0896861	0.000543886	0.492593		524.11	24.0725	548.828	5.03033	553.68	3.2314
SLZB_24	0.0587435	0.000721408	0.721933	0.00937136	0.0889849	0.000643235	0.467356		566.7	25.92	551.808	5.53879	549.531	3.81927
SLZB_25	0.0595761	0.000720551	0.728985	0.00962226	0.0885298	0.000646044	0.552738		587.065	25.9175	555.957	5.66351	546.836	3.83734
SLZB_26	0.0588314	0.000710005	0.7266	0.00891601	0.0895432	0.000648503	0.331434		561.145	-6.48	554.555	5.25689	552.835	3.84854
SLZB_27	0.0581116	0.000671039	0.721248	0.00836185	0.0898359	0.000618898	0.38193		600.025	28.7	551.403	4.94697	554.567	3.67303
SLZB_28	0.0581089	0.000681725	0.722741	0.00864175	0.0899783	0.000672868	0.440933		600.025	25.9225	552.284	5.10727	555.409	3.9908
SLZB_29	0.0570703	0.000667606	0.712687	0.00887989	0.0904191	0.000625991	0.435358		494.485	21.295	546.341	5.27762	558.015	3.71303
SLZB_30	0.0585737	0.000717492	0.722296	0.00964087	0.0894149	0.000642501	0.452543		550.035	26.695	552.022	5.69618	552.076	3.81355
SLZB_31	0.0589592	0.000698604	0.723151	0.00911679	0.0887767	0.00061012	0.455197		564.85	25.9225	552.525	5.38528	548.298	3.62451
SLZB_32	0.0598848	0.000676843	0.734477	0.00929274	0.0887095	0.000667263	0.584288		598.17	28.695	559.177	5.45335	547.9	3.96203
SLZB_33	0.058893	0.000704201	0.723921	0.00853015	0.0893246	0.000654242	0.289781		564.85	-4.6275	552.979	5.03828	551.541	3.88312
SLZB_34	0.0594635	0.000712755	0.729575	0.0092843	0.0887694	0.000603181	0.47758		583.36	21.29	556.304	5.46365	548.255	3.58358
SLZB_35	0.0590241	0.000695015	0.725758	0.00899322	0.08894	0.000661997	0.511113		568.55	25.92	554.061	5.30473	549.265	3.93016
SLZB_36	0.0581141	0.000686941	0.720247	0.00863288	0.0897907	0.000635245	0.389244		600.025	25.9225	550.813	5.10934	554.299	3.76955
SLZB_37	0.0581074	0.000781094	0.720319	0.00990139	0.0898416	0.000664372	0.378622		600.025	27.775	550.855	5.85609	554.6	3.94115
SLZB_38	0.058024	0.000682977	0.716666	0.00859307	0.0894643	0.000571496	0.355086		531.52	30.5525	548.697	5.09635	552.368	3.3947
SLZB_39	0.0576241	0.000755591	0.713922	0.00964736	0.0897171	0.000551936	0.382043		516.705	27.775	547.072	5.7275	553.864	3.27874
SLZB_40	0.0577051	0.000826654	0.715565	0.0110563	0.0896741	0.000600446	0.502699		520.41	31.4775	548.045	6.55447	553.609	3.56474
SLZB_41	0.0584726	0.000749998	0.721658	0.00937011	0.0893652	0.000577245	0.347239		546.33	27.775	551.645	5.53893	551.782	3.42887
SLZB_42	0.058374	0.000828705	0.723073	0.0109621	0.0895393	0.000617525	0.486502		542.63	26.85	552.479	6.47073	552.812	3.66585
SLZB_43	0.058711	0.000687671	0.729134	0.00899634	0.0899089	0.000584207	0.45863		566.7	25.92	556.045	5.29635	554.999	3.46834
SLZB_44	0.0590844	0.000790125	0.728379	0.0105196	0.0891139	0.000562112	0.541741		568.55	27.77	555.601	6.19156	550.294	3.34036
SLZB_45	0.0584373	0.000758768	0.719009	0.00965827	0.0891108	0.000582994	0.387486		546.33	29.6275	550.082	5.71719	550.276	3.46349
SLZB_46	0.0592367	0.000794506	0.727593	0.0108495	0.08892	0.000641266	0.536465		575.96	29.6225	555.139	6.38789	549.146	3.80786
SLZB_47	0.0589424	0.000689683	0.724716	0.009307	0.0890482	0.000636372	0.559395		564.85	25.9225	553.447	5.49217	549.906	3.77857
SLZB_48	0.0602533	0.000737388	0.733412	0.00941382	0.0882506	0.000648312	0.452029		612.98	25.92	558.554	5.52741	545.182	3.85164
SLZB_49	0.0577896	0.000844121	0.713663	0.0106088	0.0896353	0.000747752	0.282312		520.41	26.85	546.919	6.29694	553.38	4.43387
SLZB_50	0.0599539	0.000772768	0.733651	0.00985332	0.0886754	0.000654542	0.456863		611.13	28.5425	558.694	5.78349	547.699	3.88703
SLZB_51	0.0600386	0.000668828	0.737521	0.00886432	0.0888138	0.000637723	0.601386		605.575	19.44	560.958	5.19421	548.518	3.78729
SLZB_52	0.0592454	0.000740312	0.729807	0.00959374	0.0891514	0.000699551	0.528385		575.96	30.5475	556.44	5.64415	550.517	4.15112
SLZB_53	0.0592932	0.00074662	0.729976	0.00976937	0.0889762	0.000630684	0.556854		588.915	27.77	556.539	5.74646	549.479	3.74524
SLZB_54	0.0591701	0.00072743	0.728302	0.00933806	0.0890467	0.000599922	0.44339		572.255	25.92	555.556	5.49913	549.897	3.56352
SLZB_55	0.0593115	0.000743499	0.726261	0.00910202	0.0886334	0.000602148	0.359422		588.915	27.77	554.356	5.36704	547.45	3.57789
SLZB_56	0.0590713	0.000798931	0.726007	0.00971047	0.088958	0.000614949	0.320837		568.55	29.6225	554.207	5.72493	549.372	3.65244
SLZB_57	0.0575891	0.000680895	0.715058	0.00883901	0.0899789	0.000582411	0.424773		522.26	25.9225	547.745	5.24628	555.413	3.45756
SLZB_58	0.0589439	0.000699225	0.72567	0.00874221	0.0892138	0.000560058	0.362096		564.85	25.9225	554.008	5.15769	550.886	3.32797
SLZB_59	0.0587519	0.000760853	0.726753	0.0100885	0.0895502	0.000662908	0.583915		566.7	29.625	554.645	5.94435	552.876	3.9335
SLZB_60	0.0578978	0.000747231	0.719672	0.0099451	0.0898585	0.000618453	0.534947		524.11	27.775	550.473	5.88402	554.7	3.67034
SLZB_61	0.0586366	0.000738619	0.723947	0.00987551	0.0891546	0.000622388	0.571651		553.74	32.4025	552.995	5.82869	550.535	3.69572
SLZB_62	0.0590958	0.000840027	0.72493	0.0107016	0.0886536	0.000606203	0.461674		572.255	36.1025	553.573	6.31078	547.569	3.60176
SLZB_63	0.0580391	0.00074274	0.721329	0.0100136	0.090019	0.000538546	0.503598		531.52	32.405	551.451	5.91876	555.65	3.19908
SLZB_64	0.0584433	0.000804698	0.720581	0.0107187	0.0893633	0.000600082	0.467707		546.33	29.6275	551.01	6.33665	551.771	3.56352
SLZB_65	0.0580367	0.000829378	0.722276	0.011067	0.0898648	0.000586981	0.454242		531.52	31.4775	552.01	6.53545	554.738	3.48482
	Rediogenic isotopic ratios								Isotopic age (Ma)
Sample/	207Pb	±1s	207Pb	±1s	206Pb	±1s	Rho		207Pb	±1s	207Pb	±1s	206Pb	±1s
spot #	206Pb	abs	235U	abs	238U	abs			206Pb		235U		238U
LA-ICP-MS results (CUG-Profile)
TGZ_01	0.0589803	0.00162013	0.742223	0.019741	0.0919207	0.000871779	0.0673828		564.85	63.8775	563.702	11.5116	566.886	5.15585
TGZ_02	0.058979	0.00134408	0.737895	0.0165965	0.0912066	0.000809595	0.138186		564.85	49.99	561.176	9.70417	562.669	4.79241
TGZ_03	0.0590192	0.00132421	0.736214	0.0164701	0.0908971	0.000778892	0.14201		568.55	49.99	560.194	9.6397	560.84	4.61264
TGZ_04	0.0586061	0.00149117	0.735563	0.019521	0.0911732	0.000840149	0.246074		553.74	55.545	559.813	11.427	562.472	4.9727
TGZ_05	0.0601453	0.0013135	0.748575	0.0164031	0.090734	0.000870811	0.186627		609.28	46.2875	567.397	9.53296	559.877	5.15551
TGZ_06	0.0596275	0.00140344	0.739811	0.0173155	0.0903339	0.000806352	0.216268		590.77	49.99	562.295	10.1128	557.512	4.77692
TGZ_07	0.059938	0.00122538	0.748786	0.0159965	0.0907462	0.000830131	0.32946		611.13	44.435	567.52	9.29592	559.949	4.91546
TGZ_08	0.0605892	0.00155363	0.747862	0.0196828	0.0899494	0.000879317	0.180351		633.35	55.545	566.983	11.4408	555.238	5.20929
TGZ_09	0.059798	0.00129408	0.744765	0.0163198	0.0906816	0.00079146	0.187498		596.01	46.2875	565.182	9.50525	559.567	4.68763
TGZ_10	0.0599923	0.00154933	0.742849	0.0193546	0.0903324	0.000842904	0.124634		611.13	55.545	564.067	11.2825	557.503	4.99262
TGZ_11	0.0602973	0.00148855	0.743434	0.0181254	0.0900918	0.000797181	0.091941		612.98	86.0975	564.407	10.5633	556.08	4.7238
TGZ_12	0.0589494	0.00149533	0.736236	0.0196669	0.0906476	0.000892372	0.308953		564.85	55.545	560.207	11.5079	559.366	5.28312
TGZ_13	0.0594735	0.00154704	0.742908	0.020096	0.090608	0.000774459	0.286649		583.36	55.545	564.101	11.7138	559.132	4.58765
TGZ_14	0.0603766	0.00120745	0.749279	0.0163533	0.0901391	0.000907315	0.403746		616.685	44.435	567.806	9.50025	556.36	5.37371
TGZ_15	0.0591305	0.00146641	0.736899	0.0182771	0.0908643	0.00081523	0.141308		572.255	58.3225	560.595	10.6915	560.647	4.82707
TGZ_16	0.0580707	0.00120431	0.732357	0.0154514	0.0916804	0.000828076	0.259693		531.52	44.44	557.936	9.06444	565.467	4.89934
TGZ_17	0.0594365	0.00142794	0.739764	0.0188242	0.0903015	0.000850875	0.289364		583.36	51.84	562.268	10.9931	557.32	5.0398
TGZ_18	0.059167	0.00134835	0.74288	0.017597	0.0909176	0.000696075	0.322336		572.255	48.14	564.085	10.259	560.962	4.12436
TGZ_19	0.0587478	0.00130799	0.737158	0.0166775	0.0911609	0.000811625	0.303951		566.7	48.1375	560.746	9.75559	562.399	4.80457
TGZ_20	0.0580831	0.00148496	0.730341	0.0188421	0.0913397	0.000765398	0.178646		531.52	55.5475	556.753	11.0632	563.456	4.53134
TGZ_21	0.0588362	0.00154123	0.744205	0.0208349	0.0915367	0.000792713	0.309078		561.145	57.3975	564.856	12.135	564.619	4.69154
TGZ_22	0.0597867	0.00170116	0.745072	0.0198942	0.0910849	0.000860841	0.069385		594.47	62.95	565.361	11.582	561.95	5.09512
TGZ_23	0.059811	0.00143538	0.743801	0.0182723	0.0905708	0.000880942	0.181244		598.17	56.47	564.621	10.6466	558.912	5.21603
TGZ_24	0.0598967	0.00152418	0.744873	0.0194944	0.0904833	0.000868396	0.202015		598.17	55.545	565.245	11.3508	558.395	5.14239
TGZ_25	0.0579862	0.00152142	0.726238	0.0183697	0.0915868	0.000816967	0.0435542		527.815	57.4	554.343	10.8118	564.915	4.83427
TGZ_26	0.0596008	0.00137214	0.73879	0.0176746	0.0901313	0.000893057	0.255271		590.77	49.99	561.699	10.3283	556.313	5.28957
TGZ_27	0.0594488	0.0015848	0.737578	0.0194426	0.0903502	0.000802159	0.134725		583.36	57.3975	560.991	11.368	557.608	4.75211
TGZ_28	0.0581598	0.00138593	0.730332	0.0176274	0.0914147	0.000812136	0.172002		600.025	51.845	556.748	10.351	563.898	4.80652
TGZ_29	0.058539	0.00197188	0.734905	0.0258256	0.0908964	0.000743749	0.189239		550.035	72.21	559.428	15.1196	560.836	4.40544
TGZ_30	0.0580923	0.00309681	0.731648	0.0303893	0.091489	0.00101373	0.0889849		531.52	121.28	557.52	17.8234	564.337	5.99494
TGZ_31	0.0586476	0.00125673	0.733542	0.0161914	0.0907741	0.000812058	0.280613		553.74	52.7675	558.63	9.49134	560.113	4.80874
TGZ_32	0.0591072	0.00138398	0.736773	0.0163625	0.0910333	0.000773251	0.0620505		572.255	49.99	560.521	9.57375	561.645	4.57884
TGZ_33	0.0589913	0.00160931	0.736021	0.0204717	0.0907894	0.000785595	0.168574		568.55	63.8775	560.081	11.9798	560.204	4.65261
TGZ_34	0.059084	0.0015297	0.732906	0.0187991	0.0907184	0.000859187	0.0656835		568.55	55.545	558.257	11.0217	559.785	5.087
TGZ_35	0.059661	0.00134608	0.744461	0.0169967	0.0909316	0.00084253	0.230695		590.77	48.1375	565.006	9.90058	561.044	4.9878
TGZ_36	0.0602367	0.0010423	0.749224	0.013953	0.0903829	0.000755326	0.327121		612.98	37.0275	567.774	8.10857	557.801	4.47568
TGZ_37	0.0585149	0.001207	0.731598	0.0152796	0.091334	0.000929207	0.187237		550.035	46.29	557.491	8.96775	563.422	5.49717
TGZ_38	0.0593774	0.00104596	0.7406	0.0135569	0.0906829	0.000761989	0.317432		588.915	38.88	562.756	7.91769	559.574	4.51381
TGZ_39	0.0599603	0.00119885	0.745754	0.0146509	0.0906253	0.000778693	0.162849		611.13	44.435	565.758	8.53008	559.234	4.61256
TGZ_40	0.059573	0.00140489	0.740259	0.0176656	0.0905332	0.000926033	0.226414		587.065	19.44	562.557	10.3144	558.69	5.48232
TGZ_41	0.0576625	0.0016766	0.735797	0.0217922	0.0918979	0.000911279	0.198532		516.705	69.435	559.95	12.7534	566.752	5.38877
TGZ_42	0.0575497	0.00101148	0.728404	0.0138774	0.091653	0.000769842	0.369742		522.26	38.885	555.616	8.16128	565.306	4.5563
TGZ_43	0.0593828	0.00146932	0.73958	0.0188166	0.0901746	0.000869175	0.258908		588.915	53.6925	562.16	10.9898	556.57	5.14838
TGZ_44	0.0601321	0.00184997	0.744742	0.0224354	0.0900776	0.00100026	0.073684		609.28	66.655	565.169	13.0623	555.996	5.92288
TGZ_45	0.0597426	0.0016733	0.742381	0.0196792	0.0907809	0.000959846	-0.0037095		594.47	61.1	563.794	11.4746	560.154	5.68066
TGZ_46	0.0584607	0.00124808	0.735774	0.0160018	0.0912076	0.000848265	0.265097		546.33	48.14	559.936	9.36837	562.675	5.02041
TGZ_47	0.059171	0.0013903	0.739842	0.0183726	0.0909008	0.00100468	0.279585		572.255	56.47	562.313	10.7292	560.862	5.94464
TGZ_48	0.058499	0.00128428	0.737228	0.017196	0.0914559	0.000879237	0.341988		550.035	48.14	560.786	10.058	564.142	5.20192
TGZ_49	0.0596227	0.00182366	0.743096	0.0247987	0.090514	0.000896248	0.222185		590.77	66.655	564.211	14.4508	558.576	5.30662
TGZ_50	0.0586584	0.00129931	0.734818	0.0174486	0.0909089	0.000914764	0.351413		553.74	52.7675	559.377	10.2197	560.91	5.41401
TGZ_51	0.0598019	0.00131555	0.743591	0.0171105	0.0904546	0.000933146	0.317451		598.17	48.14	564.499	9.97171	558.225	5.52469
TGZ_52	0.0597136	0.00133474	0.74393	0.0166898	0.0908512	0.000895234	0.220652		594.47	49.99	564.696	9.72504	560.569	5.29906
TGZ_53	0.05898	0.00129415	0.735644	0.0178016	0.0907921	0.00115926	0.409791		564.85	48.1375	559.861	10.4212	560.22	6.85774
TGZ_54	0.0602502	0.00141308	0.743547	0.0161008	0.0901577	0.0012072	0.287768		612.98	49.99	564.473	9.38442	556.47	7.14484
TGZ_55	0.0593156	0.0015824	0.741753	0.0204556	0.0904296	0.000901893	0.319179		588.915	57.395	563.428	11.9311	558.077	5.34033
TGZ_56	0.0583243	0.00139245	0.738327	0.0173984	0.0918911	0.000889664	0.22162		542.63	53.695	561.429	10.1699	566.712	5.26139
TGZ_57	0.0582638	0.00144847	0.742359	0.0183069	0.0920865	0.00110391	0.394966		538.925	55.5475	563.781	10.6755	567.865	6.52341
TGZ_58	0.0577233	0.00196318	0.747928	0.018715	0.0919059	0.00109239	0.322437		520.41	74.065	567.021	10.8785	566.799	6.45655
TGZ_59	0.0553954	0.00281964	0.735387	0.018754	0.0911059	0.00114173	0.260187		427.825	114.802	559.71	10.9796	562.074	6.75232
TGZ_60	0.0594333	0.00516174	0.735884	0.0170398	0.0909302	0.00119107	0.328478		583.36	188.865	560.001	9.97448	561.036	7.04469
TGZ_61	0.0527583	0.0039222	0.745436	0.0205964	0.091555	0.00118179	0.196211		316.725	170.347	565.573	11.9878	564.727	6.98597
TGZ_62	0.0562595	0.00520052	0.747681	0.0369563	0.0910865	0.00112882	-0.0245582		461.155	206.3	566.878	21.4747	561.96	6.67627
TGZ_63	0.0581878	0.00176631	0.739095	0.0165986	0.0901473	0.000862454	0.294555		600.025	66.655	561.878	9.69875	556.408	5.10883
TGZ_64	0.0589207	0.00287157	0.747392	0.0388441	0.0904071	0.000987991	0.211616		564.85	139.795	566.71	22.575	557.944	5.8487
TGZ_65	0.0565684	0.00232218	0.734273	0.0202953	0.0918347	0.000894729	0.155488		475.97	87.955	559.058	11.8886	566.379	5.29151
TGZ_66	0.0562244	0.00324147	0.731066	0.0248362	0.0907349	0.00114763	0.1749		461.155	127.762	557.179	14.573	559.882	6.78939
TGZ_67	0.058419	0.00287796	0.744246	0.023071	0.0906856	0.00101522	0.133469		546.33	107.392	564.88	13.4359	559.591	6.00799
TGZ_68	0.0570991	0.00206368	0.732245	0.018816	0.0914198	0.000865574	0.277826		494.485	79.6225	557.87	11.0358	563.929	5.12153
TGZ_69	0.0587226	0.00230886	0.747321	0.0245813	0.091108	0.00083983	0.2187		566.7	80.5425	566.669	14.2896	562.086	4.9711
TGZ_70	0.0581586	0.00230315	0.740515	0.0262021	0.0914092	0.000766861	0.18817		600.025	82.395	562.706	15.2906	563.866	4.53969
TGZ_71	0.0602681	0.0026353	0.748363	0.0310903	0.090048	0.000961239	0.226238		612.98	94.43	567.274	18.0602	555.821	5.69257
TGZ_72	0.0597627	0.00188693	0.73958	0.0225155	0.0899722	0.00083945	0.170356		594.47	68.5075	562.161	13.1477	555.373	4.9738
TGZ_73	0.0576643	0.00150613	0.731106	0.0198049	0.091913	0.000936757	0.353892		516.705	57.4025	557.202	11.6228	566.841	5.53887
TGZ_74	0.059726	0.00145811	0.74204	0.0187342	0.0904256	0.000905	0.275741		594.47	58.3225	563.596	10.9263	558.054	5.35869
TGZ_75	0.0604143	0.00168648	0.746557	0.0206918	0.0900321	0.000827941	0.161224		618.23	55.39	566.225	12.0356	555.727	4.9056
TGZ_76	0.0589685	0.00160017	0.73516	0.0207797	0.0909749	0.00109158	0.214565		564.85	63.8775	559.577	12.1658	561.3	6.45714
TGZ_77	0.0592692	0.00152376	0.736664	0.0192252	0.090638	0.000844978	0.206255		575.96	55.545	560.457	11.2469	559.309	5.00352
TGZ_78	0.0599556	0.00153485	0.748262	0.0189641	0.0912354	0.000842133	0.0727788		611.13	55.545	567.216	11.021	562.839	4.98413
TGZ_79	0.0606358	0.00154166	0.749808	0.0196618	0.089905	0.000865953	0.266619		627.795	53.6925	568.113	11.4159	554.975	5.13058
TGZ_80	0.059563	0.00156428	0.743637	0.0198927	0.090776	0.000861281	0.239841		587.065	55.545	564.526	11.5906	560.125	5.09909
GJ-1_01	0.0584769	0.000871318	0.799525	0.0126742	0.0990956	0.000690437	0.342802		546.33	33.3275	596.561	7.1629	609.107	4.06289
GJ-1_02	0.0594414	0.000933733	0.809517	0.0135612	0.0988243	0.000785172	0.312957		583.36	33.325	602.183	7.62066	607.515	4.61799
GJ-1_03	0.0600898	0.000785104	0.817296	0.0116325	0.0987471	0.000742544	0.395246		605.575	23.1425	606.539	6.51252	607.062	4.36886
GJ-1_04	0.0610821	0.000743183	0.827065	0.0111495	0.0982937	0.000724964	0.453585		642.61	58.3275	611.982	6.21024	604.401	4.26766
GJ-1_05	0.0613208	0.00087749	0.825732	0.0120807	0.0977476	0.000630886	0.238022		650.015	29.625	611.241	6.73156	601.196	3.71901
GJ-1_06	0.0597048	0.000837796	0.806816	0.0125416	0.0979354	0.000795206	0.437592		594.47	36.1025	600.666	7.05985	602.298	4.68029
GJ-1_07	0.0607977	0.00102071	0.81982	0.0135117	0.0979083	0.000638367	0.244081		631.5	69.435	607.948	7.55027	602.139	3.76228
GJ-1_08	0.0607293	0.00106113	0.821209	0.0150897	0.0980556	0.000671671	0.202584		631.5	71.285	608.723	8.42317	603.004	3.95664
GJ-1_09	0.0605155	0.000816831	0.81884	0.0114256	0.0980632	0.00065035	0.289981		620.39	27.7725	607.401	6.39181	603.048	3.83188
GJ-1_10	0.060619	0.000791323	0.816261	0.0112102	0.0975379	0.000674837	0.381277		633.35	27.775	605.96	6.28063	599.964	3.97689
GJ-1_11	0.0605027	0.000791409	0.821164	0.0112037	0.0985413	0.00066815	0.303919		620.39	27.7725	608.698	6.26027	605.855	3.93443
GJ-1_12	0.0589752	0.000905182	0.80372	0.0128572	0.0990046	0.000625558	0.196392		564.85	33.325	598.925	7.24928	608.573	3.68401
GJ-1_13	0.0606844	0.000801368	0.819953	0.0119004	0.0977314	0.000801825	0.520187		627.795	29.625	608.022	6.65229	601.1	4.71988
GJ-1_14	0.0591143	0.00126992	0.811137	0.0172237	0.099167	0.000989254	0.180568		572.255	46.2875	603.092	9.66489	609.525	5.81112
GJ-1_15	0.0602496	0.000797381	0.814832	0.0116394	0.0982134	0.000733103	0.355436		612.98	29.625	605.161	6.52514	603.93	4.31559
GJ-1_16	0.0600773	0.0008832	0.813554	0.012876	0.0987374	0.00130395	0.226824		605.575	31.4725	604.446	7.22077	607.005	7.65741
GJ-1_17	0.0608514	0.00146341	0.821551	0.0182981	0.098092	0.000644472	0.0920592		635.2	47.9875	608.913	10.2082	603.218	3.79741
GJ-1_18	0.0602543	0.000778448	0.819089	0.011303	0.0985828	0.000649006	0.308057		612.98	27.7725	607.54	6.32266	606.098	3.82236
GJ-1_19	0.0600805	0.000796379	0.811983	0.0116124	0.0980405	0.000679317	0.382614		605.575	29.62	603.566	6.52021	602.915	4.00143
GJ-1_20	0.0587468	0.0011854	0.807782	0.0164734	0.0995557	0.000739188	0.255497		566.7	44.435	601.209	9.26172	611.805	4.34625
GJ-1_21	0.0546653	0.00296234	0.799968	0.0122491	0.100182	0.000682893	0.216312		398.2	122.21	596.81	6.92176	615.474	4.01513
GJ-1_22	0.0574914	0.00255902	0.814631	0.0130023	0.0983452	0.00079003	0.403326		509.3	98.1325	605.049	7.28711	604.704	4.64833
GJ-1_23	0.0600196	0.00084774	0.81436	0.0122089	0.0986133	0.00100561	0.359079		605.575	31.4725	604.897	6.84491	606.277	5.90976
GJ-1_24	0.0599208	0.000847531	0.811844	0.0120448	0.0983377	0.000738385	0.364502		611.13	31.475	603.488	6.76255	604.66	4.34605
91500_01	0.0750423	0.00145721	1.85981	0.0382982	0.179436	0.00148755	0.364962		1069.45	38.8875	1066.92	13.6172	1063.89	8.15075
91500_02	0.0746644	0.00125167	1.84799	0.032309	0.179444	0.00133698	0.309007		1061.12	34.4175	1062.72	11.5416	1063.93	7.33
91500_03	0.0756901	0.00122525	1.86654	0.0311814	0.1792	0.00135493	0.258878		1087.04	33.33	1069.31	11.0689	1062.6	7.42927
91500_04	0.0763213	0.00126957	1.865	0.0330781	0.177457	0.00139557	0.326597		1103.39	33.0275	1068.76	11.7457	1053.07	7.66168
91500_05	0.0766821	0.00120389	1.88962	0.0303597	0.179333	0.00146187	0.240839		1122.22	31.485	1077.45	10.6932	1063.33	8.01143
91500_06	0.0767937	0.00123485	1.88363	0.0302516	0.178517	0.00136359	0.183808		1116.66	32.2525	1075.34	10.6773	1058.87	7.48063
91500_07	0.0740066	0.00140923	1.82824	0.0351082	0.180018	0.00165191	0.198535		1042.6	34.26	1055.65	12.6248	1067.07	9.04275
91500_08	0.0756592	0.00122576	1.86442	0.0312391	0.178957	0.00144547	0.261969		1087.04	32.25	1068.55	11.0975	1061.28	7.92441
91500_09	0.0765164	0.0013031	1.89041	0.0322213	0.179285	0.0013503	0.187226		1109.26	33.335	1077.73	11.3428	1063.07	7.40353
91500_10	0.075744	0.00113285	1.86051	0.0286284	0.178618	0.00148161	0.283304		1088.58	30.4	1067.17	10.188	1059.42	8.12378
91500_11	0.0749494	0.0011228	1.85439	0.0281485	0.179509	0.00142385	0.246036		1133.34	30.71	1064.99	10.0394	1064.29	7.80303
91500_12	0.0746069	0.00113152	1.84652	0.0289959	0.179616	0.00137331	0.267709		1057.41	30.095	1062.19	10.3683	1064.87	7.52691
91500_13	0.0737369	0.0012119	1.83806	0.0306869	0.180804	0.0014778	0.223156		1035.19	61.1125	1059.17	11.0026	1071.36	8.08854
91500_14	0.075918	0.00136073	1.8804	0.034598	0.179636	0.0015083	0.237307		1094.44	35.1875	1074.21	12.2181	1064.98	8.2625
91500_15	0.0657812	0.00614053	1.79339	0.0288532	0.181385	0.00134784	0.211696		798.15	196.283	1043.06	10.5119	1074.54	7.37753
91500_16	0.0681519	0.00489113	1.8268	0.0288253	0.180973	0.00132983	0.232752		872.215	149.995	1055.13	10.3788	1072.29	7.282
91500_17	0.0733313	0.00135646	1.8138	0.0323838	0.179828	0.00139211	0.0901236		1033.34	37.0375	1050.45	11.7078	1066.03	7.62803
91500_18	0.0745772	0.00130277	1.85492	0.0331675	0.180347	0.00130879	0.274125		1057.41	35.185	1065.18	11.8186	1068.87	7.17115
SLZB_01	0.0572395	0.000606857	0.712806	0.0086345	0.0903105	0.000674669	0.576621		501.89	24.07	546.411	5.13216	557.373	4.00029
SLZB_02	0.0589546	0.00066056	0.727766	0.00934221	0.08948	0.000668481	0.624887		564.85	24.07	555.241	5.50325	552.461	3.96661
SLZB_03	0.057919	0.000620169	0.715439	0.00967846	0.0895412	0.00074943	0.731949		527.815	24.0725	547.971	5.74087	552.823	4.44414
SLZB_04	0.0590062	0.000618183	0.725814	0.00931883	0.0891804	0.000737865	0.75903		568.55	24.07	554.093	5.49567	550.688	4.37724
SLZB_05	0.0581271	0.0010078	0.721526	0.012935	0.0899127	0.000650639	0.652386		600.025	38.885	551.567	7.63846	555.021	3.85993
SLZB_06	0.0594224	0.000646182	0.73363	0.00926549	0.0894235	0.000669575	0.672989		583.36	19.4375	558.681	5.44006	552.127	3.97326
SLZB_07	0.058165	0.000664692	0.718888	0.00959966	0.0895997	0.000692119	0.67436		600.025	25.9225	550.01	5.68304	553.169	4.10568
SLZB_08	0.0584069	0.000643614	0.723956	0.00876757	0.0897368	0.000639491	0.630447		546.33	24.07	553	5.17764	553.98	3.79476
SLZB_09	0.0584083	0.000663697	0.718692	0.00921416	0.0892062	0.000682776	0.635198		546.33	24.07	549.895	5.45644	550.841	4.05191
SLZB_10	0.058976	0.00057703	0.727922	0.00954524	0.0893739	0.000709032	0.745707		564.85	20.3675	555.333	5.62179	551.833	4.20629
SLZB_11	0.0594406	0.000609182	0.725321	0.00888376	0.0883814	0.000653658	0.658982		583.36	22.215	553.803	5.2418	545.957	3.88278
SLZB_12	0.0594079	0.000797356	0.726817	0.0109139	0.0886184	0.000657124	0.460704		583.36	27.77	554.683	6.42856	547.361	3.90247
SLZB_13	0.0585144	0.000920887	0.728957	0.0106542	0.0896785	0.000845996	0.708704		550.035	30.55	555.941	6.26844	553.636	5.01374
SLZB_14	0.0549948	0.00372015	0.723685	0.0103659	0.0889661	0.000915653	0.806204		413.01	156.465	552.84	6.11789	549.419	5.42856
SLZB_15	0.0579144	0.000886115	0.725698	0.0101755	0.0896528	0.000846111	0.773473		527.815	30.5525	554.025	5.99897	553.483	5.01453
SLZB_16	0.0532794	0.00524866	0.725317	0.00933022	0.0903385	0.000748145	0.663952		338.945	224.047	553.801	5.50392	557.539	4.4335
SLZB_17	0.0577444	0.000687758	0.718646	0.00989348	0.0902073	0.000760577	0.772484		520.41	25.9225	549.867	5.85705	556.763	4.50735
SLZB_18	0.0577018	0.00061504	0.717385	0.0091504	0.0902458	0.000693599	0.653091		516.705	24.0725	549.122	5.42294	556.99	4.11213
SLZB_19	0.0578036	0.00080289	0.717111	0.0107135	0.0897967	0.000712375	0.71034		524.11	26.85	548.96	6.3462	554.335	4.22449
	Rediogenic isotopic ratios								Isotopic age (Ma)
Sample/	207Pb	±1s	207Pb	±1s	206Pb	±1s	Rho		207Pb	±1s	207Pb	±1s	206Pb	±1s
spot #	206Pb	abs	235U	abs	238U	abs			206Pb		235U		238U
LA-ICP-MS results (WHCGS)
TGZ_01	0.0579194	0.00209342	0.721292	0.0243255	0.0905553	0.000959159	0.100895		439.42	82.6382	547.338	14.7971	558.581	5.6625
TGZ_02	0.0604295	0.00210433	0.767354	0.0248651	0.0923893	0.00104212	0.156197		509.326	86.7602	571.381	14.497	569.362	6.14417
TGZ_03	0.0588656	0.00213971	0.739192	0.0241573	0.0917379	0.00118234	0.0298668		442.94	82.8283	555.296	14.0744	565.414	6.96674
TGZ_04	0.0601107	0.00211342	0.747146	0.0233044	0.0906369	0.00115713	-0.021062		497.442	83.9149	560.919	13.5036	558.927	6.83128
TGZ_05	0.0632231	0.0022364	0.785195	0.0252751	0.0906858	0.00108569	0.10657		623.618	80.7134	584.576	14.9329	559.268	6.41088
TGZ_06	0.0595018	0.00203281	0.756559	0.0244295	0.0920451	0.000965993	0.233767		505.488	78.616	568.139	14.5587	567.38	5.69602
TGZ_07	0.0603313	0.00215487	0.742387	0.0240671	0.0897924	0.0010936	0.0952475		490.894	81.7274	557.393	13.8683	553.978	6.46418
TGZ_08	0.0562704	0.00217003	0.709535	0.0255745	0.0916471	0.00118	0.0841008		317.368	93.3662	535.855	14.9751	564.879	6.96116
TGZ_09	0.0621104	0.00220288	0.759049	0.0241545	0.089529	0.000984808	-0.0322341		564.322	83.5582	567.193	14.0142	552.493	5.82709
TGZ_10	0.0602067	0.00197618	0.760435	0.0226645	0.0918077	0.00114934	0.13265		556.488	76.6438	571.727	13.6117	565.851	6.78715
TGZ_11	0.0596097	0.00214451	0.744176	0.0237779	0.092338	0.000992924	0.0869159		476.213	80.4813	561.471	14.3002	569.092	5.85745
TGZ_12	0.0591444	0.00204895	0.739673	0.0240535	0.0908731	0.00118055	0.149677		512.759	78.764	556.192	14.071	560.337	6.97328
TGZ_13	0.0634853	0.0023766	0.792578	0.0262342	0.0906062	0.00105543	-0.0428729		620.803	79.932	585.165	14.7773	560.523	6.48001
TGZ_14	0.0586859	0.00209554	0.742226	0.0245018	0.0921844	0.00116412	0.22895		480.957	75.2591	556.619	14.5238	568.065	6.85847
TGZ_15	0.0594466	0.00208289	0.74494	0.0227793	0.0919594	0.00108655	-0.0377318		484.89	77.3938	560.062	13.2443	566.794	6.40641
TGZ_16	0.0595168	0.00204838	0.737494	0.0229583	0.0905359	0.00113938	0.0543545		516.765	77.1393	555.448	13.3248	558.343	6.72293
TGZ_17	0.0587456	0.00196926	0.746272	0.023152	0.0914336	0.00101497	0.101309		502.075	74.7753	560.584	13.3347	565.263	6.2102
TGZ_18	0.0620838	0.00220417	0.767415	0.0238213	0.0911338	0.00114069	-0.0130048		577.954	76.4828	572.518	13.7267	561.876	6.73886
TGZ_19	0.060848	0.00209619	0.753562	0.0239949	0.0910747	0.00108794	0.215324		544.722	74.5474	566.874	14.1421	561.566	6.42502
TGZ_20	0.0592618	0.0021683	0.736701	0.0243141	0.0917197	0.00107373	0.125851		441.039	82.8705	556.658	14.5873	565.386	6.34435
TGZ_21	0.0592399	0.00211047	0.737728	0.0237511	0.0912561	0.000997667	-0.00550806		457.259	85.4753	554.731	13.9712	562.699	5.88747
TGZ_22	0.0578707	0.00191996	0.719188	0.0216718	0.0907558	0.000951131	0.0967581		458.481	72.9775	545.44	12.8374	559.771	5.62186
TGZ_23	0.0588052	0.00193744	0.729599	0.0213273	0.0901805	0.0010103	0.0896553		501.146	73.6905	554.547	12.1957	556.332	5.96999
TGZ_24	0.0585127	0.00193389	0.727302	0.02163	0.0914968	0.00102621	0.111038		469.659	77.2633	550.398	12.7861	564.102	6.05764
TGZ_25	0.05792	0.00195338	0.715964	0.0226994	0.0900263	0.00102137	0.227352		436.227	81.9475	545.522	13.0578	555.413	6.02856
TGZ_26	0.0602418	0.0019892	0.753397	0.0227038	0.0912493	0.00102171	0.174485		535.703	73.0405	565.162	13.2229	562.643	6.03036
TGZ_27	0.0608535	0.00205891	0.760003	0.0236046	0.090967	0.000900391	0.112162		543.896	77.8802	568.269	13.7195	561.051	5.3149
TGZ_28	0.0581545	0.00203822	0.725074	0.0228215	0.0919656	0.0011482	0.112239		415.508	81.7884	550.757	13.7688	566.785	6.76438
TGZ_29	0.057087	0.00186437	0.720557	0.0214625	0.0918138	0.00103353	0.143609		429.975	78.3884	548.672	13.2049	565.97	6.09196
TGZ_30	0.0586524	0.00191483	0.735889	0.0224252	0.0904811	0.00095652	0.191734		489.204	74.9045	554.924	13.1064	558.144	5.65015
TGZ_31	0.0588009	0.00191094	0.743855	0.0230505	0.0908963	0.000956915	0.223603		475.144	82.3971	559.133	13.4565	560.599	5.64509
TGZ_32	0.0589842	0.0020597	0.739392	0.0223631	0.0918696	0.00102215	-0.111276		477.846	80.4808	556.971	13.2949	566.308	6.02925
TGZ_33	0.0561329	0.00183431	0.727506	0.0225557	0.0927414	0.00090992	0.183175		381.343	78.5392	549.759	13.1745	571.525	5.36163
TGZ_34	0.055792	0.00180858	0.700271	0.0199331	0.0918775	0.000998245	0.147483		359.8	73.962	535.36	11.9629	566.369	5.89637
TGZ_35	0.0614108	0.00211573	0.759896	0.0232562	0.0901237	0.000989081	0.0108608		548.144	77.2045	568.617	13.3514	556.009	5.85111
TGZ_36	0.0593065	0.00191936	0.743176	0.0222998	0.0902655	0.000979159	0.155705		508.19	73.2245	559.546	12.7526	556.855	5.78569
TGZ_37	0.0592514	0.00181714	0.753287	0.0208916	0.0920432	0.000938639	0.161804		526.617	66.8643	566.729	12.0505	567.386	5.54182
TGZ_38	0.059366	0.00221549	0.737328	0.0244836	0.0905443	0.00105399	-0.0242263		466.178	84.3143	553.726	14.4669	558.454	6.22331
TGZ_39	0.0604898	0.00221601	0.747123	0.024404	0.0899442	0.00104091	-0.0191343		505.563	80.2298	559.886	14.0953	554.913	6.15418
TGZ_40	0.0572996	0.00181874	0.732984	0.0213451	0.0927106	0.000898724	0.226822		445.887	67.9675	558.893	12.4434	571.349	5.30269
TANZ_01	0.0598503	0.00172627	0.759702	0.0197961	0.0917421	0.000737946	0.138469		564.686	64.2889	571.402	11.4728	565.718	4.3548
TANZ_02	0.0595868	0.00171699	0.755805	0.0193015	0.0922136	0.00082028	0.16371		548.284	62.8893	571.137	11.4521	568.46	4.83695
TANZ_03	0.0594035	0.00168217	0.751185	0.0188352	0.0922018	0.000725014	0.0887146		546.003	62.7057	567.088	10.9261	568.438	4.27774
TANZ_04	0.0602997	0.00174915	0.755718	0.0195834	0.0912274	0.000767819	0.0669239		579.552	64.2278	569.193	11.4044	562.662	4.5387
TANZ_05	0.0577495	0.00162049	0.734467	0.0181111	0.0914839	0.000752559	0.0775166		486.493	62.6956	557.631	10.5622	564.185	4.44632
TANZ_06	0.0576609	0.00164758	0.74509	0.0191344	0.0927387	0.000760548	0.16126		477.108	64.7121	563.22	11.1369	571.59	4.47851
	Rediogenic isotopic ratios								Isotopic age (Ma)
Sample/	207Pb	±1s	207Pb	±1s	206Pb	±1s	Rho		207Pb	±1s	207Pb	±1s	206Pb	±1s
spot #	206Pb	abs	235U	abs	238U	abs			206Pb		235U		238U
LA-ICP-MS results (SDIGS)
TGZ_01	0.0588034	0.00105467	0.739279	0.0150145	0.0909276	0.000905075	0.273769		609.28	41.6575	569.684	8.07258	560.199	5.19302
TGZ_02	0.0581542	0.00101234	0.724544	0.0138094	0.0902395	0.000838469	0.454122		501.89	37.0325	552.19	8.08594	562.703	5.03123
TGZ_03	0.0580943	0.00101707	0.723594	0.0134981	0.0902697	0.000856224	0.182443		475.97	53.6975	537.901	9.87896	553.738	5.18673
TGZ_04	0.0580026	0.00107751	0.730252	0.0150918	0.0911126	0.000931547	0.201121		566.7	49.99	560.786	9.94004	562.518	5.45008
TGZ_05	0.0599549	0.00103507	0.744325	0.0137887	0.0900321	0.00090959	0.23691		575.96	53.695	563.062	11.0776	559.856	5.84836
TGZ_06	0.0592892	0.00104448	0.741963	0.0146059	0.0905426	0.000905859	0.35387		1039.82	35.1875	1060.69	12.2705	1070.04	10.0854
TGZ_07	0.0585965	0.00112198	0.741846	0.0143025	0.0909217	0.000892726	0.379567		1100	35.955	1066.31	12.3699	1054.82	10.1662
TGZ_08	0.0601486	0.00105281	0.752518	0.013917	0.0907886	0.000877211	0.290328		475.97	91.655	536.987	11.2276	552.329	5.86471
TGZ_09	0.0572485	0.000956085	0.722581	0.0137029	0.0912123	0.000850103	0.185167		561.145	55.545	560.178	10.4227	562.313	5.71726
TGZ_10	0.0565807	0.0013405	0.698511	0.016514	0.0896959	0.000875302	0.267478		553.74	50.915	552.376	9.55189	551.093	5.25042
TGZ_11	0.057761	0.00109662	0.720748	0.0138039	0.0906064	0.00085353	0.275236		612.98	49.99	570.254	10.8479	559.355	5.30846
TGZ_12	0.0587422	0.00133351	0.737227	0.016994	0.091181	0.000921097	0.31436		542.63	56.3175	558.885	11.4508	563.169	5.54604
TGZ_13	0.0592778	0.00145536	0.741126	0.018984	0.0907305	0.000988217	0.217495		590.77	27.7725	564.083	11.0847	559.457	5.73651
TGZ_14	0.0566067	0.0015064	0.696983	0.0187545	0.0894577	0.000989866	0.275622		611.13	51.8425	565.286	10.3803	555.985	5.45423
TGZ_15	0.058884	0.00149746	0.736187	0.0178097	0.0911462	0.000966361	0.2471		487.08	53.6975	544.88	10.6382	559.716	5.84874
TGZ_16	0.0586869	0.00125101	0.722897	0.0161951	0.0892487	0.000885736	0.28483		1072.22	33.33	1065.82	11.5005	1062.99	9.22867
TGZ_17	0.0602381	0.00141189	0.753502	0.0187217	0.0906458	0.000896665	0.434187		1061.12	36.1125	1061.18	11.1743	1061.89	9.24927
TGZ_18	0.0582942	0.00150411	0.733977	0.0195438	0.0912913	0.000937458	0.086986		616.685	70.36	561.182	13.8954	550.739	6.08467
TGZ_19	0.0596659	0.00150768	0.742876	0.0190152	0.0906629	0.000969208	0.0745619		538.925	96.2825	551.759	17.4473	558.027	7.90022
TGZ_20	0.059999	0.00141365	0.744943	0.0178265	0.0900757	0.000920901	0.327769		590.77	70.3575	556.47	15.0002	545.779	6.50363
TGZ_21	0.0568617	0.00138075	0.710225	0.0179071	0.0907068	0.000988261	0.154122		527.815	80.5425	559.214	12.5495	557.49	5.84431
TGZ_22	0.0592923	0.00109811	0.737816	0.0134249	0.0905808	0.000930797	0.00897916		494.485	92.58	546.859	13.8813	548.479	7.30046
TGZ_23	0.0604095	0.00197448	0.737904	0.023774	0.0891891	0.00102684	0.360356		409.31	67.585	534.705	14.3498	563.543	6.85167
TGZ_24	0.0582434	0.00255253	0.721851	0.0295796	0.0904211	0.00133536	0.235906		477.82	82.4	561.608	13.9728	559.503	6.66485
TGZ_25	0.0595968	0.00190244	0.729859	0.025547	0.0883513	0.00109688	0.500299		1083.34	32.405	1065.53	13.2099	1057.6	10.238
TGZ_26	0.0579605	0.00201705	0.734539	0.021428	0.0903302	0.00098718	0.609967		1055.56	31.4825	1061.47	12.1333	1067.28	9.38658
TGZ_27	0.0570469	0.00235878	0.713562	0.0234177	0.0888072	0.00123204	0.163351		538.925	79.6175	554.536	15.8083	559.932	6.11626
TGZ_28	0.0549073	0.00175555	0.693172	0.0239209	0.0913545	0.00115882	0.135556		550.035	83.32	558.321	16.6051	563.847	7.50832
TGZ_29	0.056415	0.00219539	0.738634	0.0239166	0.0906709	0.00112647	0.154906		331.54	123.135	559.471	15.4433	558.623	7.19969
TGZ_30	0.0582594	0.00215072	0.726567	0.026873	0.0907434	0.00103362	0.241829		542.63	63.8775	557.407	11.9627	561.504	5.42684
TGZ_31	0.0585455	0.00225194	0.733014	0.0283335	0.091406	0.00127015	0.360618		442.64	68.5125	561.232	9.55679	560.952	5.62397
TGZ_32	0.0591099	0.00114177	0.738122	0.0147656	0.0905925	0.000897064	0.429266		479.67	62.9575	560.481	9.8069	556.873	5.67624
TGZ_33	0.0530933	0.0027469	0.734978	0.0263799	0.0905219	0.00121688	0.262059		542.63	51.845	558.548	11.1974	563.377	6.19956
TGZ_34	0.0583724	0.00156983	0.731455	0.0203888	0.0910094	0.000917019	0.564362		1057.41	39.045	1062.87	12.8287	1064.58	9.70495
TGZ_35	0.0557863	0.00172254	0.73799	0.0163449	0.0909159	0.000950353	0.3175		1075.93	35.1825	1064.13	12.4396	1060.3	9.34033
TGZ_36	0.056726	0.00165749	0.736705	0.016761	0.090226	0.000958624	0.298664		546.33	55.545	559.346	11.585	563.285	6.04287
TGZ_37	0.0583068	0.00138522	0.733403	0.0191045	0.0913265	0.00104827	0.217355		431.53	67.585	557.226	9.15839	557.119	5.68394
TGZ_38	0.058425	0.00148724	0.734765	0.019782	0.0913108	0.0010217	0.265193		550.035	58.3225	559.223	10.5779	563.262	5.36137
TGZ_39	0.055478	0.00175132	0.731147	0.0156009	0.0902675	0.000959964	0.106892		527.815	52.77	553.948	10.5745	564.297	5.92823
TGZ_40	0.0585289	0.00144778	0.734554	0.0180584	0.0913069	0.000906159	0.357013		598.17	37.7975	561.586	8.51443	552.611	5.08727
TGZ_41	0.0579271	0.00148252	0.725567	0.0179592	0.0914822	0.00100242	0.433336		600.025	40.7375	558.097	8.98953	562.612	5.31555
TGZ_42	0.0579891	0.0010504	0.729125	0.0151581	0.0908414	0.000944837	0.477477		590.77	38.88	564.536	8.33229	559.101	5.96631
TGZ_43	0.0598625	0.00107227	0.738597	0.0145642	0.0895054	0.000858316	0.355174		500.04	37.96	548.083	8.62024	562.785	5.4568
TGZ_44	0.0581535	0.00108875	0.732632	0.0153259	0.0911969	0.000898303	0.425063		1050.01	34.725	1055.96	12.5789	1058.76	9.66394
TGZ_45	0.0596151	0.00103497	0.743654	0.0142933	0.0906027	0.00100809	0.307438		1081.17	30.5525	1070.99	12.6925	1066.12	9.05708
TGZ_46	0.0569429	0.00108479	0.715628	0.0145515	0.0912262	0.000922274	0.385124		553.74	44.435	560.398	9.83169	561.533	5.59729
TGZ_47	0.058642	0.00120084	0.736563	0.0168021	0.0910144	0.000945914	0.339231		620.39	36.105	570.312	8.55222	559.197	5.78257
TGZ_48	0.0605124	0.00112195	0.753602	0.0147548	0.090619	0.000976973	0.367961		566.7	38.8825	556.881	8.15912	557.301	5.09347
TGZ_49	0.0587248	0.0010701	0.730558	0.0138909	0.0902983	0.000859967	0.339206		550.035	54.62	562.53	10.1742	565.432	5.30182
TGZ_50	0.0585869	0.00132894	0.740213	0.0174248	0.0916743	0.000896351	0.374852		455.6	40.7375	539.833	8.50249	561.422	5.33211
TGZ_51	0.0558437	0.000996244	0.701745	0.0142366	0.0909954	0.000900951	0.749406		538.925	22.22	556.383	5.77912	559.578	4.62244
TGZ_52	0.0590928	0.00104422	0.740841	0.0143642	0.0906128	0.000878369	0.702178		542.63	22.22	557.591	5.50769	560.248	4.65202
TGZ_53	0.0583002	0.00105723	0.732855	0.0141164	0.0909706	0.000861497	0.68395		531.52	24.0725	560.103	5.88318	567.013	5.23146
TGZ_54	0.0588802	0.000947946	0.739982	0.0137853	0.0907865	0.00090726	0.242421		1043.53	35.185	1054.6	11.8265	1061.37	9.42334
TGZ_55	0.0561197	0.00110043	0.70445	0.0138467	0.0911155	0.000821089	0.424074		1087.04	35.9525	1072.32	13.2114	1063.5	9.19775
SLZA_01	0.0583111	0.00071446	0.734101	0.0112543	0.0911523	0.000907495	0.370293		531.52	40.735	556.701	8.86457	562.114	5.51205
SLZA_02	0.0583732	0.000629262	0.731954	0.0100977	0.0907828	0.000869488	0.401206		611.13	37.0275	564.926	8.03566	555.727	5.38765
SLZA_03	0.0584665	0.00062429	0.733062	0.00972838	0.0907594	0.000804177	0.402502		1029.32	33.645	1053.32	11.7484	1064.6	9.90948
SLZA_04	0.0582412	0.000622236	0.72971	0.00982364	0.0906834	0.000780408	0.315905		1101.85	39.815	1073.58	12.033	1060.28	9.24088
SLZA_05	0.0583583	0.000606801	0.731769	0.00937126	0.0907968	0.000785501	0.436941		575.96	38.88	563.551	8.52236	558.745	5.36321
SLZA_06	0.058024	0.000663399	0.736059	0.0100377	0.0919421	0.000884626	0.422112		553.74	42.585	563.482	8.34621	560.986	5.28394

## Sheet: Table S6
Table S6. Hf isotopic results of TGZ zircon.
solution-MC-ICP-MS
Analytical spots	176Hf/177Hf	SE
TGZ_01	0.281921	4.63238e-06
TGZ_02	0.281918	4.79167e-06
TGZ_03	0.281918	4.29711e-06
TGZ_04	0.281915	4.60616e-06
TGZ_05	0.281914	4.4532e-06
TGZ_06	0.281921	5.11558e-06
TGZ_07	0.281913	5.24276e-06
TGZ_08	0.281918	4.39922e-06
TGZ_09	0.281915	5.08643e-06
TGZ_10	0.281913	4.63884e-06
TGZ_11	0.281911	4.77731e-06
TGZ_12	0.281916	5.43657e-06
TGZ_13	0.281912	4.88011e-06
TGZ_14	0.281911	3.6961e-06
TGZ_15	0.281914	5.16335e-06
TGZ_16	0.28191	4.18869e-06
TGZ_17	0.281914	3.84153e-06
TGZ_18	0.28191	3.95507e-06
BCR-2	0.282855	8.43707e-06
RGM-2	0.283009	7.26363e-06
Continued-Table S6. Hf isotopic results of TGZ zircon.
LA-MC-ICP-MS CUG-Session 1
	176Hf/177Hf	2σ	176Lu/177Hf	2σ	176Yb/177Hf	2σ
TGZ_01	0.281934	2.50478e-05	5.32533e-05	3.83552e-07	0.00216535	1.74299e-05
TGZ_02	0.281919	2.48471e-05	5.60534e-05	1.61736e-07	0.00228146	7.55343e-06
TGZ_03	0.281915	2.63487e-05	5.51534e-05	1.48617e-07	0.0022408	5.81108e-06
TGZ_04	0.281917	2.65612e-05	5.53907e-05	1.66238e-07	0.00227377	6.91022e-06
TGZ_05	0.281896	2.78212e-05	5.43779e-05	1.41987e-07	0.0022332	8.6276e-06
TGZ_06	0.281911	2.63345e-05	5.46774e-05	1.37796e-07	0.00222414	9.47184e-06
TGZ_07	0.281888	3.06412e-05	5.18357e-05	2.57513e-07	0.0021762	9.44989e-06
TGZ_08	0.281888	3.17634e-05	5.55285e-05	2.56873e-07	0.0023316	1.39222e-05
TGZ_09	0.281923	3.26106e-05	5.40133e-05	2.62114e-07	0.00228295	1.3812e-05
TGZ_10	0.281913	3.27282e-05	5.50359e-05	3.46769e-07	0.00228678	1.63266e-05
TGZ_11	0.281935	3.26639e-05	5.83336e-05	1.63022e-07	0.00251809	8.97347e-06
TGZ_12	0.281925	2.01644e-05	6.53214e-05	1.94785e-07	0.00274362	9.64143e-06
TGZ_13	0.281936	2.04289e-05	5.10195e-05	2.91732e-07	0.00215228	1.11206e-05
TGZ_14	0.281931	1.99494e-05	5.18095e-05	1.91578e-07	0.00217925	9.17576e-06
TGZ_15	0.281944	1.64676e-05	4.91664e-05	1.87929e-07	0.00202257	9.81752e-06
TGZ_16	0.281927	1.75161e-05	4.77904e-05	2.01271e-07	0.00200202	8.33828e-06
TGZ_17	0.281917	2.59771e-05	5.1369e-05	2.36002e-07	0.00214743	1.07694e-05
TGZ_18	0.281929	2.60016e-05	5.2783e-05	1.62627e-07	0.00221747	8.41189e-06
TGZ_19	0.281921	2.71382e-05	5.02661e-05	3.0926e-07	0.00217564	1.26323e-05
TGZ_20	0.281906	2.51937e-05	5.29118e-05	5.30055e-07	0.00220177	1.88914e-05
TGZ_21	0.281916	2.4411e-05	4.19706e-05	4.87953e-07	0.00177545	2.22239e-05
TGZ_22	0.281895	2.69145e-05	5.0069e-05	5.14914e-07	0.0021286	2.71518e-05
TGZ_23	0.281951	3.08518e-05	5.34926e-05	4.69772e-07	0.00216834	1.97493e-05
TGZ_24	0.281949	3.19888e-05	5.56379e-05	4.86781e-07	0.00227416	2.02718e-05
TGZ_25	0.281902	2.5998e-05	3.15109e-05	2.84482e-07	0.00136393	9.69875e-06
TGZ_26	0.281909	2.51323e-05	2.57038e-05	2.08226e-07	0.00111206	7.34434e-06
TGZ_27	0.281916	2.56782e-05	3.04726e-05	1.30818e-06	0.00130141	4.76852e-05
TGZ_28	0.281954	2.73147e-05	5.35821e-05	2.41792e-07	0.00218509	9.86702e-06
TGZ_29	0.281956	2.33908e-05	5.41915e-05	1.36098e-06	0.0022396	5.56214e-05
TGZ_30	0.281915	2.17949e-05	4.62657e-05	1.9396e-07	0.00187879	1.14634e-05
TGZ_31	0.281921	1.90326e-05	4.70115e-05	2.25566e-07	0.00196173	7.31656e-06
TGZ_32	0.281925	2.14982e-05	4.75199e-05	1.59771e-07	0.00197309	1.37214e-05
TGZ_33	0.281906	2.17299e-05	4.57084e-05	2.51586e-07	0.00189873	1.43501e-05
TGZ_34	0.281899	2.78514e-05	4.32467e-05	2.37785e-07	0.00177184	1.1202e-05
TGZ_35	0.281909	2.71349e-05	4.21311e-05	1.74272e-07	0.00169733	6.03579e-06
TGZ_36	0.281898	2.68646e-05	4.2467e-05	1.87677e-07	0.00172175	5.96971e-06
TGZ_37	0.28189	2.71624e-05	3.9636e-05	1.79143e-07	0.00160943	5.995e-06
TGZ_38	0.281915	2.83353e-05	4.00374e-05	2.11799e-07	0.00163443	7.42453e-06
TGZ_39	0.28192	2.51856e-05	4.28717e-05	2.34581e-07	0.00176753	1.27176e-05
TGZ_40	0.281923	2.48236e-05	3.9844e-05	4.7607e-07	0.00161543	1.43556e-05
TGZ_41	0.281945	2.51652e-05	3.18158e-05	3.46813e-07	0.0013059	1.40854e-05
TGZ_42	0.281942	2.51915e-05	3.51656e-05	6.41173e-07	0.00144498	2.72625e-05
TGZ_43	0.281922	2.43571e-05	3.76875e-05	1.64805e-07	0.00152509	6.35119e-06
TGZ_44	0.281941	2.50436e-05	4.14642e-05	3.55812e-07	0.00168189	1.45812e-05
Penglai	0.282946	3.19706e-05	0.000312796	1.06972e-06	0.0132254	2.70021e-05
Penglai	0.2829	3.5436e-05	0.000326309	5.1469e-07	0.0137807	3.21201e-05
Penglai	0.282926	4.05575e-05	0.000297252	1.93935e-06	0.0126061	7.10285e-05
Penglai	0.282859	3.24971e-05	0.000270806	1.50151e-06	0.0115827	4.3652e-05
Penglai	0.282894	3.47476e-05	0.000217487	1.45681e-06	0.00921912	3.30563e-05
Penglai	0.282901	2.93018e-05	0.000320731	9.37266e-07	0.0135706	4.08078e-05
Penglai	0.282934	3.98995e-05	0.000331656	5.25428e-07	0.014017	3.12371e-05
Penglai	0.282926	3.48656e-05	0.000312181	3.27753e-07	0.0132309	4.41243e-05
Plešovice	0.282497	2.23649e-05	7.20621e-05	5.56291e-07	0.00398116	2.85471e-05
Plešovice	0.282493	2.22643e-05	8.99759e-05	5.47615e-07	0.00498393	3.1131e-05
Plešovice	0.282474	2.22329e-05	0.000127134	3.06712e-07	0.00717212	3.21401e-05
Plešovice	0.282456	2.69213e-05	0.000151737	3.64436e-07	0.0084659	2.52089e-05
Plešovice	0.282457	2.62405e-05	0.000120292	3.09403e-07	0.0067606	2.25632e-05
Plešovice	0.282517	3.27703e-05	8.49191e-05	1.96879e-07	0.00466411	1.83895e-05
Plešovice	0.282476	2.7945e-05	0.000153014	1.54296e-06	0.00866015	9.24746e-05
Plešovice	0.282473	3.23005e-05	0.000111122	1.05179e-06	0.00637139	5.03481e-05
LA-MC-ICP-MS CUG-Session 2
	176Hf/177Hf	2σ	176Lu/177Hf	2σ	176Yb/177Hf	2σ
TGZ_01	0.281915	2.9949e-05	4.61628e-05	3.12192e-07	0.00184572	1.2634e-05
TGZ_02	0.281921	2.88596e-05	5.44885e-05	1.71905e-07	0.00221956	6.78682e-06
TGZ_03	0.281897	2.96222e-05	6.54802e-05	7.86159e-07	0.00272277	4.17478e-05
TGZ_04	0.281909	2.92196e-05	5.27754e-05	4.38269e-07	0.00213607	1.92674e-05
TGZ_05	0.281896	2.23777e-05	4.68355e-05	9.50714e-08	0.00194306	6.513e-06
TGZ_06	0.281921	2.31285e-05	4.72664e-05	1.37965e-07	0.00192794	5.18302e-06
TGZ_07	0.281903	2.33397e-05	5.38068e-05	2.89622e-07	0.00217727	1.39841e-05
TGZ_08	0.281947	1.91178e-05	5.65002e-05	4.74929e-07	0.00227385	1.7206e-05
TGZ_09	0.281907	1.76649e-05	5.41372e-05	1.06324e-07	0.00219206	5.79046e-06
TGZ_10	0.281929	1.72739e-05	5.69469e-05	2.99474e-07	0.00232094	1.73879e-05
TGZ_11	0.28191	1.8316e-05	4.87953e-05	2.4405e-07	0.00198209	1.23141e-05
TGZ_12	0.28192	1.87593e-05	5.25448e-05	1.03698e-07	0.00211163	6.32858e-06
TGZ_13	0.281894	1.8655e-05	4.79235e-05	3.61052e-07	0.00191036	1.70933e-05
TGZ_14	0.281896	1.88847e-05	3.74818e-05	2.42812e-07	0.00148956	1.32612e-05
TGZ_15	0.281909	1.89674e-05	4.51737e-05	1.5361e-07	0.00176749	7.10282e-06
TGZ_16	0.281935	2.06852e-05	3.81035e-05	1.36914e-07	0.00142586	7.10423e-06
TGZ_17	0.281914	1.8536e-05	4.1756e-05	1.9236e-07	0.0015974	9.68054e-06
TGZ_18	0.281923	1.9787e-05	3.97824e-05	2.16088e-07	0.00151247	6.93614e-06
TGZ_19	0.281903	2.32014e-05	4.69497e-05	2.05252e-07	0.00180174	1.00112e-05
TGZ_20	0.281938	2.20844e-05	5.22414e-05	1.62204e-07	0.00204244	8.37126e-06
TGZ_21	0.281939	2.59454e-05	5.22183e-05	2.27105e-07	0.00206565	9.70599e-06
TGZ_22	0.281951	2.38403e-05	4.33877e-05	1.8364e-07	0.00165965	6.27757e-06
TGZ_23	0.281946	2.17e-05	5.46976e-05	3.71806e-07	0.00219201	1.64416e-05
TGZ_24	0.281946	1.88226e-05	2.89275e-05	1.25182e-07	0.0010919	5.04262e-06
TGZ_25	0.281953	1.83399e-05	4.46716e-05	3.87345e-07	0.00177764	1.97415e-05
TGZ_26	0.281911	1.80473e-05	3.13785e-05	1.04584e-07	0.00127674	4.5291e-06
TGZ_27	0.281918	1.89919e-05	3.86743e-05	3.04627e-07	0.00156528	1.26448e-05
TGZ_28	0.281922	1.7131e-05	3.59836e-05	1.52478e-07	0.00143732	5.88413e-06
TGZ_29	0.281923	1.77716e-05	4.64194e-05	1.9826e-07	0.00183222	9.58166e-06
TGZ_30	0.281919	1.9413e-05	9.24308e-05	1.75082e-07	0.00365272	1.17619e-05
TGZ_31	0.281909	1.86206e-05	9.00746e-05	1.15095e-07	0.00373026	1.4262e-05
TGZ_32	0.281935	1.87014e-05	9.28689e-05	1.17578e-07	0.00391115	1.42295e-05
TGZ_33	0.281929	1.96242e-05	8.92506e-05	1.79477e-07	0.00377787	1.87929e-05
TGZ_34	0.281923	2.02737e-05	8.14143e-05	1.45641e-07	0.00342858	1.16647e-05
TGZ_35	0.281906	2.04241e-05	8.38642e-05	1.52456e-07	0.00353421	2.04655e-05
TGZ_36	0.281948	1.9738e-05	6.95788e-05	1.88554e-07	0.00293853	1.03393e-05
TGZ_37	0.281926	1.95443e-05	6.88292e-05	3.37665e-07	0.00289997	2.05899e-05
TGZ_38	0.281918	1.87776e-05	7.69834e-05	1.12037e-07	0.00324356	1.62961e-05
TGZ_39	0.281941	1.94261e-05	6.9019e-05	8.6606e-07	0.00285488	3.14656e-05
TGZ_40	0.281933	1.93448e-05	5.73958e-05	2.21205e-07	0.00230754	9.92399e-06
TGZ_41	0.281941	1.98687e-05	5.92269e-05	2.44484e-07	0.00240591	2.25096e-05
TGZ_42	0.281935	2.28815e-05	5.53484e-05	1.20815e-07	0.0021873	9.28557e-06
TGZ_43	0.281925	2.31073e-05	5.61591e-05	1.42723e-07	0.00220951	1.11937e-05
TGZ_44	0.281919	2.3259e-05	6.04904e-05	4.10905e-07	0.00243522	1.33981e-05
TGZ_45	0.281911	2.23088e-05	6.10328e-05	1.04815e-06	0.00246407	4.12263e-05
TGZ_46	0.281909	2.82554e-05	4.68037e-05	1.83407e-07	0.00178324	6.67593e-06
TGZ_47	0.281907	2.78865e-05	4.73912e-05	1.62411e-07	0.00183807	8.02821e-06
TGZ_48	0.281909	2.6124e-05	3.50675e-05	1.32643e-07	0.00132578	5.96308e-06
TGZ_49	0.2819	2.04985e-05	4.04112e-05	4.77275e-07	0.00159582	1.77563e-05
TGZ_50	0.281913	2.07516e-05	3.55997e-05	1.21489e-07	0.00141139	6.54062e-06
TGZ_51	0.28191	2.14489e-05	9.32626e-05	2.67753e-07	0.00381501	1.41093e-05
TGZ_52	0.281898	3.00411e-05	8.66502e-05	1.40858e-07	0.0035859	1.30496e-05
TGZ_53	0.281917	3.01597e-05	8.35568e-05	1.52324e-07	0.00342415	9.71518e-06
TGZ_54	0.281901	2.99931e-05	8.27147e-05	1.38237e-07	0.00336456	9.40064e-06
TGZ_55	0.281896	2.96861e-05	8.77915e-05	2.16067e-07	0.00360157	1.60465e-05
TGZ_56	0.281926	3.01461e-05	8.2413e-05	9.97701e-08	0.00345964	1.02582e-05
TGZ_57	0.281938	3.17708e-05	9.08712e-05	1.44511e-07	0.00378889	1.33229e-05
TGZ_58	0.281945	3.14301e-05	9.38191e-05	1.15865e-07	0.00391236	1.33398e-05
TGZ_59	0.281905	3.23048e-05	8.64071e-05	1.15206e-07	0.00366467	1.06018e-05
TGZ_60	0.281921	3.16083e-05	8.82417e-05	1.87935e-07	0.0036435	1.43614e-05
TGZ_61	0.281943	3.25168e-05	7.16669e-05	2.2555e-07	0.00296971	1.4139e-05
TGZ_62	0.281932	3.6414e-05	7.46688e-05	1.33055e-07	0.00311566	1.01481e-05
TGZ_63	0.281912	3.54342e-05	8.15496e-05	1.94326e-07	0.00339977	1.22037e-05
TGZ_64	0.281933	3.52044e-05	7.76433e-05	1.54013e-07	0.00323186	1.3057e-05
TGZ_65	0.281916	3.62012e-05	6.05698e-05	2.40475e-07	0.0024594	8.88122e-06
TGZ_66	0.281936	3.67059e-05	5.15343e-05	2.96744e-07	0.00203861	1.24913e-05
TGZ_67	0.281936	3.70591e-05	4.86368e-05	1.76366e-07	0.00192425	9.84693e-06
TGZ_68	0.281952	3.58283e-05	6.04995e-05	1.51244e-07	0.00240041	8.10473e-06
TGZ_69	0.281939	1.79368e-05	5.12974e-05	1.21119e-07	0.00222547	9.95773e-06
TGZ_70	0.281927	2.04969e-05	7.1175e-05	1.3441e-07	0.0030593	1.06616e-05
TGZ_71	0.281962	1.80983e-05	5.73914e-05	2.99027e-07	0.00244145	1.97081e-05
TGZ_72	0.281948	1.90038e-05	7.29948e-05	5.41137e-07	0.00324176	1.56166e-05
TGZ_73	0.281963	1.81115e-05	8.07993e-05	1.19898e-07	0.0036266	1.64459e-05
TGZ_74	0.281952	1.80369e-05	6.96617e-05	2.91762e-07	0.00312001	1.30625e-05
TGZ_75	0.281929	2.19472e-05	6.49116e-05	2.36259e-07	0.0028738	1.91163e-05
TGZ_76	0.281914	2.32117e-05	6.94766e-05	2.69922e-07	0.0031089	9.36538e-06
TGZ_77	0.281932	2.4032e-05	5.26534e-05	1.00536e-07	0.00222261	9.71028e-06
TGZ_78	0.281944	2.28444e-05	7.04414e-05	2.99156e-07	0.00304696	2.20664e-05
TGZ_79	0.281934	2.23677e-05	5.92292e-05	1.73396e-07	0.00252152	1.24291e-05
TGZ_80	0.281932	2.26051e-05	7.67729e-05	1.14717e-07	0.00344553	1.34636e-05
TGZ_81	0.281922	1.50214e-05	8.06831e-05	2.71642e-07	0.0036293	1.07536e-05
TGZ_82	0.281932	1.25056e-05	7.39366e-05	2.12123e-07	0.00332313	1.25007e-05
TGZ_83	0.281932	1.39907e-05	6.44091e-05	3.57964e-07	0.00286838	1.3515e-05
TGZ_84	0.281939	1.10072e-05	7.65166e-05	3.86361e-07	0.00343787	3.11307e-05
TGZ_85	0.281955	1.22663e-05	8.03805e-05	3.13175e-07	0.00361865	1.20954e-05
TGZ_86	0.281957	1.99739e-05	7.59929e-05	9.97965e-08	0.00336554	1.9928e-05
TGZ_87	0.281952	2.16853e-05	5.92609e-05	1.4429e-07	0.00252493	2.0836e-05
TGZ_88	0.281954	1.97797e-05	6.8368e-05	1.20934e-07	0.00294316	1.37365e-05
TGZ_89	0.28194	2.16577e-05	6.02775e-05	1.01502e-07	0.00257931	2.16433e-05
TGZ_90	0.281921	2.05619e-05	6.0477e-05	1.0192e-07	0.00258478	1.45362e-05
TGZ_91	0.281931	1.62543e-05	8.29655e-05	5.75081e-07	0.00368278	1.16702e-05
TGZ_92	0.281938	1.82638e-05	7.77768e-05	1.73535e-07	0.00351986	1.26883e-05
TGZ_93	0.281925	3.24199e-05	7.06978e-05	1.23739e-07	0.00314013	2.02854e-05
TGZ_94	0.28195	3.10041e-05	7.06223e-05	1.43911e-07	0.00316242	1.15551e-05
TGZ_95	0.281929	3.19368e-05	8.20503e-05	1.34804e-07	0.00367112	1.72083e-05
TGZ_96	0.281921	3.24101e-05	7.83876e-05	1.39428e-07	0.0035518	1.84781e-05
TGZ_97	0.281924	3.19064e-05	6.38084e-05	6.06702e-07	0.0027404	3.90542e-05
TGZ_98	0.281918	3.2848e-05	6.43955e-05	1.99929e-07	0.0028881	8.08064e-06
TGZ_99	0.2819	2.97696e-05	7.66478e-05	2.01879e-07	0.00341069	2.2293e-05
TGZ_100	0.281899	2.94114e-05	8.62477e-05	2.54235e-07	0.00382201	1.88389e-05
TGZ_101	0.281897	2.91156e-05	7.09814e-05	1.34742e-07	0.00314838	1.48909e-05
TGZ_102	0.281911	2.88899e-05	6.13307e-05	2.96525e-07	0.0026195	1.04029e-05
TGZ_103	0.281908	3.06612e-05	6.09519e-05	1.00479e-07	0.00259494	1.88007e-05
TGZ_104	0.281935	3.11278e-05	5.02767e-05	1.21983e-07	0.00212925	1.03636e-05
TGZ_105	0.281892	3.14772e-05	4.92011e-05	1.08532e-07	0.00210267	9.75863e-06
TGZ_106	0.281904	2.9281e-05	4.93009e-05	1.41794e-07	0.00210719	7.06624e-06
TGZ_107	0.28194	2.94023e-05	4.8453e-05	1.23718e-07	0.00208017	7.38968e-06
TGZ_108	0.281917	2.962e-05	4.77245e-05	1.10689e-07	0.00204722	8.21268e-06
TGZ_109	0.281957	2.14396e-05	5.04267e-05	1.3159e-07	0.00217219	7.66738e-06
TGZ_110	0.281956	2.43607e-05	4.51199e-05	1.21748e-07	0.00191817	8.53648e-06
TGZ_111	0.281911	2.15554e-05	2.65504e-05	1.08028e-07	0.00113953	6.10303e-06
TGZ_112	0.28192	2.24077e-05	4.70082e-05	5.16872e-07	0.0020665	2.98798e-05
TGZ_113	0.281899	2.11823e-05	4.18282e-05	1.29312e-07	0.00180666	8.9704e-06
TGZ_114	0.28191	2.21292e-05	4.82441e-05	1.52202e-07	0.00206139	1.33233e-05
TGZ_115	0.281934	2.50478e-05	5.32533e-05	3.83552e-07	0.00216535	1.74299e-05
TGZ_116	0.281919	2.48471e-05	5.60534e-05	1.61736e-07	0.00228146	7.55343e-06
TGZ_117	0.281915	2.63487e-05	5.51534e-05	1.48617e-07	0.0022408	5.81108e-06
TGZ_118	0.281917	2.65612e-05	5.53907e-05	1.66238e-07	0.00227377	6.91022e-06
TGZ_119	0.281896	2.78212e-05	5.43779e-05	1.41987e-07	0.0022332	8.6276e-06
TGZ_120	0.281911	2.63345e-05	5.46774e-05	1.37796e-07	0.00222414	9.47184e-06
TGZ_121	0.281888	3.06412e-05	5.18357e-05	2.57513e-07	0.0021762	9.44989e-06
TGZ_122	0.281888	3.17634e-05	5.55285e-05	2.56873e-07	0.0023316	1.39222e-05
TGZ_123	0.281923	3.26106e-05	5.40133e-05	2.62114e-07	0.00228295	1.3812e-05
TGZ_124	0.281913	3.27282e-05	5.50359e-05	3.46769e-07	0.00228678	1.63266e-05
TGZ_125	0.281935	3.26639e-05	5.83336e-05	1.63022e-07	0.00251809	8.97347e-06
TGZ_126	0.281925	2.01644e-05	6.53214e-05	1.94785e-07	0.00274362	9.64143e-06
TGZ_127	0.281936	2.04289e-05	5.10195e-05	2.91732e-07	0.00215228	1.11206e-05
TGZ_128	0.281931	1.99494e-05	5.18095e-05	1.91578e-07	0.00217925	9.17576e-06
TGZ_129	0.281944	1.64676e-05	4.91664e-05	1.87929e-07	0.00202257	9.81752e-06
TGZ_130	0.281927	1.75161e-05	4.77904e-05	2.01271e-07	0.00200202	8.33828e-06
TGZ_131	0.281917	2.59771e-05	5.1369e-05	2.36002e-07	0.00214743	1.07694e-05
TGZ_132	0.281929	2.60016e-05	5.2783e-05	1.62627e-07	0.00221747	8.41189e-06
TGZ_133	0.281921	2.71382e-05	5.02661e-05	3.0926e-07	0.00217564	1.26323e-05
TGZ_134	0.281906	2.51937e-05	5.29118e-05	5.30055e-07	0.00220177	1.88914e-05
TGZ_135	0.281916	2.4411e-05	4.19706e-05	4.87953e-07	0.00177545	2.22239e-05
TGZ_136	0.281895	2.69145e-05	5.0069e-05	5.14914e-07	0.0021286	2.71518e-05
TGZ_137	0.281951	3.08518e-05	5.34926e-05	4.69772e-07	0.00216834	1.97493e-05
TGZ_138	0.281949	3.19888e-05	5.56379e-05	4.86781e-07	0.00227416	2.02718e-05
TGZ_139	0.281902	2.5998e-05	3.15109e-05	2.84482e-07	0.00136393	9.69875e-06
TGZ_140	0.281909	2.51323e-05	2.57038e-05	2.08226e-07	0.00111206	7.34434e-06
TGZ_141	0.281916	2.56782e-05	3.04726e-05	1.30818e-06	0.00130141	4.76852e-05
TGZ_142	0.281954	2.73147e-05	5.35821e-05	2.41792e-07	0.00218509	9.86702e-06
TGZ_143	0.281956	2.33908e-05	5.41915e-05	1.36098e-06	0.0022396	5.56214e-05
TGZ_144	0.281915	2.17949e-05	4.62657e-05	1.9396e-07	0.00187879	1.14634e-05
TGZ_145	0.281921	1.90326e-05	4.70115e-05	2.25566e-07	0.00196173	7.31656e-06
TGZ_146	0.281925	2.14982e-05	4.75199e-05	1.59771e-07	0.00197309	1.37214e-05
TGZ_147	0.281906	2.17299e-05	4.57084e-05	2.51586e-07	0.00189873	1.43501e-05
TGZ_148	0.281899	2.78514e-05	4.32467e-05	2.37785e-07	0.00177184	1.1202e-05
TGZ_149	0.281909	2.71349e-05	4.21311e-05	1.74272e-07	0.00169733	6.03579e-06
TGZ_150	0.281898	2.68646e-05	4.2467e-05	1.87677e-07	0.00172175	5.96971e-06
TGZ_151	0.28189	2.71624e-05	3.9636e-05	1.79143e-07	0.00160943	5.995e-06
TGZ_152	0.281915	2.83353e-05	4.00374e-05	2.11799e-07	0.00163443	7.42453e-06
TGZ_153	0.28192	2.51856e-05	4.28717e-05	2.34581e-07	0.00176753	1.27176e-05
TGZ_154	0.281923	2.48236e-05	3.9844e-05	4.7607e-07	0.00161543	1.43556e-05
TGZ_155	0.281945	2.51652e-05	3.18158e-05	3.46813e-07	0.0013059	1.40854e-05
TGZ_156	0.281942	2.51915e-05	3.51656e-05	6.41173e-07	0.00144498	2.72625e-05
TGZ_157	0.281922	2.43571e-05	3.76875e-05	1.64805e-07	0.00152509	6.35119e-06
TGZ_158	0.281941	2.50436e-05	4.14642e-05	3.55812e-07	0.00168189	1.45812e-05
Penglai	0.282906	2.80473e-05	0.000277314	2.74711e-07	0.0107974	6.26806e-05
Penglai	0.282907	2.63757e-05	0.000260732	2.17596e-06	0.01019	6.22489e-05
Penglai	0.282901	2.88717e-05	0.000261673	9.38537e-07	0.0103074	5.06286e-05
Penglai	0.282921	2.29911e-05	0.000233544	1.43737e-06	0.00914976	8.47721e-05
Penglai	0.282879	2.32412e-05	0.000240578	6.04591e-07	0.00943835	3.85274e-05
Penglai	0.282954	2.94042e-05	0.000272898	2.78405e-07	0.0106455	5.04016e-05
Penglai	0.282919	2.42063e-05	0.000255991	1.26063e-06	0.00996756	5.43597e-05
Penglai	0.282942	2.7244e-05	0.000253481	5.22358e-07	0.0098863	5.19364e-05
Penglai	0.282955	3.16382e-05	0.000227812	5.85458e-07	0.0088163	3.87784e-05
Penglai	0.282884	2.64762e-05	0.000233973	6.61329e-07	0.00904763	3.2919e-05
Penglai	0.2829	3.45845e-05	0.00030506	8.18838e-07	0.0117496	7.02635e-05
Penglai	0.282971	3.08123e-05	0.000311449	3.62067e-07	0.0120742	7.285e-05
Penglai	0.282939	2.75032e-05	0.000304131	8.21556e-07	0.0116597	6.50242e-05
Penglai	0.282936	2.53417e-05	0.000324145	7.02189e-07	0.0137613	5.77719e-05
Penglai	0.282907	2.6462e-05	0.000327863	2.99086e-07	0.0138673	6.34296e-05
Penglai	0.282951	2.44378e-05	0.00030346	5.70603e-07	0.0129072	3.68844e-05
Penglai	0.282901	2.11281e-05	0.000325752	2.64895e-07	0.0137488	3.91868e-05
Penglai	0.28295	2.14794e-05	0.000269351	2.71718e-07	0.0114128	4.96044e-05
Penglai	0.282912	2.37998e-05	0.000266562	3.38338e-07	0.011284	5.25921e-05
Penglai	0.282906	3.48745e-05	0.000251227	8.93949e-07	0.0105323	5.37571e-05
Penglai	0.282907	3.34477e-05	0.00024942	3.77388e-07	0.0106094	5.54443e-05
Penglai	0.282907	2.99212e-05	0.000232439	7.7611e-07	0.00975399	6.39712e-05
Penglai	0.282877	2.57548e-05	0.000231153	1.11765e-06	0.00975013	5.20971e-05
Penglai	0.282946	3.19706e-05	0.000312796	1.06972e-06	0.0132254	2.70021e-05
Penglai	0.2829	3.5436e-05	0.000326309	5.1469e-07	0.0137807	3.21201e-05
Penglai	0.282926	4.05575e-05	0.000297252	1.93935e-06	0.0126061	7.10285e-05
Penglai	0.282859	3.24971e-05	0.000270806	1.50151e-06	0.0115827	4.3652e-05
Penglai	0.282894	3.47476e-05	0.000217487	1.45681e-06	0.00921912	3.30563e-05
Penglai	0.282901	2.93018e-05	0.000320731	9.37266e-07	0.0135706	4.08078e-05
Penglai	0.282934	3.98995e-05	0.000331656	5.25428e-07	0.014017	3.12371e-05
Penglai	0.282926	3.48656e-05	0.000312181	3.27753e-07	0.0132309	4.41243e-05
Plešovice	0.282472	1.94237e-05	9.01868e-05	2.82922e-07	0.00460433	1.87601e-05
Plešovice	0.282452	2.17563e-05	6.48668e-05	6.26373e-07	0.00333875	3.18907e-05
Plešovice	0.282487	2.24231e-05	5.24889e-05	1.55655e-07	0.00269309	1.74953e-05
Plešovice	0.282476	2.07913e-05	9.02479e-05	7.06767e-07	0.00480455	3.19212e-05
Plešovice	0.282463	1.96481e-05	6.01059e-05	2.69143e-07	0.00316014	1.46036e-05
Plešovice	0.282504	1.7872e-05	5.85609e-05	2.38974e-07	0.00310561	9.8077e-06
Plešovice	0.282476	2.10765e-05	5.81724e-05	1.39296e-07	0.00307384	1.26798e-05
Plešovice	0.282474	1.94112e-05	6.19284e-05	7.73692e-07	0.00328782	3.99682e-05
Plešovice	0.282488	2.03635e-05	7.96628e-05	7.88917e-07	0.00417959	4.1047e-05
Plešovice	0.282447	2.35372e-05	8.3605e-05	1.91188e-07	0.0043824	1.40286e-05
Plešovice	0.282437	2.16811e-05	9.13308e-05	1.76928e-06	0.00479234	9.62974e-05
Plešovice	0.282436	1.91098e-05	9.13892e-05	8.83633e-07	0.00479064	4.91958e-05
Plešovice	0.282501	2.46215e-05	0.00010276	9.39989e-07	0.00532609	5.0815e-05
Plešovice	0.282474	2.38226e-05	8.64876e-05	2.11773e-07	0.00446834	1.59921e-05
Plešovice	0.282496	1.98444e-05	0.000104241	1.39638e-07	0.00590567	1.56976e-05
Plešovice	0.282464	2.12987e-05	9.1408e-05	4.49935e-07	0.00511906	2.36412e-05
Plešovice	0.282503	2.27334e-05	7.96809e-05	3.18604e-07	0.00446762	2.08935e-05
Plešovice	0.282508	2.11612e-05	9.44586e-05	2.14459e-07	0.00526337	1.57988e-05
Plešovice	0.282498	1.90465e-05	8.56631e-05	5.02804e-07	0.00481757	3.87617e-05
Plešovice	0.282516	2.10316e-05	8.49909e-05	2.91573e-07	0.00478902	1.76993e-05
Plešovice	0.282438	2.94265e-05	9.50164e-05	2.48136e-07	0.00535438	2.25667e-05
Plešovice	0.282469	2.19729e-05	9.39213e-05	5.49662e-07	0.0052228	2.01135e-05
Plešovice	0.282444	2.21645e-05	9.82685e-05	1.46119e-07	0.00557689	1.19106e-05
Plešovice	0.282453	2.16643e-05	7.20024e-05	9.28583e-07	0.00401531	4.87175e-05
Plešovice	0.282497	2.23649e-05	7.20621e-05	5.56291e-07	0.00398116	2.85471e-05
Plešovice	0.282493	2.22643e-05	8.99759e-05	5.47615e-07	0.00498393	3.1131e-05
Plešovice	0.282474	2.22329e-05	0.000127134	3.06712e-07	0.00717212	3.21401e-05
Plešovice	0.282456	2.69213e-05	0.000151737	3.64436e-07	0.0084659	2.52089e-05
Plešovice	0.282457	2.62405e-05	0.000120292	3.09403e-07	0.0067606	2.25632e-05
Plešovice	0.282517	3.27703e-05	8.49191e-05	1.96879e-07	0.00466411	1.83895e-05
Plešovice	0.282476	2.7945e-05	0.000153014	1.54296e-06	0.00866015	9.24746e-05
Plešovice	0.282473	3.23005e-05	0.000111122	1.05179e-06	0.00637139	5.03481e-05
LA-MC-ICP-MS CUG-Profile
	176Hf/177Hf	2σ	176Lu/177Hf	2σ	176Yb/177Hf	2σ
TGZ_01	0.281904	1.84523e-05	7.79481e-05	1.029e-07	0.00347634	6.12017e-06
TGZ_02	0.281919	1.84449e-05	7.79318e-05	1.6321e-07	0.00345712	8.92509e-06
TGZ_03	0.281913	1.74114e-05	9.88723e-05	1.14415e-07	0.00443133	9.39915e-06
TGZ_04	0.281896	1.81097e-05	8.4674e-05	1.60775e-07	0.00378366	1.1817e-05
TGZ_05	0.281916	1.66715e-05	8.63313e-05	9.6364e-08	0.00388743	9.66726e-06
TGZ_06	0.281898	2.08695e-05	8.78896e-05	1.1313e-07	0.00392846	8.86666e-06
TGZ_07	0.28193	2.09199e-05	7.97941e-05	1.12463e-07	0.00357098	7.98757e-06
TGZ_08	0.281905	2.14788e-05	7.5812e-05	1.084e-07	0.00342893	8.0672e-06
TGZ_09	0.281922	2.03557e-05	5.23559e-05	5.28084e-07	0.00222123	1.85754e-05
TGZ_10	0.2819	2.09661e-05	5.59644e-05	1.51846e-07	0.00239871	6.4264e-06
TGZ_11	0.281912	2.52958e-05	6.03842e-05	1.89912e-07	0.00259886	7.86318e-06
TGZ_12	0.281917	2.59288e-05	3.5904e-05	1.56248e-07	0.00152403	8.47187e-06
TGZ_13	0.281906	2.51957e-05	3.56849e-05	9.83037e-08	0.00150694	3.22646e-06
TGZ_14	0.28191	2.56191e-05	3.82992e-05	1.46729e-07	0.00160741	8.89705e-06
TGZ_15	0.281906	2.58778e-05	5.72486e-05	2.26639e-07	0.00239505	8.38985e-06
TGZ_16	0.281929	2.54503e-05	6.76487e-05	3.00689e-07	0.00287664	1.23669e-05
TGZ_17	0.281918	2.32488e-05	6.97238e-05	2.12176e-07	0.00309661	8.239e-06
TGZ_18	0.281914	2.40084e-05	7.27111e-05	1.22213e-07	0.00308677	5.82752e-06
TGZ_19	0.281932	2.29157e-05	5.75769e-05	1.15296e-07	0.00243037	7.90171e-06
TGZ_20	0.281889	2.33485e-05	4.90276e-05	9.63645e-08	0.00208915	3.44644e-06
TGZ_21	0.281921	2.37073e-05	5.47123e-05	1.14517e-07	0.00231483	6.05356e-06
TGZ_22	0.281925	2.24377e-05	5.32935e-05	8.81222e-08	0.00229486	6.08114e-06
TGZ_23	0.281909	1.36935e-05	2.6128e-05	9.01139e-08	0.00112166	3.65292e-06
TGZ_24	0.28191	1.41786e-05	4.82025e-05	1.0009e-07	0.00209173	5.13697e-06
TGZ_25	0.281916	1.63177e-05	8.45053e-05	2.96637e-07	0.00373411	8.93867e-06
TGZ_26	0.281928	1.29328e-05	3.66246e-05	1.06358e-07	0.00157873	4.68331e-06
TGZ_27	0.281928	2.04854e-05	4.89608e-05	1.32683e-07	0.00208139	7.30848e-06
TGZ_28	0.281912	1.94522e-05	4.26564e-05	1.71808e-07	0.00181442	6.9899e-06
TGZ_29	0.281922	2.08929e-05	4.52816e-05	7.20758e-07	0.00193015	2.9503e-05
TGZ_30	0.281942	2.12513e-05	4.60989e-05	2.15319e-07	0.00193093	9.56129e-06
TGZ_31	0.281923	2.07545e-05	5.09844e-05	1.63208e-07	0.00213803	7.30831e-06
TGZ_32	0.281931	1.95358e-05	7.26755e-05	2.56932e-07	0.00319345	1.29628e-05
TGZ_33	0.281909	1.99191e-05	7.18124e-05	1.28255e-07	0.00316515	6.47975e-06
TGZ_34	0.281925	1.96822e-05	5.06056e-05	3.54133e-07	0.00214358	1.67228e-05
TGZ_35	0.281895	1.90148e-05	5.09826e-05	9.2144e-07	0.00220137	3.45212e-05
TGZ_36	0.281937	1.74671e-05	3.90342e-05	2.61664e-07	0.00166976	1.4885e-05
TGZ_37	0.281903	1.89594e-05	6.06433e-05	1.35228e-07	0.00258638	9.63098e-06
TGZ_38	0.281944	1.93753e-05	4.07755e-05	1.11533e-06	0.00171675	4.65715e-05
TGZ_39	0.281914	2.00737e-05	4.93933e-05	1.71385e-07	0.00212024	6.20904e-06
TGZ_40	0.281921	1.74984e-05	3.06376e-05	2.71591e-07	0.0013025	1.09775e-05
TGZ_41	0.281925	2.27247e-05	7.50135e-05	6.64365e-07	0.00330957	3.55996e-05
TGZ_42	0.281928	2.12537e-05	7.58031e-05	2.54143e-07	0.00332901	9.84453e-06
TGZ_43	0.281938	2.18896e-05	7.18761e-05	6.37094e-07	0.00317301	2.7907e-05
TGZ_44	0.281934	1.93834e-05	2.82524e-05	1.23516e-07	0.00120128	6.62574e-06
TGZ_45	0.281938	2.00709e-05	4.16536e-05	2.95913e-07	0.00174873	1.25921e-05
TGZ_46	0.281917	2.03201e-05	4.23795e-05	1.45869e-07	0.00180188	5.09565e-06
TGZ_47	0.281928	2.72041e-05	4.81149e-05	4.40967e-07	0.00201592	1.94364e-05
TGZ_48	0.281932	2.69069e-05	4.63369e-05	1.89955e-06	0.00194959	7.94838e-05
TGZ_49	0.281935	2.86623e-05	4.37529e-05	1.13314e-07	0.0018433	4.60149e-06
TGZ_50	0.28193	2.87939e-05	4.48016e-05	1.08144e-07	0.00189137	4.64464e-06
TGZ_51	0.281927	2.7642e-05	3.82394e-05	1.87984e-07	0.00161333	7.25384e-06
TGZ_52	0.281915	5.60964e-05	4.67678e-05	4.33097e-07	0.00197777	1.70714e-05
TGZ_53	0.281894	1.55075e-05	3.96778e-05	1.66686e-07	0.00173346	6.46013e-06
TGZ_54	0.281898	1.64134e-05	4.68576e-05	2.53322e-07	0.0020068	9.89287e-06
TGZ_55	0.281889	2.68359e-05	6.14581e-05	1.43454e-07	0.00259297	6.57736e-06
TGZ_56	0.281899	2.57266e-05	4.10533e-05	2.20698e-07	0.00173732	7.15283e-06
TGZ_57	0.281896	2.57734e-05	4.30204e-05	4.82717e-07	0.00180977	1.97126e-05
TGZ_58	0.281918	2.6132e-05	3.91454e-05	2.37808e-07	0.00167012	9.47232e-06
TGZ_59	0.281912	2.66246e-05	4.52388e-05	1.77895e-07	0.00195224	6.75091e-06
TGZ_60	0.281893	2.57331e-05	3.85787e-05	2.89865e-07	0.00166354	1.27797e-05
TGZ_61	0.281906	2.41795e-05	5.2946e-05	1.06786e-07	0.00228678	4.51449e-06
TGZ_62	0.281923	2.29562e-05	4.23001e-05	1.03226e-07	0.00182699	5.54599e-06
TGZ_63	0.281893	2.43336e-05	3.42313e-05	1.75081e-07	0.00147597	7.00562e-06
TGZ_64	0.281934	2.44045e-05	7.94467e-05	5.11871e-07	0.00345446	2.43159e-05
TGZ_65	0.281907	2.47975e-05	7.63505e-05	1.35697e-07	0.00337342	8.22255e-06
TGZ_66	0.281906	2.31745e-05	4.5544e-05	1.74206e-07	0.00195034	8.13361e-06
TGZ_67	0.281928	3.16934e-05	2.67877e-05	1.02145e-07	0.00114355	4.17589e-06
TGZ_68	0.281912	3.18213e-05	4.36741e-05	1.00398e-07	0.00188228	4.85898e-06
TGZ_69	0.281924	3.23322e-05	5.30693e-05	1.00318e-07	0.00224425	5.56288e-06
TGZ_70	0.281937	3.18698e-05	6.24102e-05	3.8686e-07	0.00267122	1.7335e-05
TGZ_71	0.281926	3.22783e-05	6.05873e-05	4.70047e-07	0.00259537	2.11774e-05
TGZ_72	0.281922	3.18183e-05	5.97383e-05	1.19088e-07	0.00258465	7.67302e-06
TGZ_73	0.281937	2.7121e-05	4.711e-05	1.78093e-07	0.00201945	9.59218e-06
TGZ_74	0.28194	2.72929e-05	6.15022e-05	1.50025e-07	0.00262403	6.78338e-06
TGZ_75	0.281938	3.52442e-05	7.99573e-05	1.01929e-07	0.00354958	7.73792e-06
TGZ_76	0.28192	3.5414e-05	8.72413e-05	9.79251e-08	0.003875	8.96915e-06
TGZ_77	0.281899	3.52967e-05	7.30636e-05	1.96082e-07	0.00323809	1.09824e-05
TGZ_78	0.28191	3.56489e-05	8.46028e-05	1.04949e-07	0.00377575	1.09111e-05
TGZ_79	0.281901	3.54285e-05	8.94031e-05	1.48659e-07	0.00399894	1.09923e-05
TGZ_80	0.281906	3.49789e-05	7.72123e-05	1.06403e-07	0.00346221	7.83658e-06
TGZ_81	0.281915	2.35662e-05	5.59645e-05	1.23731e-07	0.00236397	7.2178e-06
TGZ_82	0.281906	2.19837e-05	6.33948e-05	1.04634e-07	0.00271373	7.35106e-06
TGZ_83	0.281925	2.26733e-05	6.7731e-05	8.93601e-08	0.00294163	7.99935e-06
TGZ_84	0.281913	2.24324e-05	7.32744e-05	8.9545e-08	0.00315283	7.00021e-06
TGZ_85	0.281913	2.35116e-05	7.48296e-05	8.89269e-08	0.00320268	1.04921e-05
TGZ_86	0.281908	2.34589e-05	4.63661e-05	1.09782e-07	0.0019159	5.60234e-06
TGZ_87	0.281894	1.70428e-05	4.93178e-05	1.03838e-07	0.00201819	5.31443e-06
TGZ_88	0.281893	1.81591e-05	4.52677e-05	9.04919e-08	0.00185073	7.25276e-06
TGZ_89	0.281903	1.75271e-05	2.66835e-05	8.2906e-08	0.00108398	3.99371e-06
TGZ_90	0.281892	1.85543e-05	4.40943e-05	1.98808e-07	0.00179697	9.21771e-06
TGZ_91	0.281906	1.87336e-05	4.80658e-05	8.41607e-08	0.0019736	5.34443e-06
TGZ_92	0.281911	1.81595e-05	4.87514e-05	5.24945e-07	0.00197778	2.00019e-05
TGZ_93	0.281921	1.79668e-05	4.13862e-05	1.26595e-07	0.00168718	6.54456e-06
TGZ_94	0.281907	1.90527e-05	5.76685e-05	2.72284e-07	0.00234473	1.11849e-05
TGZ_95	0.281893	1.7776e-05	4.78907e-05	4.4666e-07	0.00195717	1.80233e-05
TGZ_96	0.281914	1.82175e-05	4.30291e-05	1.71005e-07	0.00176135	5.5606e-06
TGZ_97	0.281933	1.76975e-05	5.31576e-05	2.56176e-07	0.00215437	1.04624e-05
TGZ_98	0.281911	1.82888e-05	5.26396e-05	1.00096e-07	0.00214742	3.97664e-06
TGZ_99	0.281939	1.70382e-05	3.95905e-05	1.06515e-07	0.00161183	4.10366e-06
TGZ_100	0.281929	1.90382e-05	4.39004e-05	1.09278e-07	0.00178196	4.86404e-06
TGZ_101	0.281912	1.95055e-05	4.7821e-05	1.13468e-07	0.0019509	4.57649e-06
TGZ_102	0.281936	2.48281e-05	6.88197e-05	1.29921e-07	0.00277387	8.3992e-06
TGZ_103	0.281925	2.42007e-05	7.37362e-05	1.10188e-07	0.00303753	7.69899e-06
TGZ_104	0.281916	2.51891e-05	7.78354e-05	9.22972e-08	0.00326475	7.62651e-06
TGZ_105	0.28193	2.45924e-05	7.68115e-05	9.38107e-08	0.00322819	6.7307e-06
TGZ_106	0.281946	1.78498e-05	7.04015e-05	9.56803e-08	0.00298891	7.34184e-06
TGZ_107	0.281919	1.79742e-05	8.1808e-05	9.73433e-08	0.00351121	1.01902e-05
TGZ_108	0.281923	1.86668e-05	7.94495e-05	1.06808e-07	0.00341862	8.28483e-06
TGZ_109	0.28194	1.68817e-05	7.27261e-05	1.07934e-07	0.00308049	1.11269e-05
TGZ_110	0.281924	1.75688e-05	8.00657e-05	1.09691e-07	0.00345205	7.90998e-06
TGZ_111	0.281923	1.6719e-05	7.2315e-05	5.74757e-07	0.00309863	2.29258e-05
TGZ_112	0.281905	3.68373e-05	7.51553e-05	1.01007e-07	0.00325091	9.14432e-06
TGZ_113	0.281923	3.65622e-05	6.9078e-05	1.49259e-07	0.00282027	9.45049e-06
TGZ_114	0.281904	3.70575e-05	5.23366e-05	2.06533e-07	0.00214355	9.12991e-06
TGZ_115	0.281906	3.71301e-05	2.86624e-05	1.06536e-07	0.00119102	3.89133e-06
TGZ_116	0.281895	3.64355e-05	4.73425e-05	1.12561e-07	0.00193687	5.80049e-06
TGZ_117	0.281911	3.67057e-05	4.66059e-05	1.02384e-07	0.00189828	6.30538e-06
TGZ_118	0.281892	3.44208e-05	4.31686e-05	2.15242e-07	0.00176977	8.90262e-06
TGZ_119	0.281909	3.49389e-05	4.23003e-05	9.52967e-08	0.00171927	4.73031e-06
TGZ_120	0.281922	3.41443e-05	4.12528e-05	1.00876e-07	0.00166866	5.02482e-06
TGZ_121	0.28191	3.48372e-05	4.03614e-05	4.21549e-07	0.00164534	1.71067e-05
TGZ_122	0.281928	3.45063e-05	3.78672e-05	1.08717e-07	0.00153943	5.73897e-06
TGZ_123	0.28192	1.50704e-05	4.41364e-05	1.37011e-07	0.00179247	5.22322e-06
TGZ_124	0.281912	1.46318e-05	4.54954e-05	7.14767e-07	0.00185158	2.69101e-05
TGZ_125	0.281917	1.42519e-05	4.47785e-05	1.74604e-07	0.00184248	1.0864e-05
TGZ_126	0.281919	1.3414e-05	4.4446e-05	3.39211e-07	0.00179359	1.24454e-05
TGZ_127	0.281941	1.26825e-05	4.48651e-05	1.66415e-07	0.00180003	6.79031e-06
TGZ_128	0.281898	1.36388e-05	4.85601e-05	3.64879e-07	0.00197282	1.50427e-05
TGZ_129	0.281933	2.80111e-05	4.82825e-05	5.11918e-07	0.00192418	1.99835e-05
TGZ_130	0.281903	2.88489e-05	5.24025e-05	4.29431e-07	0.00210286	1.65116e-05
TGZ_131	0.281913	2.84313e-05	5.48468e-05	2.30712e-07	0.00219192	8.33832e-06
TGZ_132	0.281909	2.84294e-05	4.54088e-05	2.07697e-07	0.00182116	8.73801e-06
TGZ_133	0.281902	2.84289e-05	4.44126e-05	1.82235e-07	0.00177953	6.97299e-06
TGZ_134	0.281921	2.84259e-05	4.3948e-05	7.03557e-08	0.00176101	3.93858e-06
Penglai	0.282894	2.34787e-05	0.000340112	8.57186e-07	0.0146513	7.71044e-05
Penglai	0.28287	2.2803e-05	0.000351309	4.50302e-07	0.0149739	5.12312e-05
Penglai	0.28289	2.53283e-05	0.000338822	3.78333e-07	0.0147299	3.22466e-05
Penglai	0.282893	3.32389e-05	0.00031311	1.07348e-06	0.0134813	4.46568e-05
Penglai	0.282941	2.7018e-05	0.000305906	8.29741e-07	0.0132461	4.25377e-05
Penglai	0.282927	2.92229e-05	0.000283449	8.10585e-07	0.012363	4.87888e-05
Penglai	0.282906	2.73429e-05	0.000230109	8.02349e-07	0.009892	4.75829e-05
Penglai	0.282913	2.5179e-05	0.000245916	1.10319e-06	0.010547	6.26688e-05
Penglai	0.282923	2.69955e-05	0.000227655	1.95995e-06	0.00977205	9.69756e-05
Penglai	0.282942	2.9947e-05	0.000232631	5.23688e-07	0.010012	3.15863e-05
Penglai	0.282896	2.43605e-05	0.000288059	9.90602e-07	0.0125448	6.25299e-05
Penglai	0.282873	2.49342e-05	0.000272514	7.90913e-07	0.0118861	5.90859e-05
Penglai	0.2829	3.41148e-05	0.000329554	3.45739e-07	0.0143257	4.44788e-05
Penglai	0.282919	3.80953e-05	0.000331124	2.77326e-07	0.014378	4.42195e-05
Penglai	0.282915	3.86802e-05	0.000338675	3.51821e-07	0.0146099	5.53536e-05
Penglai	0.282936	3.80639e-05	0.000345047	3.2739e-07	0.0150843	4.7649e-05
Penglai	0.282881	3.37434e-05	0.000341061	3.6821e-07	0.0142366	4.33494e-05
Penglai	0.282909	3.45929e-05	0.000341696	3.2255e-07	0.0142751	4.03533e-05
Penglai	0.282915	3.2922e-05	0.000338904	2.75171e-07	0.0141627	5.1717e-05
Penglai	0.282918	2.30996e-05	0.000334971	2.68404e-07	0.0138266	4.54766e-05
Penglai	0.282926	2.83136e-05	0.000329507	3.32571e-07	0.0135243	6.25913e-05
Penglai	0.282907	2.64578e-05	0.000344653	8.38471e-07	0.0141808	7.65491e-05
Penglai	0.282877	3.30499e-05	0.000332752	3.14326e-07	0.0137896	4.36382e-05
Penglai	0.282936	3.02482e-05	0.000327852	3.15308e-07	0.0135709	4.77583e-05
Penglai	0.282934	2.96172e-05	0.00031045	7.82999e-07	0.0127029	7.65573e-05
Penglai	0.282894	3.32016e-05	0.000324064	3.41151e-07	0.0134454	6.78338e-05
Penglai	0.28294	2.93237e-05	0.000309905	5.58014e-07	0.0127583	4.84808e-05
Penglai	0.282902	4.39986e-05	0.000297145	9.09161e-07	0.0121173	4.32592e-05
Penglai	0.282889	3.92645e-05	0.000324242	3.95554e-07	0.0132882	5.39024e-05
Penglai	0.282885	2.24477e-05	0.000263005	4.08328e-07	0.0107561	4.37648e-05
Penglai	0.282893	3.59262e-05	0.000334309	8.01557e-07	0.0138501	4.83754e-05
Penglai	0.282887	3.72123e-05	0.000346559	3.2563e-07	0.0143765	5.17191e-05
Penglai	0.282896	3.5006e-05	0.000275167	1.51458e-06	0.0112148	5.99789e-05
Plešovice	0.282481	1.69858e-05	0.000100476	5.22498e-07	0.005412	2.52962e-05
Plešovice	0.282486	1.82641e-05	8.22501e-05	8.24033e-07	0.00457855	4.75757e-05
Plešovice	0.282477	2.63419e-05	0.000130619	1.20431e-06	0.00753368	8.12097e-05
Plešovice	0.282486	1.56427e-05	0.00014968	2.71984e-06	0.00858823	0.000146813
Plešovice	0.282471	1.95847e-05	6.33934e-05	1.73019e-07	0.00364717	1.49562e-05
Plešovice	0.282486	1.96416e-05	6.35244e-05	2.96213e-07	0.00360585	1.57119e-05
Plešovice	0.282444	1.96376e-05	8.46418e-05	1.17124e-06	0.00480925	7.20604e-05
Plešovice	0.282467	2.09805e-05	9.17913e-05	2.74017e-07	0.00528085	2.79348e-05
Plešovice	0.282499	2.76616e-05	5.63081e-05	1.62818e-07	0.00328502	6.02803e-06
Plešovice	0.282477	1.84137e-05	6.40494e-05	4.3553e-07	0.0036701	2.4163e-05
Plešovice	0.28247	2.69515e-05	0.000100702	2.91844e-07	0.00578437	2.1144e-05
Plešovice	0.282485	3.02538e-05	0.000104905	1.23767e-06	0.00590283	6.70042e-05
Plešovice	0.282465	3.44539e-05	0.000147273	1.86039e-06	0.00836233	0.000108591
Plešovice	0.282461	3.41116e-05	0.000155522	2.75776e-07	0.00882236	4.42607e-05
LA-MC-ICP-MS WHCGS
	176Hf/177Hf	2σ	176Lu/177Hf	2σ	176Yb/177Hf	2σ
TGZ_01	0.281904	1.64356e-05	3.57872e-05	6.51012e-08	0.00149547	6.30491e-06
TGZ_02	0.28191	1.27691e-05	4.26354e-05	6.08375e-08	0.00176996	5.97287e-06
TGZ_03	0.281909	1.46444e-05	4.01179e-05	6.63556e-08	0.00167926	6.51437e-06
TGZ_04	0.281909	1.33253e-05	3.85306e-05	6.3685e-08	0.00160662	7.12174e-06
TGZ_05	0.281899	1.52748e-05	3.57286e-05	7.29564e-08	0.00149529	5.43738e-06
TGZ_06	0.281921	1.47943e-05	4.03481e-05	1.36102e-07	0.00167458	4.25433e-06
TGZ_07	0.281922	1.39367e-05	3.79458e-05	1.73979e-07	0.00157154	1.21499e-05
TGZ_08	0.281914	1.40583e-05	2.62487e-05	7.71574e-08	0.00109127	5.09296e-06
TGZ_09	0.281918	1.45119e-05	2.63723e-05	5.44898e-08	0.00110494	5.11326e-06
TGZ_10	0.281898	1.36153e-05	3.11515e-05	1.3901e-07	0.00130156	1.01213e-05
TGZ_11	0.28191	1.24189e-05	4.44169e-05	5.89322e-08	0.00184395	5.82723e-06
TGZ_12	0.281901	1.40792e-05	4.47605e-05	8.45329e-08	0.00185992	5.23551e-06
TGZ_13	0.281904	1.56027e-05	3.70374e-05	7.2691e-08	0.00154424	5.25989e-06
TGZ_14	0.281907	1.39685e-05	3.88584e-05	7.88938e-08	0.00161407	7.55911e-06
TGZ_15	0.281909	1.35617e-05	3.85561e-05	1.17574e-07	0.00160754	5.30194e-06
TGZ_16	0.281896	1.38285e-05	3.63328e-05	7.6239e-08	0.00151651	5.1991e-06
TGZ_17	0.281904	1.36442e-05	3.75692e-05	6.57314e-08	0.00155731	6.75159e-06
TGZ_18	0.281915	1.47072e-05	2.70424e-05	5.53988e-08	0.00113118	5.88787e-06
TGZ_19	0.281914	1.25512e-05	2.56749e-05	5.71316e-08	0.00106609	5.22121e-06
TGZ_20	0.281896	1.41293e-05	2.46652e-05	5.73723e-08	0.00103532	4.76552e-06
TGZ_21	0.281906	1.52975e-05	2.52686e-05	5.64897e-08	0.00107049	5.3923e-06
TGZ_22	0.281927	1.39633e-05	3.56605e-05	5.93814e-08	0.001484	5.93025e-06
TGZ_23	0.281909	1.43607e-05	3.90573e-05	1.13037e-07	0.00162696	4.53597e-06
TGZ_24	0.28191	1.38844e-05	3.85385e-05	1.0218e-07	0.00160554	5.01367e-06
TGZ_25	0.281905	1.42346e-05	4.28808e-05	7.75261e-08	0.00178697	6.54002e-06
TGZ_26	0.281909	1.41163e-05	3.25035e-05	1.73259e-07	0.0013563	1.05781e-05
TGZ_27	0.281898	1.27178e-05	2.50283e-05	6.19167e-08	0.0010494	5.23713e-06
TGZ_28	0.281906	1.4149e-05	2.69986e-05	6.03374e-08	0.00113414	4.99322e-06
TGZ_29	0.281909	1.45971e-05	2.60193e-05	6.16055e-08	0.00109847	5.52927e-06
TGZ_30	0.2819	1.3266e-05	2.48414e-05	6.27846e-08	0.00104476	4.91493e-06
Plešovice	0.282467	1.55117e-05	5.8258e-05	7.25906e-07	0.00318197	4.52941e-05
Plešovice	0.282483	1.52376e-05	5.75688e-05	4.91275e-07	0.0031218	3.04985e-05
Plešovice	0.282463	1.36624e-05	5.69631e-05	1.37036e-07	0.0031174	7.94775e-06
Plešovice	0.28246	1.47582e-05	5.67065e-05	2.42733e-07	0.00308925	1.21239e-05

## Sheet: Table S7
Table S7. Oxygen isotopic results of the TGZ zircon.
Sample	d18O (‰)
Laser fluorination results (USTC)		2SE
TGZ_01	7.08	0.1
TGZ_02	7.03	0.1
TGZ_03	7.18	0.1
TGZ_04	7.21	0.1
TGZ_05	7.07	0.1
TGZ_06	7.11	0.1
TGZ_07	7.19	0.1
TGZ_08	7.12	0.1
TGZ_09	6.98	0.1
TGZ_10	7.07	0.1
TGZ_11	7.11	0.1
Average	7.10455
±2SD	0.139245
Sample	d18O (‰)	2SE
SIMS results (GIGCAS)
TGZ_01	6.83425	0.15634
TGZ_02	6.70359	0.207949
TGZ_03	6.93598	0.209485
TGZ_04	7.02176	0.2566
TGZ_05	7.30602	0.185866
TGZ_06	7.15142	0.209904
TGZ_07	6.8926	0.214258
TGZ_08	6.86217	0.317426
TGZ_09	7.2387	0.263994
TGZ_10	7.0048	0.164819
TGZ_11	7.00331	0.191635
TGZ_12	6.91803	0.151281
TGZ_13	7.09058	0.224997
TGZ_14	6.92102	0.251162
TGZ_15	7.25266	0.220441
TGZ_16	7.03722	0.233667
TGZ_17	6.96441	0.231007
TGZ_18	6.85868	0.211967
TGZ_19	6.83475	0.192916
TGZ_20	6.67067	0.159303
TGZ_21	6.61931	0.166412
TGZ_22	6.91603	0.170129
TGZ_23	6.96142	0.226827
TGZ_24	7.13147	0.14967
TGZ_25	7.16688	0.253313
TGZ_26	7.01627	0.182584
TGZ_27	6.7385	0.22651
TGZ_28	6.78138	0.188862
TGZ_29	6.95394	0.154508
TGZ_30	6.68414	0.158959
TGZ_31	6.98286	0.255703
TGZ_32	6.89708	0.205831
TGZ_33	6.99383	0.184097
TGZ_34	6.77041	0.338003
TGZ_35	7.16539	0.185901
TGZ_36	7.12	0.31134
TGZ_37	6.89559	0.226584
TGZ_38	6.82577	0.249205
TGZ_39	7.07363	0.238807
Penglai	5.30024	0.184333
Penglai	5.46182	0.282923
Penglai	5.36158	0.251429
Penglai	5.1217	0.218678
Penglai	5.0444	0.340433
Penglai	5.25535	0.127301
Penglai	5.17606	0.160933
Penglai	5.28478	0.19381
Penglai	5.52665	0.237317
Penglai	5.37903	0.302969
Penglai	5.42741	0.234571
Penglai	5.56006	0.265142
Penglai	5.34263	0.275318
Penglai	5.24139	0.150296
Penglai	5.26583	0.205591
Penglai	5.41494	0.157754
Penglai	4.98605	0.249529
Penglai	5.37404	0.244948
Penglai	5.36606	0.15946

## Sheet: Table S8
Table S8. Summary of recommended values for TGZ zircon.
Name	U-Pb date (Ma) (2s)	U (μg g-1) (2s)	206Pb/238U ratio (2s)	207Pb/206Pb ratio (2s)	176Hf/177Hf ratio (2s)	δ18O (2s)
TGZ	561.76±0.63 Ma	98.9±40.8	0.091052±0.000018	0.058921±0.000023	0.281915±0.000007	7.10 ± 0.14‰
